# Supplementary material for: Neopterygian phylogeny: the merger assay
Source: PubMed Central journal article supplement (PMC5882744; doi:10.1098/rsos.172337), 2018-03-21
Supplement: rsos172337supp1.pdf [file rsos172337supp1.pdf]

## Supplementary File S1: Material examined and data matrix to

### Neopterygian Phylogeny: the merger assay

Adriana López-Arbarello\*, and Emilia Sferco†

†Department of Earth- and Environmental Sciences, Palaeontology & Geobiology and GeoBio-Center, Ludwig Maximilian University, Richard-Wagner-Strasse 10, D-80333 Munich, Germany ([a.Lopez-Arbarello@lrz.uni-muenchen.de](mailto:a.Lopez-Arbarello@lrz.uni-muenchen.de))

‡CICTERRA-CONICET-UNC. Av. Velez Sarsfield 1611, X0516GCA, Córdoba, Argentina.

#### Institutional abbreviations.

**AMNH**, American Museum of Natural History, New York, USA; **BGS.GSM**, British Geological Survey, London, UK; **SNSB-BSPG**, Bayerische Staatssammlung für Paläontologie und Geologie, München, Germany; **GMPKU**, Geological Museum of Peking University, Beijing, China; **GZG.V**, Geowissenschaftliches Zentrum der Georg-August-Universität, Göttingen, Germany; **IGM**, Instituto de Geología, Universidad Nacional Autónoma de México; **JM**, Jura-Museum Eichstätt, Germany; **MB**, Museum für Naturkunde, Leibniz-Institut für Evolutions- und Biodiversitätsforschung an der Humboldt-Universität, Berlin, Germany; **MHIN-UNSL-GEO**, Museo de Historia Natural de la Universidad Nacional de San Luis, San Luis, Argentina; **MHNH**, Muséum d'histoire naturelle, Le Havre, France; **MMP**, Museo Municipal de Ciencias Naturales de Mar del Plata, Argentina; **MNHN**, Muséum National d'Histoire Naturelle, Paris, France; **NHMUK**, Natural History Museum, London, UK; **NMB**, National Museum, Bloemfontein, South Africa; **NMC**, Naturkunde-Museum Coburg, Coburg, Germany; **SMF**, Senckenberg Forschungsinstitut und Naturmuseum, Frankfurt am Main, Germany; **SMNS**, Staatliches Museum für Naturkunde, Stuttgart, Germany; **TRF**, Helmut Tischlinger, private collection, Germany; **UBA**, Universidad de Buenos Aires, Vertebrate Collection, Buenos Aires, Argentina.

#### Taxa included in the cladistic analyses

*Amia calva*: UBA P.670 and Grande and Bemis (1).

†*Amia pattersoni*: based on Grande and Bemis (1).

†*Amia scutata*: based on Grande and Bemis (1).

†*Amiopsis lepidota*: JME SOS.2966, JME ETT.852, SMNS 59759, SMNS 80251, SNSB-BSPG AS.I.676, SNSB-BSPG AS.VI, SNSB-BSPG AS.VII.327, SNSB-BSPG 1964.XXIII.550, SNSB-BSPG 1964.XXIII.551, SNSB-BSPG 1966.XXX.19, and Grande and Bemis (1).

†*Amiopsis woodwardi*: based on Grande and Bemis (1).

†*Anaethalion angustus*: based on Gaudant (2), Patterson and Rosen (3), Arratia (4-7), and Poyato-Ariza (8).

†*Annaichthys pontegiuriniensis*: based on Arratia (9, 10).

†*Araripelepidotes temnurus*: MNHN BCE.334, MNHN BCE.335, MNHN BCE.336, MNHN BCE.399, MNHN BCE.340, SNSB-BSPG 1965.I.132 and detailed high quality photographs of AMNH 11813, AMNH 11832, AMNH 11833, AMNH 12716, and AMNH 11614.

†*Archaeosemionotus connectens*: SMF-P1238 (holotype), PIMUZ A/I552.

†*Aspidorhynchus acutirostris*: SNSB-BSPG 2012.I.1 (neotype), SNSB-BSPG AS.V.509, SNSB-BSPG AS.VII.1107-1109, SNSB-BSPG 1903.I.501, SNSB-BSPG 1959.I.71, SNSB-BSPG 1964.XXIII.529-532, SNSB-BSPG 1964.XXIII.539, SNSB-BSPG 1964.XXIII.542, SNSB-BSPG 1972.XX.141, SNSB-BSPG 1977.IX.3, SNSB-BSPG 1985.I.3, JME SOS.440, JME SOS.1396, JME SOS.2255, JME 197 III 6, JME SOS.2734, JME SOS.2804, JME SOS.2827, JME SOS.2829,

- JME SOS.2833, JME SOS.3260, JME SOS.3465, JME SOS.3920, JME SOS.3948, JME SOS.3949, JME SOS.3953, JME SOS.4118, JME SOS.4297, JME SOS.4377, JME SOS.4609, JME SOS.8292, MB.f. 1376, MB.f. 2858, MB.f. 3526, MB.f. 3527, MB.f.3529, MB.f.3530, MB.f.18104, NHMUK PV 37068, NHMUK PV 37802, NHMUK PV P7810, SMNS 80253, SMNS 86705.
- †*Atractosteus spatula*: based on Grande (11).
- †*Australosomus kochi*: based on Stensiö (12) and Nielsen (13).
- †*Boreosomus piveteaui*: based on Nielsen (14).
- Brycon meeki*: based on Weitzman (15), Mirande (16).
- †*Calamopleurus cylindricus*: based on Grande and Bemis (1, 17).
- †*Callipurbeckia minor*: BGS.GSM 27975 (neotype), MB.f.1617–9, NHMUK PV P. 6343, NHMUK PV P. 8047, NHMUK PV P. 29398, NHMUK PV P. 28399, NHMUK PV 19006, NHMUK PV 21349, NHMUK PV 21974, NHMUK PV 36080, NHMUK PV 44848, NHMUK PV 48255, NHMUK PV 48341.
- †*Camerichthys lunae*: based on Bermúdez-Rochas and Poyato-Ariza (18).
- †*Catervariolus hornemani*: based on Taverne (19) and Arratia (9, 10).
- †*Caturus furcatus*: JME ETT.3366, NHMUK PV 20578, NHMUK PV 37906, SNSB-BSPG AS.VII.263, SNSB-BSPG 1950.XXXV.31.
- †*Cratoamia gondwanica*: based on Brito et al. (17).
- †*Cuneatus cuneatus*: based on Grande (11).
- †*Cuneatus wileyi*: based on Grande (11).
- †*Cyclurus gurleyi*: based on Grande and Bemis (1).
- †*Cyclurus kehleri*: based on Grande and Bemis (1).
- †*Dapedium caelatum*: SMNS 56226, and Thies and Hauff (20).
- †*Dapedium pholidotum*: based on Thies and Waschkewitz (21).
- †*Dapedium stollorum*: SNSB-BSPG 1949.XV.22 and Thies and Hauff (22).
- †*Dentilepisosteus laevis*: based on Wenz and Brito (23) and Grande (11).
- †*Diplomystus dentatus*: SNSB-BSPG 1889.I.18, SNSB-BSPG 1889.I.503, SNSB-BSPG 1957.I.128, SNSB-BSPG 2008.I.81, Patterson and Rosen (3), Grande (24, 25) and Arratia (5-7).
- †*Dorsetichthys bechei*: based on Nybelin (26) and Patterson (27, 28).
- †*Ebertichthys ettlingensis*: JME ETT.2940, JME ETT.3119, and Arratia (29).
- Elops saurus*: Nybelin (30), Forey (31), Taverne (32) and Arratia (4, 6, 7).
- †*Eurycormus speciosus*: JME SOS.2339, JME SOS.2341, JME SOS.4614a-b, JME SOS.4615, SMNS 80144/37, SMNS 87848/21, SMNS 88987/3, SMNS 95445/11, SMNS 95445/12, SNSB-BSPG AS.I.1275, SNSB-BSPG AS.V.510, SNSB-BSPG 1960.XVIII.61, SNSB-BSPG 1960.XVIII.106, Arratia and Schultze (33) and Arratia (9, 10).
- Hiodon alosoides*: based on Greenwood (34), Li and Wilson (35, 36) and Hilton (37, 38).
- †*Histionotus oberndorferi*: SNSB-BSPG AS.XIX.1 and Bartram (39).
- †*Ichthyokentema purbeckensis*: based on Patterson and Griffith (40) and Patterson (28).
- †*Ionoscopus cyprinoides*: SNSB-BSPG AS.I.50 (holotype), SNSB-BSPG 1903.I.64, SNSB-BSPG 1960.XVIII.53, SNSB-BSPG 1960.XVIII.62, SNSB-BSPG 1964.XXIII.141, Grande and Bemis (1), and Maisey (41).
- †*Isanichthys lertboosi*: based on Deesri et al. (43).
- †*Isanichthys palustris*: based on Cavin and Suteethorn (44).
- †*Knerichthys bronni*: based on Arratia (9, 10).
- †*Kyphosichthys grandei*: based on Xu and Wu (45) and Sun and Ni (46).
- †*Lepidotes gigas*: MB.f.1372, MB.f.1495, MB.f.1519, MNHN HLZ.32, NHMUK PV P.14539, SNSB-BSPG AS.I.625, SNSB-BSPG 1940.I.8, and SNSB-BSPG 2015.I.82.
- Lepisosteus osseus*: UBA P.671 and Grande (11).
- †*Leptolepis coryphaenoides*: SMNS 87371, SMNS 87356, Nybelin (42), Patterson (28), Patterson and Rosen (3), and Arratia (5-7).
- †*Luisiella feruglioi*: MACN 13026-13056, MACN 13058-13069, MACN 14430, MACN 14431, 14435, MLP 35.III.1-4, MLP 67.III.1-1 a MLP 67.III.1-15, MLP 67.III.1-17 to MLP 67.III.1-21, MLP 67.III.1-23 to MLP 67.III.1-26, MLP 67.III.1-29, MLP 67.III.1-30, MLP 67.III.1-32 to MLP 67.III.1-35, MLP 67.III.1-37, MLP 67.III.1-40 to MLP 67.III.1-45, MLP 67.III.1-49 to MLP

67.III.1-53, MLP 67.III.1-56 to MLP 67.III.1-60, MLP 67.III.1-63, MLP 67.III.1-65, MLP 67.III.1-66, MLP 67.III.1-68, MLP 67.III.1-70 a MLP 67.III.1-74, MLP 76- X.7-16/2, MLP 92.XI.30-1 to MLP 92.XI.30-8, 89.XI.30-1, MPEF-PV 1354, MPEF-PV 1385, MPEF-PV 1388, MPEF-PV 1389, MPEF-PV 1469#3-5, MPEF-PV 1469#7-10, MPEF-PV 1470#2, MPEF-PV 1470#3, MPEF-PV 1470#5, MPEF-PV 1471, MPEF-PV 1472#3-4, MPEF-PV 1472#6, MPEF-PV 1472#8-10, MPEF-PV 1473, MPEF-PV 1474#1-8, MPEF-PV 1475#5, MPEF-PV 1476#1-4, MPEF-PV 1476#6-8, MPEF-PV 1476#11, MPEF-PV 1477#4, MPEF-PV 1477#6-7, MPEF-PV 1478#1, MPEF-PV 1478#3-6, MPEF-PV 1478#8, MPEF-PV 1480-1483, MPEF-PV 1484#1-2, MPEF-PV 1484#5, MPEF-PV 1484#7-9, MPEF-PV 1484#11, MPEF-PV 1485#3-5, MPEF-PV 1485#7-8, MPEF-PV 1486 A-B, MPEF-PV 1487#1-2, 1487#4-7, 1487#10, MPEF-PV 1488#1-8, MPEF-PV 1489#2-5, MPEF-PV 1489#9, MPEF-PV 1491#1-2, MPEF-PV 1491#4, MPEF-PV 1491#6, MPEF-PV 1492#3, MPEF-PV 1493#5, 1494#1, MPEF-PV 1494#3, MPEF-PV 1608, MPEF-PV 1611, MPEF-PV 1654, MPEF-PV 1768-1769, MPEF-PV 3096-3097, MPEF-PV 3170, MPEF-PV 3185-3186, MPEF-PV 3192-3193, MPEF-PV 3195-3196, MPEF-PV 3198, MPEF-PV 3200, MPEF-PV 3202, MPEF-PV 3411-3415, MPEF-PV 3417- MPEF-PV 3421, MPEF-PV 3426, MPEF-PV 3428-3429, MPEF-PV 3431-3432, MPEF-PV 3837, MPEF-PV 3904-3905, MPEF-PV 3908-3909, MPEF-PV 3911-3912, MPEF-PV 3930-3939, MPEF-PV 3942-3949, MPEF-PV 3950-3953, MPEF-PV 3956-3957, MPEF-PV 3960, MPEF-PV 3962-3967, MPEF-PV 3977, MPEF-PV 3979-3981, MPEF-PV 3983-3987, MPEF-PV 3422-3425, MPEF-PV 3427, MPEF-PV 3846-3849, MPEF-PV 3850-3856, MPEF-PV 3858-3861, MPEF-PV 3864-3873, MPEF-PV 3875-3877, MPEF-PV 3879-3885, MPEF-PV 3887-3888, MPEF-PV 3891, MPEF-PV 3906, MPEF-PV 3910, MPEF-PV 3927-3928, MPEF-PV 3940-3941, MPEF-PV 3954-3955, MPEF-PV 3959, MPEF-PV 3961, MPEF-PV 3968-3969, MPEF-PV 3974, MPEF-PV 3982, MPEF-PV 3986, MPEF-PV 3988-3989, MPEF-PV 3433, MPEF-PV 10534-10535.

†*Macrepistius arenatus*: based on Schaeffer (43, 44).

†*Macrosemmimus fegeri*: JME ETT.854 (holotype), JME ETT.67, JME ETT.77, JME ETT.172, JME ETT.244, JME ETT.853, JME ETT.888, JME ETT.978, JME ETT.1351.

†*Macrosemmius rostratus*: SNSB-BSPG AS.I.770, SNSB-BSPG 1986.XV.119, Bartram (39) and Ebert et al. (45).

†*Masillosteus janae*: based on Grande (11).

†*Masillosteus kelleri*: based on Micklich and Klappert (46) and Grande (11).

†*Neosemionotus puntanus*: MMP 1114 (holotype), MHIN-UNSL-GEO.V8, MHIN-UNSL-GEO.V64, MHIN-UNSL-GEO.V68, MHIN-UNSL-GEO.V183–185, MHIN-UNSL-GEO.V187–191.

†*Notagogus denticulatus*: SNSB-BSPG AS.I.768 (holotype), SNSB-BSPG 1967.I.303, SNSB-BSPG 1986.XV.120 and Bartram (39).

†*Notelops brama*: based on Forey (47), Maisey (48).

†*Obaichthys decoratus*: based on Wenz and Brito (23) and Grande (11).

†*Occitanichthys canjuersensis*: MNHN CNJ89 (holotype), NHMUK PV P.1118, PV 41157.

†*Ophiopsiella attenuata*: JME ETT.1896 (neotype), JME ETT.3365, JME ETT.3370, and Lane and Ebert (49).

†*Ophiopsis muensteri*: JME ETT.977, JME ETT.2077, SNSB-BSPG AS.VII.1135 (holotype), SNSB-BSPG AS.VII.267, SNSB-BSPG 1870.IV.2, SNSB-BSPG 1993.VXIII.12, and Lane and Ebert (50).

†*Orthogonikleithrus hoelli*: JME SOS.3954, JME SOS.3955, JME SOS.3957, JME SOS.3961, JME SOS.3964, Arratia (6) and Konwert (51).

†*Oshunia brevis*: based on Maisey (41, 48), and Grande and Bemis (1).

†*Pachyamia latimaxillaris*: based on Grande and Bemis (1).

†*Pachyamia mexicana*: based on Grande and Bemis (1).

†*Pachycormus macropterus*: based on Patterson (52), Mainwaring (53), and Arratia and Lambers (54).

†*Panxianichthys imparilis*: based on Xu and Shen (55) and Sun et al. (56).

†*Paralepidotus ornatus*: SNSB-BSPG 2003.XXIX.218, SNSB-BSPG 2003.XXIX.632, SNSB-BSPG 2007.I.62 (several specimens) and Tintori (57).

†*Parapholidophorus nybelini*: based on Arratia (9, 10).

†*Pholidoctenus serianus*: based on Arratia (9, 10).

†*Pholidophorettes salvus*: based on Arratia (9, 10).

- †*Pholidophorus gervasuttii*: based on Arratia (9, 10).
- †*Pholidorhynchodon malzanni*: based on Arratia (9, 10).
- †*Plesiofuro mingshuica*: based on Xu et al. (58, 59).
- †*Pliodetes nigeriensis*: MNHN GDF.1275 (holotype), MNHN GDF.1274, MNHN GDF.1276–78, MNHN GDF.1285, MNHN GDF.1288 and Wenz (59).
- †*Propterus elongatus*: SNSB-BSPG AS.I.767 (holotype), SNSB-BSPG 1963.I.173, SNSB-BSPG 1964.XXIII.145, SNSB-BSPG 1986.XV.121, SNSB-BSPG 2011.I.138 and Bartram (39).
- †*Pteronisculus stensioi*: based on Nielsen (14).
- †*Quetzalichthys perrillatae*: based on Alvarado-Ortega and Espinosa-Arrubarrena (60).
- †*Rhacolepis buccalis*: SNSB-BSPG 1967.I.159, SNSB-BSPG 1972.I.16, SNSB-BSPG 1972.I.17, SNSB-BSPG 1975.I.167, SNSB-BSPG 1989.XII.209, Forey (47), and Maisey (48) (1991).
- †*Robustichthys luopingensis*: based on Xu et al. (61).
- Salmo salar*: high quality images of MNHN-D-17 through OsteoBase (62), and NHMUK 1880.2.16, NHMUK 2017.4.4.2, and NHMUK 2017.4.4.3 through the Natural History Museum Data Portal (data.nhm.ac.uk), and Sanford (63).
- †*Sangiorgioichthys aldae*: MCSN 5050 (holotype) and Tintori and Lombardo (64).
- †*Sangiorgioichthys sui*: GMPKU P.1568 (holotype), GMPKU P.1357–9, GMPKU P.1472, GMPKU P.1558, GMPKU P.1567-8, GMPKU P.1609, GMPKU P.1636, GMPKU P.1642, GMPKU P.1656, GMPKU P.1661, GMPKU P.1695, GMPKU P.1707, GMPKU P.1973, GMPKU P.1995.
- †*Sangiorgioichthys valmarensis*: MCSN 8425 (holotype)
- †*Scheenstia mantelli*: NHMUK PV 2397, NHMUK PV 2401, NHMUK PV 2456 (holotype), NHMUK PV 3036–7, NHMUK PV 3048–49, NHMUK PV 3517–8, NHMUK PV 4916, NHMUK PV P.6336, NHMUK PV P.6344–5, NHMUK PV P.6348c, NHMUK PV P.6362, NHMUK PV P.6933, NHMUK PV P.7333, NHMUK PV P.11832–3, NHMUK PV P.14451.
- †*Scheenstia maximus*: SMF P.2386 (neotype), P.325.
- †*Scheenstia zappi*: JME Scha.80 (holotype).
- †*Semiolepis bremanus*: based on Lombardo and Tintori (65) and †*Semiolepis* sp. NHMUK PV P.10943.
- †*Semionotus bergeri*: SNSB-BSPG AS.I.512, 1960.I.25, 1960.XVI.2, GZG.V.010.001 (lectotype), GZG.V.010.002-4, MB f. 1518 (4 specimens), NMC 1264, 15128a–b, 15129, SMF P6108.
- †*Semionotus capensis*: MB f. 12240 (9 specimens), NHMUK PV P4089 (4 specimens), P56020 (7 specimens), SNSB-BSPG 1908.I.502, photographs of several specimens in the NMB.
- †*Semionotus elegans*: based on Olsen and McCune (66).
- †*Siemensichthys macrocephalus*: SNSB-BSPG AS.I.1134 (holotype), SNSB-BSPG AS.7-873, SNSB-BSPG 1929.I.25, SMNS 80144/3, SMNS 80440/43, Patterson (28) and Arratia (9, 10, 67).
- †*Solnhofenamia elongata*: SNSB-BSPG AS.VII.324 (holotype), SNSB-BSPG AS.VI.27, SNSB-BSPG AS.VI.28, SNSB-BSPG AS.VII.326, SNSB-BSPG 1875.XIV.332, and Grande and Bemis (1).
- †*Teoichthys brevipinna*: based on Machado et al. (68).
- †*Thaiichthys buddhabutrensis*: based on Cavin et al. (69).
- †*Tharsis dubius*: CPBA V.1383, CPBA V.1502, CPBA V.1505, JME SOS.3899, MB.f.15685, MB.f.2831, SNSB-BSPG 1986.XV.125, SNSB-BSPG 1953.I.9, SNSB-BSPG 1953.I.97, SNSB-BSPG 1954.I.226, SNSB-BSPG 1964.XXIII.395, SNSB-BSPG 1964.XXIII.399, SNSB-BSPG 1964.XXIII.407, SNSB-BSPG 1964.XXIII.415, SNSB-BSPG 1964.XXIII.417, SNSB-BSPG 1964.XXIII.414, SNSB-BSPG 1964.XXIII.430, SNSB-BSPG 1964.XXIII.280, SNSB-BSPG 1964.XXIII.160, SNSB-BSPG 1986.I.41, SNSB-BSPG 1986.I.37, SNSB-BSPG 1960.XVIII.90, SNSB-BSPG 1960.XVIII.91, SNSB-BSPG 1960.XVIII.97, SNSB-BSPG 1960.XVIII.98, SNSB-BSPG 1961.III.23, SNSB-BSPG 1961.I.466, BSPG 1964.XXIII.384, SNSB-BSPG 1968.XV.29, SNSB-BSPG 1969.XVI.32, SNSB-BSPG 1969.XVI.39, SNSB-BSPG 1994.V.5, SNSB-BSPG AS.VI.25, Nybelin (42), Patterson (28), Patterson and Rosen (3), and Arratia (5).
- †*Thrissops formosus*: JME ETT.46–47, JME ETT.73–76, JME ETT.87, JME ETT.126, JME ETT.211, ETT.283, ETT.564, ETT.867, JME ETT.879, JME ETT.887, JME ETT.972, JME ETT.1350, JME ETT.1805, JME SOS.7849, MNHN-CRN 61, SNSB-BSPG AS.VII.2 (holotype), SNSB-BSPG AS.VII.175, SNSB-BSPG AS.VII.178, SNSB-BSPG 1993.XVIII.P15, Nybelin (70), and Patterson and Rosen (3).

- †*Ticinolepis crassidens*: PIMUZ T273 (holotype), PIMUZ T237, PIMUZ T240, PIMUZ T248, PIMUZ T256-257, PIMUZ T265, PIMUZ T277-278, PIMUZ T315, PIMUZ T331, PIMUZ T341, PIMUZ T358, PIMUZ T401, PIMUZ T413, PIMUZ T438, PIMUZ T638, and PIMUZ T4350.
- †*Ticinolepis longaeva*: MCSN 8072 (holotype), MCSN 8001, MCSN 8007–9, MCSN 8011, MCSN 8073, MCSN 8077, MCSN 8083–4, MCSN 8086, MCSN 8412–13, MCSN 8415, PIMUZ T1789, PIMUZ T4785, PIMUZ T4788-4790, PIMUZ T4987.
- †*Tlayuamichin itzli*: IGM 6716 (holotype), IGM 6717–20.
- †*Varasichthys ariasi*: Arratia (71-73).
- †*Vidalamia catalunica*: based on Grande and Bemis (1).
- †*Watsonulus eugnathoides*: based on Olsen (74) and Grande and Bemis (1).

### **Additional taxa not included in the analyses**

- †*Anaethalion knorri*: JME SOS.2267a, JME SOS.2282, JME SOS.2270a, JME SOS.2281, JME SOS.2280, SNSB-BSPG 1960.XVIII.93, SNSB-BSPG 1964.XXIII.394, SNSB-BSPG 1969.XVI.31, SNSB-BSPG 1969.XI.39, SNSB-BSPG 1968.XV.129, SNSB-BSPG 1991.I.122, SNSB-BSPG 1968.XV.3, SNSB-BSPG AS.I.1473.
- †*Belonostomus tenuirostris*: SNSB-BSPG AS.I.1207, SNSB-BSPG 1961.I.212.
- †*Belonostomus speciosus*: SNSB-BSPG AS.VII.1069.
- †*Cavenderichthys talbragarensis*: MB.f.4917, MB.f.5001, MB.f.5006, MB.f.5004, MB.f.5005, MB.f.5002, MB.f.5003. NHMUK PV 12424-12439, NHMUK PV 12441-12449, NHMUK PV 12450-12451, NHMUK PV 37973-37977, NHMUK PV 18113, SNSB-BSPG 1939.X.321, TRF 68, TRF 60, TRF 61, TRF 64.
- †*Lepidotes elvensis*: MNHN JRE.250, MNHN JRE.251, MNHN JRE.254, MNHN JRE.545 (holotype).
- †*Lepidotes semiserratus*: NHMUK PV P.3528, NHMUK PV P.7410, NHMUK PV 35556, NHMUK PV 62939.
- †*Leptolepides haertesi*: JME SOS.2473, JME SOS.2471, JME SOS.2554.
- †*Leptolepides sprattiformis*: CPBA V.282, JME SOS.2305, JME SOS.2422, JME SOS.2463, JME SOS.2472, JME SOS.2956.
- †*Macrosemimimus lennieri*: MNHN PV 7267 (holotype of *Lepidotes lennieri*).
- †*Lepidotes toombi*: NHMUK PV P.2518 (holotype), NHMUK PV P.34511.
- Lepisosteus* sp.: MB.f.18498.
- †*Macrosemius fourneti*: SNSB-BSPG AS.I.768 (holotype).
- †*Notagogus decoratus*: SNSB-BSPG 1986.XV.119.
- †*Obaichthys africanus*: SNSB-BSPG 1993.IX.320 (scales).
- †*Orthogonikleithrus leichi*: JME SOS.2301, JME SOS.2632.
- †*Propterus microstomus*: SNSB-BSPG AS.VII.268 (holotype), SNSB-BSPG AS.I.637, SNSB-BSPG 2011.I.139.
- †*Scheenstia decoratus*: SNSB-BSPG AS.VI.3 (holotype).
- †*Scheenstia degenhardti*: MB.f.1499 (holotype).
- †*Scheenstia laevis*: MNHN CRN.61.
- †*Siemensichthys* sp.: SMNS 80144/3, SMNS 86214/20, SMNS 87316/10, SMNS 95398/6.
- †*Vinctifer comptoni*: SNSB-BSPG 1971.I.169a-b, SNSB-BSPG 1972.I.14, SNSB-BSPG 1972.I.28, CPBA V.14066.

## References

1. Grande L, Bemis WE. A comprehensive phylogenetic study of amiid fishes (Amiidae) based on comparative skeletal anatomy: An empirical search for interconnected patterns of natural history. *Memoirs of the Society of Vertebrate Paleontology*. 1998;4:I-X, 1-690.
2. Gaudant J. Contribution à une révision des *Anaethalion* de Cérin (Ain). *Bulletin Bureau de Recherche Géologique et minéralogique*. 1968;2:5-15.
3. Patterson C, Rosen DE. Review of ichthyodectiform and other Mesozoic teleost fishes and the theory and practice of classifying fossils. *Bulletin of the American Museum of Natural History*. 1977;158(2):81-172.
4. Arratia G. *Anaethalion* and similar Teleosts (Actinopterygii, Pisces) from the Late Jurassic (Tithonian) of Southern Germany and their relationships. *Palaeontographica Abt A*. 1987;200(1-3):1-44.
5. Arratia G. The caudal skeleton of Jurassic teleosts: a phylogenetic analysis. In: Chang M-M, Liu H, Zhang G, editors. *Early vertebrates and related problems in evolutionary biology*: Beijing: Science Press; 1991. p. 249-340.
6. Arratia G. Basal teleosts and teleostean phylogeny. *Palaeo Ichthyologica*. 1997;7:5-168.
7. Arratia G. The monophyly of Teleostei and stem-group teleosts. Consensus and disagreements. In: Arratia G, Schultze H-P, editors. *Mesozoic Fishes 2 Systematics and Fossil Record*. München: Verlag Dr. Friedrich Pfeil; 1999. p. 265-334.
8. Poyato-Ariza FJ. The elopiform fish *Anaethalion angustus* restored, with comments on individual variation. In: Arratia G, Schultze H-P, editors. *Mesozoic Fishes 2 – Systematics and Fossil Record*. Munich, Germany: Verlag Dr Friedrich Pfeil; 1999. p. 361-8.
9. Arratia G. Morphology, taxonomy, and phylogeny of Triassic pholidophorid fishes (Actinopterygii, Teleostei). *Journal of Vertebrate Paleontology*. 2013;33:1-138.
10. Arratia G. NEW TRIASSIC TELEOSTS (ACTINOPTERYGII, TELEOSTEOMORPHA) FROM NORTHERN ITALY AND THEIR PHYLOGENETIC RELATIONSHIPS AMONG THE MOST BASAL TELEOSTS. *Journal of Vertebrate Paleontology*. 2017;37(2):24.
11. Grande L. An empirical synthetic pattern study of gars (Lepisosteiformes) and closely related species, based mostly on skeletal anatomy. The resurrection of Holostei. *American Society of Ichthyologists and Herpetologists, Special Publication*. 2010(6):1-863.
12. Stensiö E. Triassic fishes from east Greenland collected by the Danish Expeditions in 1929-1931. *Meddelelser om Grønland*. 1932;83(3):1-305.
13. Nielsen E. Studies on Triassic Fishes II: *Australosomus* and *Birgeria*. *Meddelelser om Grønland*. 1949;146(1):1-309.
14. Nielsen E. Studies on Triassic Fishes I: *Glaucolepis* and *Boreosomus*. *Meddelelser om Grønland*. 1942;138:1-394.
15. Weitzman SH. The osteology of *Brycon meeki*, a generalized characid fish, with an osteological definition of the family: Division of Systematic Biology, Stanford University; 1962.
16. Miranda JM. Phylogeny of the family Characidae (Teleostei: Characiformes): from characters to taxonomy. *Neotropical Ichthyology*. 2010;8(3):385-568.
17. Brito PM, Yabumoto Y, Grande L. New Amiid fish (Halecomorphi: Amiiformes) from the lower Cretaceous Crato Formation, Araripe Basin, northeast Brazil. *Journal of Vertebrate Paleontology*. 2008;28(4):1007-14.
18. Bermudez-Rochas DD, Poyato-Ariza FJ. A new semionotiform actinopterygian fish from the Mesozoic of Spain and its phylogenetic implications. *Journal of Systematic Palaeontology*. 2015;13(4):265-85.
19. Taverne L. Ostéologie et relations de *Catervariolus* (Teleostei, "Pholidophoriformes") du Jurassique moyen de Kisangani (Formation de Stanleyville) en République Démocratique du Congo. *Bulletin de l'Institut Royal des Sciences Naturelles de Belgique Sciences de la Terre*. 2011;81:175-212.
20. Thies D, Hauff RB. A neotype for *Dapedium caelatum* Quenstedt, 1858 (Actinopterygii, Neopterygii, Semionotiformes) from the Early Jurassic (Early Toarcian) of South Germany. *Geologica et Palaeontologica*. 2008;42:23-38.

21. Thies D, Waschkewitz J. Redescription of *Dapedium pholidotum* (Agassiz, 1832) (Actinopterygii, Neopterygii) from the Lower Jurassic Posidonia Shale, with comments on the phylogenetic position of *Dapedium* Leach, 1822. *Journal of Systematic Palaeontology*. 2016;14(4):339-64.
22. Thies D, Hauff R. A new species of *Dapedium* Leach, 1822 (Actinopterygii, Neopterygii, Semionotiformes) from the Early Jurassic of South Germany. *Palaeodiversity*. 2011;4:185-221.
23. Wenz S, Brito PM. First occurrence of lepisosteids (Pisces, Actinopterygii) from the Lower Cretaceous in the Chapada-do-Araripe (N-E Brazil) - implications for the phylogeny of Ginglymodi. *Comptes Rendus De L Academie Des Sciences Serie Ii*. 1992;314(13):1519-25.
24. Grande L. A revision of the fossil genus *Diplomystus*, with comments on the Interrelationships of Clupeomorph Fishes. *American Museum Novitates*. 1982;2728:1-34.
25. Grande L. Recent and fossil Clupeomorph fishes with materials for revision of the subgroups of Clupeoids. *Bulletin of the American Museum of Natural History*. 1985;181(2):231-372.
26. Nybelin O. On certain Triassic and Liassic representatives of the family Pholidophoridae s. str. *Bulletin of the British Museum (Natural History), Geology*. 1966;11(8):351-432.
27. Patterson C. The caudal skeleton in Lower Liassic Pholidophorid fishes. *Bulletin of the British Museum (Natural History), Geology*. 1968;16(5):203-39.
28. Patterson C. The braincase of pholidophorid and leptolepid fishes, with a review of the actinopterygian braincase. *Philosophical Transactions of the Royal Society of London*. 1975;269(899):275-579.
29. Arratia G. New remarkable Late Jurassic teleosts from southern Germany: Ascalaboidae n. fam., its content, morphology, and phylogenetic relationships. *Fossil Record*. 2016;19(1):31-59.
30. Nybelin O. On the Caudal Skeleton in Elops: With Remarks on Other Teleostean Fishes: Almquist & Wiksell (distr.); 1971.
31. Forey PL. Relationships of elopomorphs. In: PH G, RS M, C P, editors. *Interrelationships of Fishes*. London, UK: Academic Press for the Linnean Society of London.; 1973. p. 351-68.
32. Taverne L. L'ostéologie d'Elops Linné, c., 1766 (Pisces Elopiformes) et son intérêt phylogénétique. *Mém Acad Roy CI Sci Collect*. 1974;8:1-96.
33. Arratia G, Schultze H-P. *Eurycormus* – *Eurypoma*: two Jurassic actinopterygian genera with mixed identity. *Fossil Record*. 2007;10(1):17-37.
34. Greenwood P. Interrelationships of osteoglossomorphs. In: PH G, RS M, C P, editors. *Interrelationships of Fishes*. London, UK: Academic Press for the Linnean Society of London; 1973. p. 307–32.
35. GQ L, MVH W. Phylogeny of Osteoglossomorpha. In: MLJ S, LD P, GD J, editors. *Interrelationships of fishes*. San Diego, USA: Academic Press; 1996. p. 163-74.
36. LI G-Q, WILSON MV, editors. Early divergence of Hiodontiformes sensu stricto in East Asia and phylogeny of some Late Mesozoic teleosts from China. *Mesozoic fishes 2: systematics and fossil record*; 1999; Munich, Germany: Verlag Dr Friedrich Pfeil.
37. Hilton EJ. Osteology of the Extant North American Fishes of the Genus *Hiodon* Lesueur, 1818 (Teleostei: Osteoglossomorpha: Hiodontiformes). *Fieldiana: Zoology, New Series*. 2002;100:1-142.
38. Hilton EJ. Comparative osteology and phylogenetic systematics of fossil and living bony-tongue fishes (Actinopterygii, Teleostei, Osteoglossomorpha). *Zoological Journal of the Linnean Society*. 2003;137:1-100.
39. Bartram AWH. The Macrosemiidae, a Mesozoic family of holostean fishes. *Bulletin of the British Museum (Natural History), Geology*. 1977;29(2):137-234.
40. Griffith J, Patterson C. The structure and relationships of the Jurassic fish *Ichthyokentema purbeckensis*. *Bulletin of the British Museum (Natural History), Geology*. 1963;8(1):3-43.
41. Maisey JG. The supraotic bone in neopterygian fishes (Osteichthyes, Actinopterygii). *American Museum Novitates*. 1999;3267:1-52.
42. Nybelin O. A revision of the leptolepid fishes. *Acta Regiae Societatis Scientiarum et Litterarum Gothoburgensis, Zoologica*. 1974;9:1-202.
43. Schaeffer B. A new actinopterygian fish from the Cretaceous of North America. *American Museum Novitates*. 1968;2344:1-10.

44. Schaeffer B. The Braincase of the Holostean Fish *Macrepistius*, with Comments on Neurocranial Ossification in the Actinopterygii. *American Museum Novitates*. 1971;2459:1-34.
45. Ebert M, Lane JA, Kolbl-Ebert M. *Palaeomacrosemius thiollieri*, gen. et sp nov., a new Macrosemiidae (Neopterygii) from the Upper Jurassic of the Solnhofen Archipelago (Germany) and Cerin (France), with a revision of the genus *Macrosemius*. *Journal of Vertebrate Paleontology*. 2016;36(5):22.
46. Micklich N, Klappert G. *Masillosteus kelleri*, a New Gar (Actinopterygii, Lepisosteidae) from the Middle Eocene of Grube Messel (Hessen, Germany). *Kaupia*. 2001;11:73-81.
47. Forey PL. The osteology of *Notelops* Woodward, *Rhacolepis* Agassiz and *Pachyrhizodus* Dixon (Pisces: Teleostei). *Bulletin of the British Museum (Natural History) - Geology*. 1977;28(2):123-204.
48. Maisey JG. *Santana Fossils: An Illustrated Atlas*. Maisey JG, editor. Neptune City: T.F.H. Publications, Inc.; 1991 // 1-455 p.
49. Lane JA, Ebert M. A taxonomic reassessment of ophiopsis (Halecomorphi, Ionoscopiformes), with a revision of Upper Jurassic species from the Solnhofen Archipelago, and a new genus of Ophiopsidae. *Journal of Vertebrate Paleontology*. 2015;35(1).
50. Lane JA, Ebert M. Revision of *Furo muensteri* (Halecomorphi, Ophiopsidae) from the Upper Jurassic of Western Europe, with comments on the genus. *Journal of Vertebrate Paleontology*. 2012;32(4):799-819.
51. Konwert M. *Orthogonikleithrus francogalliensis*, sp nov (Teleostei, Orthogonikleithridae) from the Late Jurassic Plattenkalks of Cerin (France). *Journal of Vertebrate Paleontology*. 2016;36(3):10.
52. Patterson C. Interrelationships of holosteans. In: Greenwood PH, Miles RS, Patterson C, editors. *Interrelationships of fishes*. London: Academic Press; 1973. p. 233-305.
53. Mainwaring AJ. *Anatomical and systematic review of the Pachycormidae, a family of Mesozoic fossil fishes*. Unpublished: Westfield College; 1978.
54. Arratia G, Lambers P. The caudal skeleton of pachycormiforms: Parallel evolution? In: Arratia G, Viohl G, editors. *Mesozoic Fishes - Systematics and Paleocology*. München, Germany: Verlag Dr. Friedrich Pfeil; 1996. p. 191-218.
55. Xu G-H, Shen C-C. *Panxianichthys imparilis* gen. et sp. nov., a new ionoscopiform (Halecomorphi) from the Middle Triassic of Guizhou, China. *Vertebrata Palasiatica*. 2015;53(1):1-15.
56. Sun ZY, Tintori A, Xu YZ, Lombardo C, Ni PG, Jiang DY. A new non-parasemionotiform order of the Halecomorphi (Neopterygii, Actinopterygii) from the Middle Triassic of Tethys. *Journal of Systematic Palaeontology*. 2017;15(3):223-40.
57. Tintori A. *Paralepidotus ornatus* (Agassiz 1833-43): A semionotid from the Norian (Late Triassic) of Europe. In: Arratia G, Viohl G, editors. *Mesozoic Fishes: Systematics and Paleocology*. München: Verlag Dr. Friedrich Pfeil; 1996. p. 167-79.
58. Xu GH, Gao KQ, Coates MI. Taxonomic revision of *Plesiofuro mingshuica* from the Lower Triassic of Northern Gansu, China, and the relationships of early neopterygian clades. *Journal of Vertebrate Paleontology*. 2015;35(6):14.
59. Wenz S. †*Pliodetes nigeriensis*, gen. nov. et. sp. nov., a new semionotid fish from the Lower Cretaceous of Gadoufaoua (Niger Republic): phylogenetic comments. In: Arratia G, Schultze H-P, editors. *Mesozoic Fishes 2 – Systematics and Fossil Record*. München, Germany: Verlag Dr. Friederich Pfeil; 1999. p. 107-20.
60. Alvarado-Ortega J, Espinosa-Arrubarrena L. A new genus of ionoscopiform fish (Halecomorphi) from the Lower Cretaceous (Albian) lithographic limestones of the Tlayua quarry, Puebla, Mexico. *Journal of Paleontology*. 2008;82(1):163-75.
61. Xu G-H, Zhao L-J, Coates MI. The oldest ionoscopiform from China sheds new light on the early evolution of halecomorph fishes. *Biology Letters*. 2014;10(5).
62. Osteobase [Internet]. 2016.
63. Sanford CPJ. *Salmonoid fish osteology and phylogeny (Teleostei: Salmonoidei)*. Theses Zoologicae. 2000;33:264 p.
64. Tintori A, Lombardo C. A new early Semionotidae (Semionotiformes, Actinopterygii) from the Upper Ladinian of the Monte San Giorgio area (Southern Switzerland and Northern Italy). *Rivista Italiana di Paleontologia e Stratigrafia*. 2007;113(3):369-81.



65. Lombardo C, Tintori A. A new semionotid fish (Actinopterygii, Osteichthyes) from the Late Triassic of the Northern Italy. In: Arratia G, Schultze H-P, Wilson MVH, editors. Mesozoic Fishes 4 – Homology and phylogeny. München: Verlag Dr. Friedrich Pfeil; 2008. p. 129-42.
66. Olsen PE, McCune AR. Morphology of the *Semionotus elegans* species group from the Early Jurassic part of the Newark Supergroup of eastern North America with comments on the Family Semionotidae (Neopterygii). *Journal of Vertebrate Paleontology*. 1991;11(3):269-92.
67. Arratia G. New teleostean fishes from the Jurassic of southern Germany and the systematic problems concerning the 'pholidophoriforms'. *Paläontologische Zeitschrift*. 2000;74(1/2):113-43.
68. Machado GP, Alvarado-Ortega J, Machado LP, Brito PM. *Teoichthys brevipina*, sp nov., a new ophiopsid fish (Halecomorphi, Ionoscopiformes) from the Lower Cretaceous Tlayua Formation, Central Mexico. *Journal of Vertebrate Paleontology*. 2013;33(2):482-7.
69. Cavin L, Deesri U, Suteethorn V. Osteology and relationships of *Thaichthys* nov gen.: a Ginglymodi from the Late Jurassic - Early Cretaceous of Thailand. *Palaeontology*. 2013;56(1):183-208.
70. Nybelin O. Versuch einer taxonomischen Revision der jurassischen Fischgattung *Thrissops* Agassiz: Meddeland Från Göteborgs. *Musei Zoologica Avdeling*. 1964;135:1-44.
71. Arratia G. *Varasichthys ariasi* n. gen. et sp. from the Upper Jurassic of Chile (Pisces, Teleostei, Varasichthyidae n. fam.). *Palaeontographica Abteilung A*. 1981;175:107-39.
72. Arratia G. Phylogenetic and paleogeographic relationships of the varasichthyid group (Teleostei) from the Late Jurassic of Central and South America. *Revista Geológica de Chile*. 1994;21(1):119-65.
73. Arratia G. The varasichthyid and other crossognathiform fishes, and the Break-up of Pangaea. In: Longbottom C, L., Richter M, editors. *Fishes and the Break-up of Pangaea*. 295: Geological Society Special Publications; 2008. p. 71-92.
74. Olsen PE. The skull and pectoral girdle of the parasemionotid fish *Watsonulus eugnathoides* from the Early Triassic Sakamena Group of Madagascar, with comments on the relationships of the holostean fishes. *Journal of Vertebrate Paleontology*. 1984;4(3):481-99.

## Data matrix

### †*Pteronisculus stensioi*

|   |   |   |   |   |   |   |   |   |   |   |   |
|---|---|---|---|---|---|---|---|---|---|---|---|
| 1 | 0 | 0 | 0 | - | 1 | 0 | 0 | - | 0 | 0 | - |
| 1 | - | - | ? | 0 | - | - | 0 | ? | ? | 0 | 0 |
| - | 0 | - | - | 0 | 1 | 0 | 0 | 0 | 0 | - | 0 |
| 0 | - | - | 0 | 0 | 0 | 0 | 0 | 0 | 0 | 0 | - |
| 0 | 0 | 1 | 0 | 0 | 0 | 0 | 1 | 1 | 0 | - | 0 |
| 0 | 0 | 0 | 0 | 0 | 0 | 0 | - | 0 | 0 | 0 | 0 |
| ? | - | 0 | ? | ? | ? | 0 | 0 | 1 | 0 | - | - |
| - | 0 | 0 | 0 | 0 | 1 | 0 | 0 | 0 | 1 | 0 | 1 |
| 0 | 0 | 0 | 0 | 0 | 0 | 1 | 0 | 0 | 0 | 2 | 0 |
| 0 | 0 | 0 | 0 | 1 | - | - | - | - | - | 0 | 0 |
| 0 | 1 | 0 | 0 | 1 | 0 | 2 | 0 | 0 | 0 | - | - |
| - | 0 | 0 | 1 | 0 | 0 | 1 | 0 | - | 0 | 0 | 1 |
| 0 | 0 | 0 | 0 | 0 | 0 | 0 | - | - | 0 | 0 | - |
| 0 | 0 | 3 | 0 | 0 | 0 | 0 | - | - | 0 | 0 | 0 |
| - | 1 | 0 | 0 | 0 | 0 | - | 0 | 0 | 0 | 0 | 0 |
| 0 | 0 | 0 | 0 | 0 | - | 0 | 0 | - | - | - | 0 |
| - | 0 | 0 | 0 | 0 | 0 | 0 | 0 | - | - | 0 | 0 |
| - | 0 | 2 | 1 | - | ? | 0 | ? | 0 | 0 | - | 0 |
| 1 | 0 | 0 | 0 | 2 | 0 | 0 | - | 0 | 0 | 0 | 1 |
| - | - | 0 | ? | ? | - | 0 | 1 | 1 | 1 | 0 | 0 |
| 0 | - | - | ? | 0 | 0 | ? | 0 | 0 | ? | ? | ? |

|   |   |   |   |   |   |   |   |   |   |   |   |
|---|---|---|---|---|---|---|---|---|---|---|---|
| ? | ? | ? | ? | - | - | - | - | - | ? | 0 | ? |
| 1 | 0 | 0 | 0 | 0 | - | 0 | 0 | 0 | - | - | - |
| - | 0 | 0 | 0 | ? | ? | - | ? | ? | 0 | 0 | 0 |
| ? | 3 | 0 | 1 | ? | 0 | ? | - | - | - | ? | 0 |
| 2 | 0 | - | - | ? | 1 | 0 | 0 | ? | ? | 0 | - |
| - | 0 | 0 | ? | 0 | 0 | 1 | 1 | 0 | 1 | 0 | 0 |
| 0 | 1 | 0 | 0 | 0 | 0 | 0 | 0 | 0 | 0 | 0 | ? |
| 0 | 0 | 0 |   |   |   |   |   |   |   |   |   |

†*Australosomus kochi*

|   |   |   |   |   |   |   |   |   |   |   |   |
|---|---|---|---|---|---|---|---|---|---|---|---|
| 1 | 0 | 1 | 0 | - | 0 | 0 | 1 | 0 | 1 | 0 | - |
| 1 | - | 0 | 0 | 0 | - | - | 0 | 0 | - | 0 | 0 |
| - | 0 | - | - | 0 | 1 | 0 | 0 | 0 | 0 | - | 0 |
| 0 | - | - | 0 | 0 | ? | 0 | 0 | 0 | 0 | 0 | - |
| 0 | 0 | 0 | 0 | 2 | 0 | - | 0 | - | 0 | - | 1 |
| - | 0 | 0 | 0 | 0 | 0 | 0 | - | 0 | 0 | 0 | 0 |
| ? | - | 0 | 0 | ? | ? | 0 | 0 | ? | 0 | - | - |
| - | 0 | 0 | 0 | 0 | 0 | 0 | 0 | - | 1 | - | 0 |
| 0 | 0 | 1 | 2 | 1 | 0 | 1 | 0 | 0 | 0 | 2 | 0 |
| ? | ? | 0 | 0 | 1 | - | - | - | - | - | - | - |
| - | - | 0 | 0 | 1 | 1 | - | - | - | 0 | - | - |
| - | 0 | - | - | - | - | - | ? | - | 0 | 1 | - |
| - | - | - | - | - | - | - | - | - | 0 | 0 | - |
| 0 | 0 | 3 | 0 | 0 | 0 | 0 | - | - | 0 | 0 | 0 |
| - | 1 | 0 | 0 | 0 | 0 | - | 1 | 0 | - | - | 0 |
| 0 | 0 | 0 | 0 | - | - | 2 | 1 | 0 | - | - | 0 |
| - | 0 | 0 | 0 | 0 | 0 | 4 | 0 | - | - | 0 | 0 |
| - | 0 | 3 | 1 | - | 0 | 0 | 0 | 1 | 0 | - | 1 |
| 3 | 0 | 0 | 0 | - | 1 | 0 | - | 0 | 1 | 0 | 1 |
| - | - | 0 | - | 0 | 0 | 0 | 0 | 0 | - | - | 0 |
| 0 | - | 0 | 0 | 0 | 0 | 0 | 0 | 0 | 0 | 0 | 0 |
| 0 | 0 | 0 | 0 | - | - | 1 | 0 | 0 | ? | 0 | 4 |
| 1 | 0 | 0 | 1 | 0 | 0 | 0 | 0 | 0 | - | - | - |
| - | 0 | 0 | 0 | 0 | 0 | 0 | 0 | ? | 0 | 0 | 0 |
| ? | 3 | ? | 1 | ? | 0 | ? | 0 | 0 | 2 | - | 0 |
| 2 | 0 | 0 | - | 0 | 2 | 0 | 1 | - | 0 | 0 | - |
| - | 0 | 1 | - | 0 | 0 | 0 | 0 | 0 | 0 | 2 | 0 |
| 0 | 1 | 0 | 0 | 0 | 0 | 0 | 0 | ? | 1 | 0 | 2 |
| 1 | 1 | 0 |   |   |   |   |   |   |   |   |   |

†*Boreosomus piveteaui*

|   |   |   |   |   |   |   |   |   |   |   |   |
|---|---|---|---|---|---|---|---|---|---|---|---|
| 2 | 0 | 0 | 0 | - | ? | 0 | 1 | 0 | 0 | 0 | - |
| 1 | - | 0 | 0 | 0 | - | - | 0 | 0 | - | 0 | 0 |
| - | 0 | - | - | 1 | 1 | 0 | 0 | 0 | 0 | - | 0 |
| 0 | - | - | 1 | 0 | 0 | 0 | 0 | 0 | 0 | 0 | - |
| 0 | 0 | 0 | 0 | 2 | 1 | - | 1 | 1 | 1 | 0 | 0 |
| 0 | ? | 0 | 0 | 0 | 0 | 0 | - | 0 | 1 | - | - |
| ? | - | 0 | 0 | ? | ? | 0 | 0 | 1 | 0 | - | - |
| - | 0 | 1 | 0 | 0 | 1 | 0 | 0 | 3 | 1 | 0 | 0 |
| 0 | 0 | 0 | 0 | 0 | 0 | 0 | 0 | 0 | 0 | 2 | 0 |
| 0 | 0 | 0 | 0 | 1 | - | - | - | - | - | 0 | 0 |
| 0 | 1 | 0 | 0 | 1 | 1 | 2 | 0 | 0 | 0 | - | - |
| - | 0 | 0 | 1 | 0 | 0 | 1 | 0 | - | 0 | 0 | ? |

|   |   |   |   |   |   |   |   |   |   |   |   |
|---|---|---|---|---|---|---|---|---|---|---|---|
| 0 | 0 | 0 | 0 | 0 | 0 | - | - | - | 0 | 0 | - |
| 0 | 0 | 3 | 0 | 0 | 0 | 0 | - | - | 0 | 0 | 0 |
| - | 1 | 0 | 0 | 0 | 0 | - | 0 | 0 | - | - | 0 |
| 0 | 0 | 0 | 0 | 0 | 0 | 2 | 1 | 0 | - | - | 0 |
| - | 0 | 0 | 0 | 0 | 0 | 0 | 0 | - | - | - | 0 |
| - | 0 | 3 | 1 | - | ? | ? | ? | ? | 0 | - | 0 |
| 0 | 0 | 1 | 0 | 0 | 0 | 0 | - | 0 | 0 | 0 | 1 |
| - | - | 0 | ? | ? | ? | ? | ? | ? | ? | ? | ? |
| ? | ? | ? | ? | ? | ? | ? | ? | ? | ? | ? | ? |
| ? | ? | ? | ? | - | - | ? | 0 | ? | ? | ? | ? |
| ? | ? | ? | ? | ? | ? | ? | ? | ? | ? | ? | ? |
| ? | 0 | 0 | ? | ? | 0 | ? | 0 | ? | 0 | ? | ? |
| ? | 3 | 0 | 1 | ? | 0 | ? | - | - | 0 | - | 0 |
| 1 | 0 | 0 | - | ? | 0 | 0 | ? | - | ? | 0 | - |
| - | 0 | 0 | ? | 1 | 0 | 0 | 0 | 0 | 0 | 3 | 1 |
| 0 | 0 | ? | ? | 0 | ? | ? | 0 | ? | 0 | 0 | 2 |
| 0 | ? | 0 |   |   |   |   |   |   |   |   |   |

*Amia calva*

|   |   |   |     |   |   |   |   |   |   |   |   |
|---|---|---|-----|---|---|---|---|---|---|---|---|
| 3 | 0 | 0 | 1   | - | - | - | - | - | 0 | - | - |
| 0 | - | - | 0   | 0 | - | - | 0 | 1 | 0 | 2 | 1 |
| 1 | 1 | 0 | 0   | 0 | 1 | 1 | 2 | 0 | 1 | 1 | 1 |
| 1 | 1 | 0 | 1   | 1 | 0 | 0 | 1 | 0 | 0 | 1 | 0 |
| 1 | 2 | 0 | 0   | 1 | 0 | - | 1 | 0 | 1 | 0 | 0 |
| 0 | 0 | 1 | 0   | 0 | 0 | 0 | 1 | 0 | 1 | - | - |
| 0 | 0 | 0 | 0   | 0 | - | 0 | 0 | 2 | 1 | 1 | 0 |
| 2 | 0 | 0 | 0   | 2 | 0 | 0 | 0 | 2 | 0 | 0 | 1 |
| 0 | 0 | 0 | 1   | 0 | 0 | 1 | 0 | 0 | 0 | 0 | 0 |
| 2 | 1 | 1 | 0   | 1 | - | - | - | - | - | 1 | 0 |
| 0 | 1 | 3 | 0&1 | 2 | 0 | 2 | 0 | 1 | 0 | - | - |
| - | 0 | 0 | 2   | 1 | 0 | 0 | 1 | 4 | 1 | 1 | - |
| - | - | - | -   | - | - | 0 | 1 | 1 | 0 | 1 | 1 |
| 0 | 1 | 0 | 0   | 1 | 3 | 1 | 0 | 0 | 0 | 0 | 1 |
| 0 | 1 | 2 | 0   | 0 | 1 | 0 | 0 | 0 | 0 | 0 | 0 |
| 0 | 0 | 0 | 0   | 0 | 0 | 0 | 2 | 0 | 0 | - | 0 |
| - | 0 | 0 | 0   | 0 | 0 | 1 | 2 | 1 | 1 | 1 | 1 |
| 0 | 1 | 2 | 1   | 0 | 1 | 1 | 2 | 1 | 1 | 0 | 1 |
| 0 | 0 | 0 | 0   | 1 | 0 | 1 | 0 | 2 | 0 | 0 | 1 |
| 2 | - | 2 | 0   | 0 | 0 | 0 | 1 | 1 | 1 | 0 | 0 |
| 0 | - | 0 | 0   | 0 | 0 | 0 | 0 | 0 | 0 | 1 | 0 |
| 0 | 0 | 0 | 0   | 0 | 0 | 0 | 1 | 0 | 0 | 0 | 2 |
| 1 | 3 | 1 | 0   | 0 | 1 | 0 | 0 | 0 | 0 | - | - |
| - | 1 | 1 | 0   | 0 | 3 | 2 | 0 | 2 | 0 | 0 | 0 |
| 0 | 2 | 1 | 0   | - | 2 | 0 | 0 | 0 | 2 | - | 1 |
| 3 | 2 | 0 | 0   | 1 | 0 | 2 | 2 | 1 | 1 | 1 | 3 |
| 3 | 0 | 1 | -   | 0 | 0 | 0 | 0 | 0 | 0 | 1 | 0 |
| 1 | 1 | 0 | 1   | 1 | 0 | 0 | 0 | 0 | 1 | 0 | 0 |
| 1 | 0 | 0 |     |   |   |   |   |   |   |   |   |

†*Amia pattersoni*

|   |   |   |   |   |   |   |   |   |   |   |   |
|---|---|---|---|---|---|---|---|---|---|---|---|
| 3 | 0 | 0 | 1 | - | - | - | - | - | 0 | - | - |
| ? | ? | ? | ? | 0 | ? | ? | ? | ? | ? | 2 | ? |
| 1 | ? | ? | 0 | 0 | ? | ? | 2 | 0 | 1 | 1 | 1 |

|   |   |   |   |   |   |   |   |   |   |   |   |
|---|---|---|---|---|---|---|---|---|---|---|---|
| 1 | 1 | ? | ? | 1 | 0 | ? | ? | ? | 0 | 1 | 0 |
| 1 | 2 | 0 | 0 | 1 | ? | - | 1 | 0 | 1 | 0 | 0 |
| 0 | ? | 1 | 0 | 0 | ? | 0 | 1 | 0 | 1 | - | - |
| 0 | 0 | ? | ? | ? | ? | ? | ? | ? | 1 | 1 | 0 |
| ? | ? | ? | 0 | 2 | 0 | 0 | 0 | 1 | 0 | 0 | ? |
| 0 | 0 | 0 | 0 | 0 | 0 | 1 | 0 | 0 | 0 | 0 | 0 |
| 2 | 1 | 1 | 0 | 1 | - | - | - | - | - | 1 | 0 |
| 0 | 1 | 2 | 0 | 1 | 0 | 2 | 0 | 1 | 0 | - | - |
| - | 0 | 0 | 2 | 1 | 0 | 0 | 1 | 4 | 1 | 1 | - |
| - | - | - | - | - | - | 0 | ? | 1 | 0 | 1 | 1 |
| 0 | 1 | 0 | 0 | 1 | 3 | 1 | 0 | 0 | 0 | 0 | 1 |
| 0 | 1 | ? | 0 | 0 | 1 | 0 | ? | 0 | 0 | 0 | 0 |
| 0 | 0 | 0 | 0 | ? | ? | 2 | 0 | 0 | - | 0 | 0 |
| - | 0 | 0 | 0 | 0 | 0 | 2 | 1 | 1 | 1 | 1 | 1 |
| 0 | 1 | 2 | 1 | 1 | ? | ? | ? | ? | ? | ? | ? |
| 0 | ? | 0 | 0 | ? | ? | 0 | 0 | 2 | 0 | 0 | 1 |
| 2 | - | 2 | 0 | 0 | 0 | 0 | 1 | 1 | ? | ? | 0 |
| 0 | - | 0 | 0 | 0 | 0 | 0 | 0 | 0 | 0 | 1 | ? |
| ? | ? | ? | - | 0 | 0 | 1 | 0 | 0 | ? | 4 | 4 |
| ? | ? | ? | 0 | 0 | 1 | 0 | 0 | 0 | - | - | - |
| - | 1 | 1 | 0 | 0 | 1 | 2 | ? | 0 | 0 | 0 | 0 |
| 0 | 2 | 1 | 0 | - | 2 | 0 | 0 | 0 | 2 | - | 1 |
| 3 | 2 | 0 | ? | ? | 0 | 2 | ? | ? | ? | ? | 3 |
| 3 | 0 | 1 | - | 0 | 0 | 0 | 0 | 0 | 0 | 1 | 0 |
| 0 | 1 | ? | ? | 1 | ? | 0 | ? | ? | ? | 0 | 0 |
| ? | 0 | 0 |   |   |   |   |   |   |   |   |   |

†*Amia scutata*

|   |   |   |   |   |   |   |   |   |   |   |   |
|---|---|---|---|---|---|---|---|---|---|---|---|
| 3 | 0 | 0 | 1 | - | - | - | - | - | 0 | - | - |
| ? | ? | ? | ? | 0 | ? | ? | ? | ? | ? | 2 | ? |
| 1 | ? | ? | ? | ? | ? | ? | ? | 0 | 1 | 1 | 1 |
| 1 | 1 | 0 | ? | 1 | 0 | ? | ? | ? | 0 | 1 | 0 |
| 1 | ? | ? | ? | ? | ? | ? | ? | ? | 1 | 0 | ? |
| 0 | ? | 1 | 0 | 0 | ? | ? | ? | 0 | 1 | - | - |
| 0 | ? | ? | ? | ? | ? | ? | ? | 2 | 1 | 1 | 0 |
| ? | ? | ? | ? | ? | 0 | 0 | 0 | 2 | 0 | 0 | 1 |
| 0 | 0 | 0 | 0 | 0 | 0 | 1 | 0 | 0 | 0 | 0 | 0 |
| 2 | 1 | 1 | 0 | 1 | - | - | - | - | - | 1 | 0 |
| 0 | 1 | 3 | 0 | 2 | 0 | 2 | 0 | 1 | 0 | - | - |
| - | 0 | 0 | 2 | 1 | 0 | 0 | 1 | 4 | 1 | 1 | - |
| - | - | - | - | - | - | 0 | ? | 1 | 0 | 1 | 1 |
| 1 | 1 | 0 | 0 | 1 | 3 | 1 | 0 | 0 | 0 | 0 | 1 |
| 0 | 1 | 2 | 0 | 0 | 1 | 0 | 0 | 0 | 0 | 0 | 0 |
| 0 | 0 | 0 | 0 | 0 | 0 | 2 | 0 | 0 | - | 0 | 0 |
| - | 0 | 0 | 0 | 0 | 1 | 2 | 1 | 1 | 1 | 1 | 1 |
| 0 | 1 | 2 | 1 | 1 | ? | ? | ? | ? | ? | ? | ? |
| 0 | ? | 0 | 0 | ? | 0 | 0 | 0 | 2 | 0 | 0 | 1 |
| 2 | - | 2 | 0 | 0 | 0 | 0 | 1 | 1 | 1 | 0 | 0 |
| 0 | - | 0 | 0 | 0 | 0 | 0 | 0 | 0 | 0 | 1 | 0 |
| 0 | 0 | 0 | 0 | 0 | 0 | 1 | 0 | 0 | ? | 4 | 4 |
| 1 | 3 | 1 | 0 | 0 | 1 | 0 | 0 | 0 | - | - | - |
| - | 1 | 1 | 0 | 0 | 3 | 2 | ? | 2 | 0 | 0 | 0 |

|                             |   |   |   |   |   |   |     |     |   |   |   |
|-----------------------------|---|---|---|---|---|---|-----|-----|---|---|---|
| 0                           | 2 | 1 | 0 | - | 2 | 0 | 0   | 0   | 2 | - | 1 |
| 3                           | 2 | 0 | 0 | 1 | 0 | 2 | 2   | 0&1 | 1 | 1 | 3 |
| 3                           | 0 | 1 | - | 0 | 0 | 0 | 0   | 0   | 0 | 1 | 0 |
| 1                           | 1 | ? | ? | 1 | ? | 0 | 0   | 0   | 1 | 0 | 0 |
| 1                           | 0 | 0 |   |   |   |   |     |     |   |   |   |
| † <i>Amiopsis lepidota</i>  |   |   |   |   |   |   |     |     |   |   |   |
| 0                           | 0 | 1 | 1 | - | - | - | -   | -   | 0 | - | - |
| ?                           | ? | ? | ? | 0 | ? | ? | ?   | ?   | ? | ? | ? |
| ?                           | ? | ? | ? | ? | ? | ? | ?   | ?   | ? | ? | ? |
| ?                           | ? | ? | ? | ? | 0 | ? | ?   | ?   | ? | 1 | ? |
| ?                           | ? | ? | ? | ? | ? | ? | ?   | ?   | ? | ? | ? |
| ?                           | ? | ? | 0 | 0 | ? | 0 | ?   | 0   | 1 | - | - |
| 0                           | ? | ? | ? | ? | ? | 0 | 0   | 2   | 1 | 1 | 0 |
| ?                           | ? | 0 | ? | ? | 0 | 0 | 0   | 1   | 0 | 0 | ? |
| ?                           | 0 | 0 | 2 | 1 | 1 | 0 | 0   | 0   | 3 | 1 | 0 |
| ?                           | 1 | 0 | 0 | 0 | 1 | 2 | 0   | 0   | 0 | 3 | 0 |
| 0                           | 1 | ? | 1 | 1 | 0 | 3 | 0   | 1   | 0 | - | - |
| -                           | 0 | 0 | 2 | 1 | 0 | 1 | 1   | 4   | 1 | 0 | 0 |
| -                           | - | 0 | 0 | - | 0 | 0 | 1   | ?   | 0 | 1 | 1 |
| 1                           | 1 | 0 | 1 | 1 | 1 | 1 | 0   | 0   | 0 | 0 | 1 |
| 0                           | 1 | 1 | 0 | ? | 1 | 0 | 0   | 0   | ? | 0 | 0 |
| 0                           | 0 | 0 | 0 | 0 | 0 | 2 | 0   | 0   | - | 0 | 0 |
| -                           | 0 | 0 | 0 | 0 | 1 | 2 | 1   | 1   | 1 | 1 | 1 |
| 0                           | 1 | 2 | 1 | 1 | ? | ? | ?   | ?   | ? | ? | ? |
| 3                           | ? | 0 | 0 | 1 | ? | 1 | 0   | 2   | 0 | 0 | 1 |
| 1                           | - | 0 | 0 | 0 | 0 | 0 | 1   | 1   | 1 | 0 | 0 |
| 0                           | - | 0 | 0 | 0 | 0 | 0 | 0   | 0   | 1 | 1 | 0 |
| 0                           | 0 | 0 | 0 | 0 | 0 | 1 | 0&1 | 0   | 0 | ? | 4 |
| 1                           | 3 | 1 | 0 | 0 | 0 | 0 | 0   | 0   | - | - | - |
| -                           | 1 | 1 | 0 | 0 | 3 | 3 | ?   | 3   | 0 | 0 | 0 |
| 0                           | 2 | 1 | 0 | - | 1 | 0 | 0   | 0   | 0 | 1 | 1 |
| 0                           | 0 | 0 | 1 | 1 | 0 | ? | 1   | 1   | 1 | 1 | 3 |
| 3                           | 0 | 1 | 1 | 0 | 0 | 0 | 0   | 0   | 0 | ? | 0 |
| 1                           | 1 | ? | ? | 0 | ? | 0 | ?   | 0   | 1 | 0 | 0 |
| 1                           | 0 | 0 |   |   |   |   |     |     |   |   |   |
| † <i>Amiopsis woodwardi</i> |   |   |   |   |   |   |     |     |   |   |   |
| 0                           | 0 | 1 | 1 | - | - | - | -   | -   | 0 | - | - |
| ?                           | ? | ? | ? | 0 | ? | ? | ?   | ?   | ? | ? | ? |
| ?                           | ? | ? | ? | ? | ? | ? | ?   | ?   | ? | ? | ? |
| 1                           | ? | ? | ? | ? | 0 | ? | ?   | ?   | ? | 1 | ? |
| ?                           | ? | ? | ? | ? | ? | ? | ?   | ?   | ? | 1 | 0 |
| ?                           | ? | 1 | 0 | 0 | 0 | 0 | 1   | 0   | 1 | - | - |
| 0                           | 0 | ? | ? | ? | ? | ? | ?   | ?   | ? | 1 | 0 |
| ?                           | ? | ? | ? | ? | 0 | 0 | 0   | 1   | 0 | 0 | 1 |
| ?                           | 0 | 1 | 2 | 1 | 1 | 0 | 0   | ?   | ? | 1 | 0 |
| ?                           | ? | 0 | 0 | 0 | ? | 1 | 0   | 0   | 0 | 3 | 1 |
| 0                           | 1 | 1 | 1 | 1 | 0 | ? | ?   | 1   | 0 | - | - |
| -                           | 0 | 0 | 2 | 1 | 0 | ? | ?   | ?   | 1 | ? | ? |
| ?                           | ? | ? | ? | ? | ? | 0 | 1   | ?   | 0 | 1 | 1 |
| 0                           | 1 | 0 | 1 | 1 | 1 | 1 | 0   | 0   | 0 | 0 | 1 |
| 0                           | 1 | ? | 0 | ? | 1 | 0 | 0   | 0   | ? | 0 | 0 |

|   |   |   |   |   |   |   |   |     |   |   |   |
|---|---|---|---|---|---|---|---|-----|---|---|---|
| 0 | 0 | 0 | 0 | 0 | 0 | 2 | 0 | 0   | - | 0 | 0 |
| - | 0 | 0 | 0 | 0 | 0 | 2 | 1 | ?   | ? | 1 | 1 |
| 0 | 1 | 2 | 1 | 1 | ? | ? | ? | ?   | ? | ? | ? |
| 3 | ? | 0 | 0 | 1 | ? | 0 | 0 | 2   | 0 | 0 | 1 |
| 1 | - | 0 | 0 | 0 | 0 | 0 | 1 | 1   | 1 | 0 | 0 |
| 0 | - | 0 | 0 | 0 | 0 | 0 | 0 | 0   | 0 | 1 | 0 |
| 0 | 0 | 0 | 0 | 0 | 0 | 1 | 0 | 0&1 | ? | 4 | 4 |
| 1 | 3 | 1 | 0 | 0 | 0 | 0 | 0 | 0   | - | - | - |
| - | 1 | 1 | 0 | 0 | 3 | ? | ? | 3   | 0 | 0 | 0 |
| 0 | ? | 1 | 0 | - | 1 | 0 | 0 | 0   | ? | ? | 1 |
| 0 | ? | 0 | 1 | 1 | 0 | ? | 1 | 1   | 1 | 1 | 3 |
| ? | 0 | 1 | - | 0 | 0 | 0 | ? | ?   | ? | 0 | 0 |
| 0 | 1 | ? | ? | 0 | ? | 0 | ? | ?   | 1 | 0 | 0 |
| 1 | 0 | 0 |   |   |   |   |   |     |   |   |   |

†*Anaethalion angustus*

|   |   |   |   |   |   |     |   |   |   |   |   |
|---|---|---|---|---|---|-----|---|---|---|---|---|
| 0 | 0 | 1 | 2 | 0 | - | -   | - | - | 0 | - | - |
| ? | ? | ? | 1 | 1 | ? | ?   | ? | ? | ? | ? | ? |
| ? | ? | ? | ? | ? | 1 | 1   | ? | ? | ? | ? | ? |
| 0 | ? | ? | 1 | 0 | 0 | 0   | 0 | 1 | ? | 1 | 2 |
| ? | 1 | 0 | ? | ? | ? | ?   | 1 | ? | 1 | 1 | 0 |
| 0 | 2 | 1 | 0 | 0 | 0 | 0   | 0 | 1 | 0 | 1 | - |
| 1 | 3 | 1 | ? | ? | ? | 1   | ? | 4 | 1 | 0 | 2 |
| 0 | ? | 0 | 0 | ? | 0 | ?   | 0 | ? | 1 | 1 | ? |
| ? | 0 | ? | 2 | ? | ? | 0   | 0 | 0 | ? | 2 | ? |
| ? | 1 | ? | 0 | 0 | 0 | 3   | - | 0 | 0 | ? | 0 |
| 0 | 0 | ? | 1 | ? | 0 | ?   | ? | 0 | 0 | - | - |
| - | 0 | 0 | 0 | 0 | 0 | 1   | 2 | ? | 1 | 1 | - |
| - | - | - | - | - | - | 0   | - | - | 0 | 1 | 0 |
| 1 | 1 | 1 | 0 | 0 | 2 | 2   | - | 0 | 1 | 0 | 1 |
| 4 | 0 | 3 | 1 | 1 | 4 | -   | 1 | 0 | 1 | 1 | 0 |
| 0 | 2 | 0 | 0 | - | - | 3   | 0 | 0 | 0 | 1 | 0 |
| - | 0 | 1 | 0 | 0 | 2 | 4   | 1 | 1 | 0 | 1 | 1 |
| 0 | 0 | 1 | 1 | 2 | ? | ?   | ? | ? | ? | ? | 0 |
| ? | ? | 0 | 0 | 1 | 0 | 0   | 0 | 1 | 1 | 1 | 0 |
| - | 1 | ? | ? | 0 | 0 | 0   | ? | 1 | 1 | 1 | 1 |
| 1 | 1 | 0 | 0 | 0 | 0 | 0&1 | 0 | 0 | 0 | 1 | ? |
| ? | ? | 0 | 1 | 0 | 0 | 2   | 1 | 0 | ? | 0 | 3 |
| 1 | 1 | 0 | 1 | 0 | 0 | 1   | 0 | 1 | 1 | 0 | 1 |
| 1 | 0 | 0 | ? | 1 | 2 | 3   | ? | ? | 2 | 0 | 0 |
| 1 | ? | 1 | ? | - | 2 | 1   | 1 | 1 | 1 | 1 | 1 |
| 0 | 0 | 1 | 0 | 1 | 0 | 0   | ? | ? | 1 | 1 | 3 |
| ? | 0 | 1 | ? | 0 | ? | ?   | 0 | ? | ? | 0 | 0 |
| 0 | 2 | 1 | - | 0 | 0 | 1   | ? | 0 | 1 | 0 | 2 |
| 1 | ? | 0 |   |   |   |     |   |   |   |   |   |

†*Annaichthys pontegiurinenensis*

|   |   |   |   |   |   |   |   |   |   |   |   |
|---|---|---|---|---|---|---|---|---|---|---|---|
| 0 | 0 | 1 | 0 | - | 0 | 0 | ? | ? | 0 | 0 | - |
| ? | ? | ? | ? | 0 | - | - | ? | ? | ? | ? | ? |
| ? | ? | ? | ? | ? | ? | ? | ? | ? | ? | ? | ? |
| 1 | ? | ? | ? | ? | ? | ? | ? | ? | ? | 0 | - |
| ? | ? | ? | ? | ? | ? | ? | ? | ? | ? | ? | ? |
| ? | ? | ? | 0 | 0 | ? | 0 | ? | 2 | ? | ? | ? |

|   |   |   |   |   |   |   |   |   |   |   |   |   |
|---|---|---|---|---|---|---|---|---|---|---|---|---|
| ? | 0 | 0 | ? | ? | ? | ? | ? | ? | ? | 1 | ? | ? |
| ? | ? | ? | ? | ? | 0 | 0 | 0 | - | ? | ? | - | ? |
| 0 | 0 | - | - | - | 1 | ? | ? | 0 | 0 | 0 | 2 | 1 |
| 1 | 0 | 0 | 0 | ? | ? | ? | ? | ? | ? | ? | ? | ? |
| ? | ? | 1 | 1 | 1 | 1 | 2 | 0 | 0 | 0 | 0 | - | - |
| - | 0 | 0 | 0 | 0 | ? | ? | 1 | 2 | 1 | 0 | 0 | 1 |
| ? | 1 | 0 | 0 | - | 0 | 0 | - | - | 0 | 1 | ? | ? |
| 2 | 1 | 1 | 0 | 0 | 2 | 2 | - | 0 | 1 | ? | ? | 1 |
| 0 | 1 | 3 | 0 | ? | 4 | - | ? | ? | 0 | ? | ? | 0 |
| ? | ? | ? | ? | - | ? | 2 | 0 | 0 | - | 0 | 0 | 1 |
| 1 | 1 | ? | 0 | 0 | 2 | 1 | 1 | 1 | 1 | 1 | 0 | 1 |
| ? | 0 | 2 | ? | ? | ? | ? | ? | ? | ? | ? | ? | ? |
| ? | ? | ? | 0 | ? | ? | 0 | - | 0 | 1 | 0 | ? | ? |
| - | - | ? | ? | ? | ? | ? | ? | ? | ? | ? | ? | 0 |
| ? | ? | - | ? | ? | ? | ? | ? | ? | ? | ? | ? | ? |
| ? | ? | ? | ? | - | - | ? | ? | ? | ? | ? | ? | ? |
| ? | ? | ? | ? | ? | ? | ? | ? | ? | ? | ? | ? | ? |
| ? | 0 | ? | ? | ? | 1 | ? | 0 | ? | 0 | 0 | ? | ? |
| 0 | 1 | 0 | 0 | 1 | 0 | 0 | 1 | 1 | 0 | 0 | ? | ? |
| ? | 0 | ? | ? | ? | 0 | ? | ? | ? | ? | ? | ? | ? |
| ? | ? | ? | 2 | ? | ? | ? | 0 | ? | ? | ? | ? | ? |
| 1 | ? | ? | ? | ? | ? | ? | ? | ? | ? | ? | ? | ? |
| ? | ? | 1 |   |   |   |   |   |   |   |   |   |   |

†*Araripelepidotes temnurus*

|   |   |   |   |   |   |   |   |   |   |   |   |   |
|---|---|---|---|---|---|---|---|---|---|---|---|---|
| 2 | 0 | 1 | 0 | - | 1 | 0 | 1 | 2 | 0 | 0 | - |   |
| ? | ? | ? | ? | ? | ? | ? | 0 | 1 | 1 | ? | ? | 2 |
| 1 | 0 | - | 2 | ? | 1 | 0 | ? | ? | ? | ? | ? | 1 |
| 1 | 0 | ? | ? | 0 | 0 | 0 | 0 | 0 | 0 | ? | ? | ? |
| ? | 3 | ? | ? | ? | ? | ? | ? | ? | ? | ? | ? | ? |
| ? | 2 | 0 | 0 | 0 | ? | ? | ? | ? | 0 | ? | ? | ? |
| ? | 0 | 0 | ? | ? | ? | ? | ? | ? | 2 | ? | ? | ? |
| ? | ? | 0 | 0 | 0 | 1 | 0 | 0 | 4 | 0 | 0 | ? | ? |
| 0 | 0 | 0 | 1 | 0 | 0 | 0 | 0 | 0 | 5 | 1 | 0 | 0 |
| ? | 1 | 0 | ? | 0 | 1 | 2 | 0 | 1 | 3 | 4 | 0 | ? |
| 0 | 0 | 2 | 1 | 1 | 1 | 0 | 0 | 0 | 1 | 0 | ? | ? |
| 0 | 0 | ? | ? | ? | ? | ? | ? | ? | ? | 0 | 2 | ? |
| 0 | 0 | 0 | 0 | 0 | 0 | ? | ? | ? | 0 | 1 | 2 | ? |
| 2 | 1 | 0 | 0 | 0 | 1 | 0 | - | - | 0 | 0 | 0 | 0 |
| - | ? | ? | ? | ? | ? | ? | ? | ? | ? | ? | ? | 1 |
| 1 | - | - | - | ? | ? | - | 0 | - | - | - | - | 0 |
| - | 0 | 0 | 0 | 0 | 0 | 4 | 1 | 1 | 2 | 1 | 1 | 1 |
| 0 | 0 | ? | 0 | - | ? | ? | ? | ? | 1 | 2 | 1 | ? |
| 3 | 0 | ? | 0 | ? | 0 | 0 | - | 0 | 0 | 0 | ? | ? |
| - | - | ? | ? | ? | ? | ? | ? | ? | ? | ? | ? | ? |
| ? | ? | - | ? | ? | ? | ? | ? | ? | ? | ? | ? | ? |
| ? | ? | ? | ? | - | - | ? | - | ? | ? | ? | ? | ? |
| ? | ? | ? | ? | 0 | ? | ? | ? | ? | ? | ? | ? | ? |
| ? | ? | 1 | 0 | ? | 3 | 2 | 2 | ? | 1 | 0 | 0 | ? |
| 0 | 0 | 0 | 0 | 2 | 0 | 0 | - | - | 0 | 0 | ? | ? |
| 0 | ? | ? | ? | ? | 0 | ? | ? | ? | 0 | 1 | 2 | ? |
| 1 | 2 | 0 | 2 | 1 | 1 | 0 | 0 | 1 | ? | ? | ? | ? |

|                                       |   |   |   |   |   |   |   |   |   |   |   |
|---------------------------------------|---|---|---|---|---|---|---|---|---|---|---|
| 0                                     | ? | ? | ? | ? | ? | 0 | ? | ? | 0 | 0 | ? |
| 0                                     | 0 | 0 |   |   |   |   |   |   |   |   |   |
| † <i>Archaeosemionotus connectens</i> |   |   |   |   |   |   |   |   |   |   |   |
| 0                                     | 0 | 0 | 0 | - | 1 | 0 | 1 | 0 | 1 | 0 | - |
| ?                                     | ? | ? | ? | ? | ? | ? | ? | ? | ? | ? | ? |
| ?                                     | ? | ? | ? | ? | ? | ? | ? | ? | ? | ? | ? |
| ?                                     | ? | ? | ? | ? | ? | ? | ? | ? | ? | 1 | 0 |
| ?                                     | ? | ? | ? | ? | ? | ? | ? | ? | ? | ? | ? |
| ?                                     | ? | ? | 0 | 0 | ? | ? | ? | 0 | 1 | - | - |
| 0                                     | 0 | ? | ? | ? | ? | ? | ? | ? | ? | ? | ? |
| ?                                     | ? | ? | ? | ? | ? | ? | ? | ? | ? | 0 | ? |
| 0                                     | ? | ? | ? | 0 | 0 | 0 | ? | ? | ? | ? | ? |
| ?                                     | ? | ? | 0 | 0 | ? | ? | 0 | 0 | 0 | ? | ? |
| ?                                     | ? | 0 | ? | 8 | 0 | 3 | 0 | 1 | 0 | - | - |
| -                                     | 0 | ? | ? | ? | ? | ? | ? | ? | ? | 0 | 2 |
| 0                                     | 0 | 0 | 0 | 0 | 0 | ? | 0 | 0 | 0 | 1 | 1 |
| 1                                     | 1 | 0 | 0 | 0 | 2 | 1 | 0 | 0 | 0 | 0 | 1 |
| 0                                     | 1 | ? | ? | ? | 0 | - | ? | 0 | 0 | 1 | 0 |
| 0                                     | 0 | 0 | 0 | 0 | ? | 2 | 0 | 0 | - | 0 | 0 |
| -                                     | 0 | 0 | 0 | 0 | 1 | 1 | 1 | 1 | 1 | 0 | 1 |
| 0                                     | ? | ? | 1 | 0 | ? | ? | ? | ? | ? | ? | ? |
| ?                                     | ? | ? | ? | ? | ? | ? | ? | ? | ? | ? | ? |
| ?                                     | ? | ? | ? | ? | ? | ? | ? | ? | ? | ? | ? |
| ?                                     | ? | ? | ? | ? | ? | ? | ? | ? | ? | ? | ? |
| ?                                     | ? | ? | ? | ? | ? | ? | ? | ? | ? | ? | ? |
| ?                                     | ? | ? | ? | ? | ? | ? | ? | ? | ? | ? | ? |
| ?                                     | ? | ? | ? | ? | ? | ? | ? | ? | ? | ? | ? |
| ?                                     | ? | ? | ? | ? | ? | ? | ? | ? | ? | ? | ? |
| ?                                     | 0 | ? | ? | ? | 1 | ? | 0 | ? | 0 | ? | ? |
| ?                                     | 2 | 0 | 0 | 1 | 0 | ? | - | - | 0 | 0 | ? |
| 0                                     | ? | ? | ? | ? | ? | ? | ? | ? | ? | 1 | 0 |
| 0                                     | 1 | 0 | 0 | ? | ? | ? | ? | ? | ? | ? | ? |
| 1                                     | ? | ? | ? | ? | ? | ? | ? | ? | ? | 0 | ? |
| 0                                     | 0 | ? |   |   |   |   |   |   |   |   |   |
| † <i>Aspidorhynchus acutirostris</i>  |   |   |   |   |   |   |   |   |   |   |   |
| 4                                     | 1 | 1 | 0 | - | 0 | 0 | 0 | - | 1 | 0 | - |
| ?                                     | ? | ? | ? | 0 | 0 | - | ? | ? | ? | 1 | 1 |
| ?                                     | ? | ? | ? | ? | 1 | 0 | ? | 0 | ? | ? | ? |
| 0                                     | ? | ? | 1 | 0 | 0 | 0 | 0 | 1 | ? | ? | ? |
| ?                                     | 1 | 0 | 0 | ? | ? | - | 1 | 1 | 1 | 1 | 0 |
| 0                                     | 0 | 1 | 0 | 0 | 0 | 0 | 0 | 0 | 0 | 1 | - |
| 0                                     | 0 | 0 | ? | ? | ? | 0 | 0 | ? | 1 | 0 | 2 |
| 1                                     | 0 | 1 | 0 | 2 | 0 | 0 | 0 | - | - | - | ? |
| ?                                     | 0 | - | - | - | - | - | 0 | 0 | 3 | 2 | 0 |
| 3                                     | ? | 0 | 1 | 0 | 1 | 3 | - | 0 | 0 | 2 | 0 |
| 0                                     | 0 | 1 | 1 | 6 | 0 | 2 | 0 | 0 | 0 | - | - |
| -                                     | 0 | 0 | 4 | 0 | 0 | 0 | 1 | ? | 1 | 0 | 1 |
| 0                                     | 0 | 1 | 0 | - | 0 | 0 | ? | ? | 0 | 1 | 1 |
| 1                                     | 2 | 2 | 0 | 0 | 1 | 1 | 1 | 1 | 1 | 0 | 1 |
| 0                                     | 1 | 1 | 0 | 0 | 3 | - | 0 | 0 | 0 | 0 | 0 |
| 0                                     | 2 | ? | 0 | 0 | 0 | 3 | 0 | 0 | 0 | 0 | 0 |
| -                                     | 0 | 0 | 0 | 0 | 0 | 4 | 1 | 1 | 1 | 1 | 1 |
| 0                                     | 0 | 3 | 0 | - | ? | ? | ? | ? | ? | ? | ? |



|   |   |   |   |   |   |   |   |   |   |   |     |
|---|---|---|---|---|---|---|---|---|---|---|-----|
| 0 | 0 | 0 | ? | ? | ? | 0 | 0 | 1 | 1 | 0 | ?   |
| ? | - | ? | ? | ? | 0 | ? | ? | ? | ? | ? | 0   |
| ? | ? | ? | 0 | 0 | 0 | 0 | 0 | 0 | 0 | 0 | ?   |
| ? | ? | 1 | - | ? | 0 | 1 | 0 | 0 | 0 | 4 | 4   |
| 0 | - | 0 | 2 | 0 | 0 | 0 | 0 | 1 | 2 | 1 | 2&3 |
| 0 | 0 | 0 | ? | 1 | 3 | 0 | 0 | ? | 0 | 0 | 0   |
| 1 | 2 | 1 | 0 | - | 2 | 0 | 1 | ? | 0 | 0 | 1   |
| 0 | 0 | ? | ? | 0 | 0 | 0 | ? | ? | 0 | 1 | 0   |
| 0 | 0 | 0 | 0 | ? | ? | ? | 0 | ? | 1 | 2 | ?   |
| 1 | ? | ? | ? | 0 | 0 | 0 | ? | ? | 0 | 0 | 2   |
| 0 | 3 | 0 |   |   |   |   |   |   |   |   |     |

*Atractosteus spatula*

|   |   |   |   |   |   |   |   |   |   |   |   |
|---|---|---|---|---|---|---|---|---|---|---|---|
| 4 | 0 | 0 | 0 | - | 1 | 1 | 1 | 1 | 0 | 0 | - |
| 0 | - | - | 0 | 0 | - | - | 0 | 1 | 0 | ? | 2 |
| 1 | 0 | - | 1 | 0 | 0 | - | 1 | 1 | - | - | 1 |
| 1 | 0 | 6 | 1 | 1 | - | 1 | 0 | 0 | 1 | 1 | 0 |
| 2 | 2 | 1 | 1 | - | - | 1 | 1 | 1 | 1 | 0 | 1 |
| - | 4 | 0 | 1 | 1 | 0 | 1 | 3 | 4 | 0 | 0 | 1 |
| - | 0 | 0 | 0 | 1 | 1 | 0 | 0 | 1 | 1 | 0 | 3 |
| 3 | 0 | 0 | 0 | 2 | 2 | 0 | 0 | 4 | 0 | 0 | 0 |
| 1 | 0 | 0 | 0 | 1 | 1 | 0 | 1 | 0 | 4 | 1 | 0 |
| 0 | 1 | 1 | 1 | 0 | 1 | 2 | 0 | 1 | 1 | 4 | 1 |
| 1 | 0 | 2 | 0 | 3 | 1 | 0 | 0 | 0 | 1 | 3 | 0 |
| 1 | 1 | 0 | 2 | 1 | 0 | 0 | 1 | 0 | 1 | 0 | 3 |
| 0 | 2 | 0 | 0 | 0 | 0 | 0 | 1 | 2 | 1 | - | - |
| - | - | - | - | - | - | 0 | - | - | 0 | 0 | 1 |
| 2 | 1 | 1 | 0 | 0 | 1 | 1 | 0 | 1 | 1 | 0 | 1 |
| 0 | 1 | 0 | 0 | 0 | 4 | 3 | 0 | 0 | 1 | 0 | 0 |
| - | 1 | 0 | 0 | 0 | 0 | 0 | 1 | 0 | 3 | 0 | 0 |
| - | 0 | 4 | 0 | - | 0 | 1 | 1 | 1 | 1 | 2 | 1 |
| 0 | 0 | 1 | - | ? | 1 | 0 | 1 | 2 | 0 | 0 | 0 |
| 0 | - | 2 | 0 | ? | 1 | 0 | 0 | 1 | 1 | 0 | 0 |
| 0 | - | 1 | 0 | 0 | 0 | 0 | 0 | 0 | 0 | 0 | 0 |
| 0 | 0 | 0 | 0 | 0 | 0 | 1 | 0 | 0 | 0 | 0 | 0 |
| 1 | 0 | 0 | 0 | 0 | 0 | 0 | 0 | 0 | - | - | - |
| - | 1 | 1 | 0 | 0 | 3 | 2 | 3 | 2 | 1 | 0 | 0 |
| 0 | 0 | 0 | 0 | 2 | 0 | 0 | - | ? | 0 | 0 | 1 |
| 0 | 2 | 0 | 0 | 0 | 0 | 2 | 1 | 0 | 0 | 1 | 1 |
| 1 | 0 | 0 | 2 | 2 | 0 | 0 | 0 | 1 | 1 | 2 | 1 |
| 0 | 6 | 0 | 1 | 0 | 0 | 0 | 0 | 0 | 0 | 0 | 0 |
| 0 | 0 | 0 |   |   |   |   |   |   |   |   |   |

*Brycon meeki*

|   |   |   |   |   |   |   |   |   |   |   |   |
|---|---|---|---|---|---|---|---|---|---|---|---|
| 0 | 0 | 1 | 2 | 0 | - | - | - | - | 0 | - | - |
| 1 | 2 | 2 | 1 | 1 | 1 | 1 | ? | 0 | - | 3 | 2 |
| 1 | 0 | - | 0 | 1 | 1 | 1 | 2 | 0 | 1 | 0 | 1 |
| 0 | 0 | 3 | 1 | 0 | 0 | 1 | 0 | 1 | 0 | ? | ? |
| 2 | 1 | ? | 0 | 0 | 1 | ? | 0 | - | 1 | 1 | 0 |
| 1 | 5 | 0 | 0 | 0 | ? | 0 | 0 | 2 | 0 | 1 | - |
| 0 | 4 | 1 | 1 | 0 | - | 1 | ? | 3 | 1 | 0 | 2 |
| 0 | 0 | 0 | 0 | 2 | 0 | 1 | 0 | 3 | 0 | 0 | ? |
| 1 | 1 | 0 | 2 | 1 | 0 | 0 | 0 | 1 | 2 | 2 | ? |

|   |   |   |   |   |   |   |   |   |   |   |   |
|---|---|---|---|---|---|---|---|---|---|---|---|
| ? | 1 | ? | 0 | 0 | 1 | 3 | - | 0 | 0 | 0 | 0 |
| 0 | 0 | 1 | 1 | 0 | 1 | 2 | 0 | 0 | 0 | - | - |
| - | 0 | 0 | 4 | 0 | 1 | 1 | 4 | - | 1 | 1 | - |
| - | - | - | - | - | - | 0 | - | - | 0 | 1 | - |
| 2 | 1 | 0 | 0 | 0 | 1 | 0 | - | - | 1 | 0 | 1 |
| 4 | 0 | 3 | 0 | 1 | 1 | 0 | 1 | 0 | 1 | 2 | 0 |
| 0 | 0 | 0 | - | - | ? | 3 | 0 | 0 | 0 | 0 | ? |
| ? | 1 | ? | 0 | 0 | 1 | 4 | 0 | - | - | 1 | 1 |
| 0 | 0 | 4 | 0 | - | 0 | 0 | 0 | 0 | 1 | 0 | 0 |
| 3 | 2 | 0 | 0 | 0 | 0 | 0 | 0 | ? | ? | 1 | 0 |
| - | 1 | 0 | 0 | 0 | 1 | 1 | ? | 1 | 1 | ? | 1 |
| 1 | 1 | 1 | 0 | 0 | 0 | 0 | 0 | 0 | 0 | 0 | 1 |
| 1 | 1 | 0 | 1 | 1 | 1 | ? | 2 | 1 | 0 | 3 | 4 |
| 1 | 1 | 0 | 1 | 0 | 2 | 0 | 0 | 1 | 2 | 1 | 2 |
| 3 | 0 | 0 | 1 | 0 | 2 | 3 | ? | 4 | 2 | 0 | 0 |
| 0 | 0 | 1 | 0 | - | 2 | 0 | 1 | ? | 2 | - | 1 |
| 0 | 0 | 0 | 1 | 1 | 0 | 0 | 1 | 0 | 1 | 1 | 3 |
| 3 | 0 | 1 | - | 2 | 0 | - | 0 | 0 | 1 | ? | 0 |
| 0 | 3 | 1 | - | 0 | 0 | 1 | 1 | ? | 1 | 0 | 2 |
| 1 | ? | ? |   |   |   |   |   |   |   |   |   |

†*Calamopleurus cylindricus*

|   |   |   |   |   |   |   |   |   |   |   |   |
|---|---|---|---|---|---|---|---|---|---|---|---|
| 2 | 0 | 0 | 1 | - | - | - | - | - | 0 | - | - |
| ? | ? | ? | ? | 0 | ? | ? | 1 | 1 | 0 | 2 | 2 |
| 1 | 1 | 0 | 0 | 0 | 1 | ? | 1 | 0 | 1 | 1 | 1 |
| 1 | 1 | 0 | 1 | 1 | 0 | 0 | 0 | 0 | 0 | 1 | 0 |
| 1 | 3 | 0 | 0 | 1 | 0 | - | 1 | 1 | 1 | 0 | 0 |
| 0 | 0 | 1 | 0 | 0 | 0 | 0 | 1 | 0 | 1 | - | - |
| 0 | 3 | 0 | ? | ? | ? | 0 | 0 | 2 | 1 | 1 | 0 |
| 2 | 0 | 1 | 0 | 2 | 0 | 0 | 0 | 1 | 0 | 0 | 1 |
| 2 | 0 | 0 | 0 | 1 | 1 | 1 | 0 | 0 | 2 | 2 | 0 |
| 3 | 1 | 0 | 0 | 0 | 1 | 0 | 1 | 0 | 0 | 3 | 0 |
| 0 | 0 | 4 | 0 | 2 | 0 | 2 | 0 | 0 | 0 | - | - |
| - | 0 | 0 | 2 | 1 | 0 | 0 | 1 | 4 | 1 | 1 | - |
| - | - | - | - | - | - | 0 | 1 | 1 | 0 | 1 | 1 |
| 0 | 1 | 3 | 1 | 1 | 1 | 1 | 0 | 0 | 1 | 0 | 1 |
| 0 | 1 | 2 | 0 | 0 | 1 | 0 | 0 | 0 | 0 | 0 | 0 |
| 0 | 0 | 0 | 4 | 0 | 0 | 2 | 0 | 0 | - | 0 | 0 |
| - | 0 | 0 | 0 | 0 | 1 | 2 | 1 | ? | 1 | 1 | 1 |
| 0 | 1 | 1 | 1 | 0 | ? | ? | ? | ? | ? | ? | ? |
| ? | ? | ? | 0 | ? | 0 | 1 | 0 | 2 | 0 | 0 | 1 |
| 2 | - | 0 | 0 | 0 | 0 | 0 | 0 | 1 | 1 | ? | 0 |
| 0 | - | 0 | 0 | 0 | 0 | 0 | 0 | 0 | 1 | 1 | 0 |
| 0 | 0 | 0 | 0 | 0 | 0 | 0 | 0 | 1 | ? | 3 | 3 |
| 1 | 3 | 1 | 0 | 0 | 0 | 0 | 0 | 0 | - | - | - |
| - | 1 | 1 | 0 | 0 | 3 | 2 | ? | 3 | 1 | 0 | 0 |
| 0 | 1 | 1 | 0 | - | ? | 0 | 2 | 2 | 2 | - | 1 |
| 0 | ? | 0 | 1 | 1 | 0 | 2 | ? | ? | ? | 1 | 3 |
| 3 | 0 | 1 | - | 0 | 0 | 1 | 0 | 0 | 1 | 1 | 0 |
| 0 | 1 | ? | ? | 0 | ? | 0 | 0 | ? | 1 | 0 | 0 |
| 1 | 0 | 0 |   |   |   |   |   |   |   |   |   |

†*Callipurbeckia minor*

|   |   |   |   |   |   |   |   |   |   |   |   |
|---|---|---|---|---|---|---|---|---|---|---|---|
| 0 | 0 | 0 | 0 | - | 2 | 0 | 1 | 2 | 0 | 1 | 1 |
| ? | ? | ? | ? | 0 | ? | ? | ? | ? | ? | ? | 2 |
| ? | ? | ? | ? | ? | ? | ? | ? | ? | ? | ? | ? |
| ? | ? | ? | ? | ? | ? | 0 | ? | ? | ? | 1 | 0 |
| 1 | ? | 1 | 0 | 0 | ? | 0 | ? | ? | ? | ? | ? |
| ? | 1 | 0 | 0 | 0 | ? | 0 | 0 | 3 | 0 | 0 | 1 |
| - | 0 | 0 | ? | ? | ? | ? | ? | ? | ? | 0 | 4 |
| ? | ? | ? | ? | ? | 0 | 0 | 0 | 4 | 0 | 0 | ? |
| ? | 0 | 0 | 2 | 1 | 1 | 0 | 1 | 0 | 5 | 1 | 0 |
| 3 | 1 | 1 | 0 | 0 | 1 | 1 | 0 | 0 | 0 | 3 | 0 |
| 0 | 0 | 0 | 1 | 7 | 0 | 0 | 0 | 0 | 1 | 2 | 2 |
| 0 | 0 | 0 | 3 | 1 | 0 | 0 | 1 | 0 | 1 | 0 | 1 |
| 0 | 0 | 1 | 0 | - | 0 | 0 | 1 | 1 | 0 | 1 | 1 |
| 4 | 3 | 2 | 0 | 0 | 1 | 1 | 0 | 0 | 1 | 0 | 1 |
| 0 | 1 | ? | 0 | ? | 1 | 1 | ? | 0 | ? | 0 | 0 |
| 0 | 0 | 0 | 1 | ? | ? | 2 | 0 | 1 | - | 0 | 0 |
| - | 0 | 0 | 0 | 0 | 0 | 1 | 1 | 1 | 3 | 1 | 1 |
| 0 | ? | ? | 0 | - | ? | ? | ? | ? | 1 | 1 | 0 |
| 0 | 0 | ? | 0 | ? | ? | 0 | ? | ? | ? | ? | ? |
| ? | ? | ? | 0 | ? | ? | ? | ? | ? | ? | ? | ? |
| ? | ? | ? | ? | ? | ? | ? | ? | ? | ? | ? | ? |
| ? | ? | ? | ? | ? | ? | ? | ? | ? | ? | ? | ? |
| ? | ? | ? | ? | ? | ? | ? | ? | ? | ? | ? | ? |
| ? | ? | ? | ? | ? | ? | ? | ? | ? | ? | ? | ? |
| ? | ? | ? | 0 | 0 | 3 | ? | 1 | ? | 1 | 0 | 0 |
| 0 | 1 | 0 | 0 | 1 | 0 | 0 | - | - | 0 | 0 | 1 |
| 0 | 0 | 0 | 0 | 0 | 0 | ? | ? | 1 | 0 | 1 | 2 |
| ? | 2 | 0 | 2 | 1 | 1 | 0 | 0 | 1 | 0 | 2 | ? |
| 1 | 4 | ? | ? | ? | ? | 0 | ? | 0 | 0 | 0 | ? |
| 0 | 0 | 0 |   |   |   |   |   |   |   |   |   |

†*Camerichthys lunae*

|   |   |   |   |   |   |   |   |   |   |   |   |
|---|---|---|---|---|---|---|---|---|---|---|---|
| 0 | 0 | ? | 0 | - | 1 | ? | ? | ? | ? | 1 | 0 |
| ? | ? | ? | ? | ? | ? | ? | ? | ? | ? | ? | ? |
| ? | ? | ? | ? | ? | ? | ? | ? | ? | ? | ? | ? |
| ? | ? | ? | ? | ? | ? | ? | ? | ? | ? | ? | ? |
| ? | ? | ? | ? | ? | ? | ? | ? | ? | ? | ? | ? |
| ? | ? | ? | 0 | 0 | ? | ? | ? | 1 | ? | ? | ? |
| ? | ? | ? | ? | ? | ? | ? | ? | ? | ? | ? | ? |
| ? | ? | ? | ? | ? | ? | ? | ? | ? | ? | ? | ? |
| ? | ? | ? | ? | ? | 1 | 0 | 1 | ? | ? | ? | ? |
| ? | 1 | ? | 0 | 0 | 1 | 2 | 0 | 0 | 1 | ? | 0 |
| ? | ? | 2 | 1 | 7 | 0 | 0 | 0 | 0 | 1 | 3 | 2 |
| 1 | 0 | 0 | 3 | 1 | 0 | 0 | ? | ? | ? | 0 | 3 |
| 1 | 0 | 0 | 0 | 1 | 0 | ? | ? | ? | 0 | 1 | 1 |
| 4 | 3 | 0 | ? | 0 | 1 | ? | ? | ? | 1 | 0 | 1 |
| 0 | 1 | ? | ? | ? | 1 | ? | ? | 0 | ? | ? | ? |
| 0 | 0 | 0 | 1 | 2 | ? | 2 | 0 | 0 | - | 0 | 0 |
| - | 0 | - | 0 | 1 | 0 | ? | 1 | 1 | 1 | 0 | 1 |
| 0 | 0 | ? | 0 | - | ? | ? | ? | ? | ? | ? | ? |
| ? | ? | ? | 0 | ? | ? | ? | ? | ? | ? | ? | ? |
| ? | ? | ? | ? | ? | ? | ? | ? | ? | ? | ? | ? |
| ? | ? | ? | ? | ? | ? | ? | ? | ? | ? | ? | ? |

|   |   |   |   |   |   |   |   |   |   |   |   |   |
|---|---|---|---|---|---|---|---|---|---|---|---|---|
| ? | ? | ? | ? | ? | ? | ? | ? | ? | ? | ? | ? | ? |
| ? | ? | ? | ? | ? | ? | ? | ? | ? | ? | ? | ? | ? |
| ? | ? | ? | ? | ? | ? | ? | ? | ? | ? | ? | ? | ? |
| ? | ? | ? | ? | ? | ? | ? | ? | ? | ? | ? | ? | ? |
| ? | ? | ? | ? | ? | ? | ? | ? | ? | ? | ? | ? | ? |
| ? | ? | ? | ? | ? | ? | ? | ? | ? | ? | ? | ? | ? |
| ? | ? | ? | ? | ? | ? | ? | ? | ? | ? | ? | ? | ? |
| ? | ? | ? | ? | ? | ? | ? | ? | ? | ? | ? | ? | ? |
| ? | ? | ? | ? | ? | ? | ? | ? | ? | ? | ? | ? | ? |

†*Catervariolus hornemani*

|   |   |   |   |   |   |   |   |   |   |   |     |   |
|---|---|---|---|---|---|---|---|---|---|---|-----|---|
| 0 | 0 | 0 | 0 | - | 0 | 0 | 0 | - | 0 | 0 | -   | - |
| 1 | 2 | 4 | ? | 1 | ? | - | ? | 0 | - | ? | ?   | 2 |
| 0 | ? | ? | 0 | ? | ? | ? | 1 | 0 | ? | ? | ?   | 0 |
| 0 | 0 | 3 | 1 | 0 | ? | 0 | 0 | 0 | 0 | 0 | 1   | 1 |
| ? | 1 | 1 | 0 | 0 | 0 | 0 | 1 | 1 | 1 | 1 | 1   | ? |
| 0 | 0 | 0 | 0 | 0 | 0 | 0 | ? | 1 | 0 | 1 | 1   | - |
| 0 | 3 | ? | ? | ? | ? | 0 | ? | 0 | 1 | ? | ?   | ? |
| 0 | 0 | 0 | 0 | ? | 0 | 0 | 0 | 0 | 4 | 0 | 0   | ? |
| 0 | 0 | 0 | 3 | 0 | 0 | 0 | 0 | 0 | 0 | 0 | 0&1 | 0 |
| ? | 1 | 0 | 0 | 0 | 1 | 1 | 0 | 0 | 0 | 0 | 3   | 0 |
| 0 | 0 | - | 3 | 0 | 0 | 2 | 0 | 0 | 0 | 0 | -   | - |
| - | 0 | 0 | ? | 0 | 0 | 1 | 1 | 2 | 1 | 0 | 0   | 2 |
| 0 | 0 | 0 | 0 | 0 | 0 | 1 | 0 | - | 0 | 1 | 1   | 1 |
| ? | 1 | 2 | 0 | 0 | 1 | 1 | 1 | 0 | 1 | ? | ?   | 1 |
| 0 | 1 | 1 | 0 | 0 | 1 | 0 | 0 | 0 | 1 | 0 | 0   | 0 |
| 0 | 0 | 0 | 0 | 0 | 0 | 2 | 0 | 0 | - | 0 | 0   | 0 |
| - | 0 | 0 | 0 | 0 | 0 | 4 | 1 | 1 | 1 | 1 | 1   | 1 |
| ? | ? | 3 | 1 | 0 | ? | ? | ? | ? | 1 | 0 | -   | 0 |
| 0 | 0 | 1 | 0 | ? | 0 | 0 | - | 0 | 1 | 0 | 0   | 1 |
| - | - | 0 | ? | ? | - | 1 | ? | ? | 1 | 1 | ?   | 1 |
| 0 | - | ? | 0 | 0 | 0 | 0 | 0 | 0 | 0 | 0 | 0   | 0 |
| 0 | 0 | 0 | 0 | - | - | 1 | 0 | 0 | ? | ? | 4   | 4 |
| 1 | 0 | 0 | 0 | 0 | 0 | 0 | 0 | 1 | 1 | 1 | 1   | 3 |
| 1 | 0 | 0 | 0 | ? | 2 | 2 | ? | ? | ? | 0 | 0   | 0 |
| 0 | 2 | 0 | 0 | 0 | 0 | 0 | 1 | 1 | 0 | 0 | 0   | 1 |
| 0 | 0 | ? | ? | 0 | 0 | 0 | ? | ? | 1 | 0 | 1   | 0 |
| ? | ? | 0 | 0 | 0 | 0 | 0 | 0 | 0 | 0 | 0 | 1   | 0 |
| ? | 2 | ? | ? | 0 | 0 | 1 | ? | ? | ? | 0 | 0   | ? |
| 0 | 0 | ? |   |   |   |   |   |   |   |   |     |   |

†*Caturus furcatus*

|   |   |   |   |   |   |   |   |   |   |   |   |   |
|---|---|---|---|---|---|---|---|---|---|---|---|---|
| 2 | 0 | 1 | 1 | - | - | - | - | - | 0 | - | - | - |
| ? | ? | ? | ? | 0 | ? | ? | ? | ? | ? | ? | 1 | 1 |
| 1 | ? | ? | 0 | 0 | 1 | 0 | ? | 0 | 1 | 2 | ? | ? |
| 1 | - | 3 | 1 | ? | ? | 0 | 0 | 0 | 0 | 0 | 1 | 0 |
| 1 | 3 | 0 | 0 | 2 | 0 | - | 1 | 1 | 1 | 1 | 0 | 0 |
| 0 | ? | ? | 0 | 0 | 0 | 0 | 1 | 0 | 1 | - | - | - |
| 0 | 0 | 0 | ? | ? | ? | 0 | ? | 2 | ? | ? | 1 | 0 |
| 2 | 0 | 1 | 0 | 1 | 0 | 0 | 0 | 1 | ? | ? | 2 | 1 |
| 2 | 0 | 1 | 2 | 0 | 0 | 1 | 0 | 0 | 3 | 1 | 1 | 0 |
| 2 | 1 | 0 | 0 | 0 | 1 | 0 | 1 | 0 | 0 | 3 | 1 | 1 |
| 0 | 1 | 4 | 0 | 1 | 0 | 2 | 0 | 0 | 0 | 0 | - | - |
| - | 0 | 0 | 2 | 1 | 0 | 1 | 1 | 4 | 1 | 0 | 0 | 1 |

|   |   |   |   |   |   |   |   |   |   |   |   |
|---|---|---|---|---|---|---|---|---|---|---|---|
| 0 | 0 | 1 | 0 | - | 0 | 0 | 0 | 0 | 0 | 1 | 1 |
| 1 | 2 | 3 | 1 | 1 | 1 | 1 | 0 | 0 | 1 | 0 | 1 |
| 0 | 1 | 1 | 0 | 0 | 1 | 0 | 0 | 0 | 0 | 0 | 0 |
| 0 | 0 | 0 | 4 | 0 | 0 | 2 | 0 | 0 | - | 0 | 0 |
| - | 0 | 0 | 0 | 0 | 0 | 4 | 1 | 2 | 0 | 1 | 1 |
| 1 | 1 | 0 | 1 | 0 | ? | ? | ? | ? | ? | ? | 1 |
| 3 | 0 | ? | 0 | 0 | 0 | 0 | - | 1 | 0 | 0 | 1 |
| - | - | 0 | 0 | 0 | 0 | 0 | ? | 1 | 0 | 0 | 0 |
| 0 | - | - | 0 | 0 | 1 | 0 | 1 | 1 | 0 | 0 | 0 |
| 0 | 0 | 0 | 0 | 1 | - | ? | 0 | 0 | ? | ? | 4 |
| 1 | 1 | 1 | 0 | 0 | - | 0 | 0 | 0 | - | - | - |
| - | 0 | 0 | 0 | 1 | 1 | 1 | 0 | 4 | 0 | 0 | 0 |
| 1 | 3 | 1 | 0 | - | 1 | ? | 1 | 1 | 0 | 0 | 1 |
| 0 | 0 | ? | ? | 0 | 0 | 0 | ? | ? | 0 | 1 | 0 |
| ? | 1 | 0 | 0 | 0 | 0 | 0 | 1 | 0 | 1 | 1 | 0 |
| 1 | ? | 0 | 1 | 0 | ? | ? | ? | 1 | 0 | 0 | 0 |
| ? | 3 | 0 |   |   |   |   |   |   |   |   |   |

†*Cratoamia gondwanica*

|   |   |   |   |   |   |   |   |   |   |   |   |
|---|---|---|---|---|---|---|---|---|---|---|---|
| 3 | 0 | 0 | 1 | - | - | - | - | - | 0 | - | - |
| ? | ? | ? | ? | ? | ? | ? | ? | ? | ? | ? | ? |
| ? | ? | ? | ? | ? | ? | ? | 1 | 0 | ? | ? | 1 |
| 1 | ? | ? | ? | ? | ? | ? | ? | ? | ? | 1 | 0 |
| ? | 1 | ? | ? | ? | ? | ? | ? | ? | 1 | 0 | ? |
| ? | ? | ? | 0 | 0 | ? | ? | ? | ? | ? | ? | ? |
| ? | ? | ? | ? | ? | ? | ? | ? | ? | 1 | 1 | 0 |
| ? | ? | ? | ? | ? | 0 | 0 | 0 | 1 | 0 | 0 | ? |
| ? | 0 | 0 | 0 | 0 | 0 | 1 | 0 | ? | ? | 1 | 0 |
| ? | ? | 1 | 0 | 0 | 0 | ? | ? | 0 | ? | ? | 0 |
| 0 | 1 | 2 | 0 | 1 | 0 | 2 | 0 | 0 | 0 | - | - |
| - | 0 | 0 | 0 | 0 | 0 | 1 | 1 | ? | 1 | 1 | - |
| - | - | - | - | - | - | 0 | 1 | ? | 0 | 1 | 0 |
| 0 | 2 | 0 | 1 | 1 | 1 | 1 | 0 | 0 | ? | 0 | ? |
| ? | 1 | 2 | 0 | ? | 1 | 0 | 0 | 0 | 0 | 0 | 0 |
| 0 | 0 | 0 | 4 | 0 | 0 | 2 | 0 | 0 | - | 0 | 0 |
| - | 0 | 0 | 0 | 0 | 0 | 2 | ? | ? | ? | ? | 1 |
| ? | ? | 1 | 1 | ? | ? | 1 | ? | ? | ? | ? | ? |
| ? | ? | ? | 0 | ? | 0 | ? | 0 | 2 | 0 | 0 | 1 |
| 2 | - | ? | 0 | 0 | 0 | ? | ? | ? | ? | ? | ? |
| ? | ? | 0 | 0 | 0 | 0 | 0 | 0 | 0 | 1 | 1 | ? |
| ? | ? | 0 | 0 | 0 | 0 | 0 | 0 | 1 | ? | 2 | 2 |
| 1 | 3 | 1 | 0 | 0 | 0 | 0 | 0 | 0 | - | - | - |
| - | 1 | 1 | 0 | 0 | 3 | ? | ? | 3 | 0 | 0 | 0 |
| 0 | 2 | 1 | 0 | - | 1 | 0 | 2 | ? | 2 | - | 1 |
| 1 | ? | ? | ? | ? | 0 | ? | ? | ? | ? | ? | ? |
| ? | 0 | ? | - | ? | ? | 1 | 0 | ? | ? | ? | 0 |
| ? | ? | 1 | - | 0 | ? | ? | ? | ? | ? | ? | ? |
| ? | ? | ? |   |   |   |   |   |   |   |   |   |

†*Cuneatus cuneatus*

|   |   |   |   |   |   |   |   |   |   |   |   |
|---|---|---|---|---|---|---|---|---|---|---|---|
| 4 | 0 | 0 | 0 | - | 0 | 0 | ? | ? | 0 | 0 | - |
| ? | ? | ? | ? | 0 | ? | ? | 0 | ? | ? | ? | 2 |
| 1 | ? | ? | 1 | 0 | ? | ? | 1 | 1 | - | - | 1 |

|                          |   |   |   |   |   |   |   |   |   |   |   |
|--------------------------|---|---|---|---|---|---|---|---|---|---|---|
| 1                        | ? | ? | ? | ? | ? | 1 | ? | ? | 1 | 1 | 0 |
| 2                        | 2 | 1 | 1 | - | - | 1 | 0 | - | 1 | 0 | 1 |
| -                        | 4 | 0 | 1 | 1 | ? | 1 | 3 | 3 | 0 | 0 | 1 |
| -                        | ? | 0 | ? | 1 | 1 | 0 | 0 | 1 | ? | 0 | 3 |
| ?                        | ? | ? | ? | ? | ? | 1 | 0 | 0 | 4 | 0 | ? |
| ?                        | 0 | 0 | 3 | 0 | 1 | 0 | 1 | 0 | 4 | 1 | 0 |
| 0                        | 1 | 1 | 1 | 0 | 1 | 2 | 0 | 1 | 1 | 4 | 0 |
| ?                        | 0 | 2 | 0 | 3 | 1 | 2 | 0 | 0 | 1 | 1 | 0 |
| 1                        | 1 | 0 | ? | ? | ? | 0 | 1 | ? | 1 | 0 | 3 |
| 0                        | 2 | 0 | 0 | 0 | 0 | 0 | 1 | 2 | 1 | - | - |
| -                        | - | - | - | - | - | ? | ? | ? | 0 | 0 | 1 |
| 2                        | 1 | ? | 0 | 0 | 1 | 1 | ? | ? | ? | 2 | ? |
| 0                        | 0 | 0 | 0 | 0 | ? | 3 | 0 | 0 | 1 | 0 | 0 |
| -                        | 1 | ? | 0 | 0 | 1 | 0 | 1 | ? | 2 | 0 | 0 |
| -                        | 0 | 4 | 0 | - | ? | ? | ? | ? | ? | ? | ? |
| ?                        | ? | ? | - | ? | 1 | 0 | 1 | 2 | 0 | 0 | 0 |
| ?                        | - | ? | ? | ? | 1 | ? | ? | ? | ? | ? | ? |
| ?                        | ? | ? | ? | ? | ? | ? | ? | ? | ? | ? | ? |
| ?                        | ? | ? | ? | ? | ? | ? | ? | ? | ? | ? | ? |
| ?                        | ? | ? | ? | ? | ? | ? | ? | ? | ? | ? | ? |
| ?                        | 1 | ? | ? | ? | 3 | 2 | 3 | ? | 1 | 0 | 0 |
| 0                        | 0 | 0 | 0 | 2 | 0 | 0 | - | ? | 0 | 0 | ? |
| 0                        | ? | ? | ? | 0 | 0 | ? | ? | ? | ? | 1 | 1 |
| 1                        | 1 | 0 | 2 | 2 | ? | 0 | 0 | ? | ? | ? | ? |
| ?                        | ? | 1 | - | 0 | 0 | ? | ? | 0 | 0 | 0 | ? |
| 0                        | 0 | 0 |   |   |   |   |   |   |   |   |   |
| † <i>Cuneatus wileyi</i> |   |   |   |   |   |   |   |   |   |   |   |
| 4                        | 0 | 0 | 0 | - | 0 | ? | ? | ? | 0 | 0 | - |
| ?                        | ? | ? | ? | 0 | ? | ? | 0 | ? | ? | ? | 2 |
| 1                        | ? | ? | 1 | 0 | ? | ? | 1 | 1 | - | - | 1 |
| ?                        | ? | ? | ? | 1 | ? | ? | ? | ? | 1 | 1 | 0 |
| 2                        | 2 | 1 | 1 | - | - | 1 | 0 | - | 1 | 0 | 1 |
| -                        | ? | 0 | 1 | 1 | ? | ? | ? | 3 | 0 | 0 | 1 |
| -                        | ? | 0 | ? | 1 | 1 | 0 | 0 | 1 | ? | 0 | 3 |
| ?                        | ? | ? | ? | ? | 1 | 0 | 0 | 4 | 0 | 0 | ? |
| ?                        | 0 | 0 | 3 | 0 | 1 | 0 | 1 | 0 | 4 | 1 | 0 |
| ?                        | 1 | 1 | 1 | 0 | 1 | 2 | 0 | 1 | 1 | 4 | 0 |
| ?                        | 0 | 2 | 0 | 3 | 1 | 2 | 0 | 0 | 1 | 1 | 0 |
| 1                        | 1 | 0 | ? | ? | ? | 0 | 1 | 0 | 1 | 0 | 3 |
| 0                        | 2 | 0 | 0 | 0 | 0 | 0 | 1 | 2 | 1 | - | - |
| -                        | - | - | - | - | - | ? | ? | ? | 0 | 0 | 1 |
| 2                        | 1 | 1 | 0 | 0 | 1 | 1 | ? | 1 | ? | ? | ? |
| ?                        | ? | ? | ? | ? | ? | ? | 3 | 0 | 0 | 1 | 0 |
| -                        | 1 | ? | ? | ? | ? | ? | ? | ? | 2 | 0 | 0 |
| -                        | 0 | 4 | 0 | - | ? | ? | ? | ? | ? | ? | ? |
| ?                        | ? | ? | - | ? | 1 | 0 | 1 | 2 | 0 | 0 | 0 |
| ?                        | - | ? | ? | ? | 1 | ? | ? | ? | ? | ? | ? |
| ?                        | ? | ? | ? | ? | ? | ? | ? | ? | ? | ? | ? |
| ?                        | ? | ? | ? | ? | ? | ? | ? | ? | ? | ? | ? |
| ?                        | ? | ? | ? | ? | ? | ? | ? | ? | ? | ? | ? |
| ?                        | 1 | ? | ? | ? | 3 | 2 | ? | ? | 1 | 0 | 0 |

|                           |   |   |   |   |   |   |   |   |   |   |   |
|---------------------------|---|---|---|---|---|---|---|---|---|---|---|
| 0                         | 0 | 0 | 0 | ? | 0 | 0 | - | ? | 0 | ? | ? |
| 0                         | ? | ? | ? | 0 | 0 | ? | ? | ? | ? | 1 | 1 |
| 1                         | 0 | 0 | 2 | 2 | ? | 0 | 0 | ? | 0 | 2 | 1 |
| ?                         | ? | 1 | - | 0 | 0 | ? | ? | 0 | 0 | 0 | ? |
| 0                         | 0 | 0 |   |   |   |   |   |   |   |   |   |
| † <i>Cyclurus gurleyi</i> |   |   |   |   |   |   |   |   |   |   |   |
| 3                         | 0 | 0 | 1 | - | - | - | - | - | 0 | - | - |
| ?                         | ? | ? | ? | 0 | ? | ? | ? | ? | ? | ? | ? |
| 1                         | 1 | 0 | ? | 0 | ? | ? | 1 | 0 | 1 | 1 | 1 |
| 1                         | 1 | ? | ? | 0 | 0 | ? | ? | ? | 0 | 1 | 0 |
| 1                         | 2 | 0 | 0 | 0 | ? | - | 1 | 2 | 1 | 0 | ? |
| 0                         | 0 | 1 | 0 | 0 | 0 | 0 | ? | 0 | 1 | - | - |
| 0                         | ? | ? | ? | ? | ? | ? | ? | ? | 2 | 1 | 0 |
| 2                         | ? | ? | ? | ? | 0 | 0 | 0 | ? | 1 | 0 | 1 |
| 0                         | 0 | 1 | 1 | 0 | 0 | 1 | 0 | 0 | 0 | 0 | 0 |
| 2                         | 1 | 1 | 0 | 1 | - | - | - | - | - | 1 | 0 |
| 0                         | 1 | 3 | 0 | 2 | 0 | 2 | 0 | 1 | 0 | - | - |
| -                         | 0 | 0 | 2 | 1 | 0 | 0 | 1 | 4 | 1 | 1 | - |
| -                         | - | - | - | - | - | 0 | 1 | ? | 0 | 1 | 1 |
| 1                         | 1 | 0 | 0 | 1 | 3 | 1 | 0 | 0 | 0 | 0 | 1 |
| 0                         | 1 | ? | 0 | 0 | 1 | 0 | 0 | 0 | 0 | 0 | 0 |
| 0                         | 0 | 0 | 0 | 2 | 2 | 2 | 0 | 0 | - | 0 | 0 |
| -                         | 0 | 0 | 0 | 0 | 0 | 2 | 1 | 1 | 1 | 1 | 1 |
| 0                         | 1 | 2 | 1 | 1 | ? | ? | ? | ? | ? | ? | ? |
| 0                         | ? | 0 | 0 | ? | ? | 0 | 0 | 2 | 0 | 0 | 1 |
| 2                         | - | 2 | 0 | 0 | 0 | 0 | 1 | 1 | 1 | 0 | 0 |
| 0                         | - | 0 | 0 | 0 | 0 | 0 | 0 | 0 | 0 | 0 | 0 |
| 0                         | 0 | 0 | 0 | 0 | 0 | 1 | 0 | 0 | ? | 3 | 3 |
| 1                         | 3 | 1 | 0 | 0 | 1 | 0 | 0 | 0 | - | - | - |
| -                         | 1 | 1 | 0 | 0 | 3 | 2 | ? | 3 | 0 | 0 | 0 |
| 0                         | 2 | 1 | 0 | - | 2 | 0 | 2 | ? | 2 | - | 1 |
| 3                         | 2 | 0 | 1 | 1 | 0 | 2 | 2 | 1 | 1 | 1 | 3 |
| 3                         | 0 | 1 | - | 0 | 0 | 0 | 0 | 0 | 1 | 1 | 0 |
| 1                         | 1 | ? | ? | 1 | ? | 0 | ? | ? | ? | 0 | 0 |
| ?                         | 0 | 0 |   |   |   |   |   |   |   |   |   |
| † <i>Cyclurus kehleri</i> |   |   |   |   |   |   |   |   |   |   |   |
| 3                         | 0 | 0 | 1 | - | - | - | - | - | 0 | - | - |
| ?                         | ? | ? | ? | 0 | ? | ? | ? | ? | ? | 2 | 1 |
| 1                         | ? | ? | 0 | 0 | ? | ? | 2 | 0 | 1 | 1 | 1 |
| 1                         | 1 | 0 | ? | 1 | 0 | ? | 1 | ? | 0 | 1 | 0 |
| 1                         | 2 | 0 | 0 | 0 | 0 | - | 1 | 2 | 1 | 0 | 0 |
| 0                         | 0 | 1 | 0 | 0 | 0 | 0 | 1 | 0 | 1 | - | - |
| 0                         | 1 | 0 | ? | ? | ? | 0 | 0 | 2 | 1 | 1 | 0 |
| 2                         | 0 | 0 | 0 | 2 | 0 | 0 | 0 | 1 | 1 | 0 | 1 |
| 0                         | 0 | 1 | 0 | 0 | 0 | 1 | 0 | 0 | 0 | 0 | 0 |
| 2                         | 1 | 1 | 0 | 1 | - | - | - | - | - | 1 | 0 |
| 0                         | 1 | 3 | 0 | 2 | 0 | 2 | 0 | 1 | 0 | - | - |
| -                         | 0 | 0 | 2 | 1 | 0 | 0 | 1 | 4 | 1 | 1 | - |
| -                         | - | - | - | - | - | 0 | 1 | ? | 0 | 1 | 1 |
| 1                         | 1 | 0 | 0 | 1 | 3 | 1 | 0 | 0 | 0 | 0 | 1 |
| 0                         | 1 | 2 | 0 | 0 | 1 | 0 | 0 | 0 | 0 | 2 | 0 |

|   |   |   |   |   |   |   |   |   |   |   |   |
|---|---|---|---|---|---|---|---|---|---|---|---|
| 0 | 0 | 0 | 0 | 2 | 2 | 2 | 0 | 0 | - | 0 | 0 |
| - | 0 | 0 | 0 | 0 | 0 | 2 | 1 | 1 | 1 | 1 | 1 |
| 0 | 1 | 2 | 1 | 0 | ? | ? | ? | ? | ? | ? | 1 |
| 0 | ? | 0 | 0 | 1 | 0 | 0 | 0 | 2 | 0 | 0 | 1 |
| 2 | - | 2 | 0 | 0 | 0 | 0 | 1 | 1 | ? | 0 | 0 |
| 0 | - | 0 | 0 | 0 | 0 | 0 | 0 | 0 | 0 | 1 | 0 |
| 0 | 0 | 0 | 0 | 0 | 0 | 1 | 0 | 0 | ? | 3 | 4 |
| 1 | 3 | 1 | 0 | 0 | 1 | 0 | 0 | 0 | - | - | - |
| - | 1 | 1 | 0 | 0 | 3 | 2 | ? | 2 | 0 | 0 | 0 |
| 0 | 2 | 1 | 0 | - | 2 | 0 | 2 | ? | 2 | - | 1 |
| 2 | 2 | 0 | 1 | 1 | 0 | 2 | 2 | 0 | 1 | 1 | 3 |
| 3 | 0 | 1 | ? | 0 | 0 | 0 | 0 | 0 | 1 | 1 | 0 |
| 1 | 1 | ? | ? | 1 | ? | 0 | ? | 0 | 1 | 0 | 0 |
| 1 | 0 | 0 |   |   |   |   |   |   |   |   |   |

†*Dapedium caelatum*

|   |   |   |   |   |   |   |   |   |   |   |   |
|---|---|---|---|---|---|---|---|---|---|---|---|
| 5 | 0 | 0 | 0 | - | 0 | 0 | 0 | - | 0 | 0 | - |
| ? | ? | ? | ? | 0 | ? | ? | ? | ? | ? | ? | ? |
| - | - | - | - | ? | ? | ? | ? | ? | ? | ? | - |
| - | - | - | 1 | ? | ? | ? | ? | - | 0 | ? | ? |
| ? | 2 | ? | ? | ? | ? | ? | 0 | - | 1 | 0 | ? |
| ? | ? | ? | 0 | 0 | ? | ? | ? | 2 | ? | ? | ? |
| ? | ? | ? | ? | ? | ? | ? | ? | ? | ? | 0 | 4 |
| ? | ? | ? | ? | ? | 2 | 0 | 0 | 3 | 0 | 0 | ? |
| ? | 0 | ? | 0 | 0 | 0 | 0 | 0 | ? | 0 | 0 | 0 |
| ? | 0 | ? | 0 | 0 | 0 | 3 | - | 1 | 0 | ? | ? |
| ? | ? | ? | ? | ? | ? | 0 | 0 | 0 | ? | ? | ? |
| - | ? | 0 | 1 | 0 | ? | ? | 1 | 1 | 1 | 0 | 3 |
| ? | 0 | 0 | 0 | ? | ? | 0 | ? | ? | ? | 0 | 1 |
| 2 | 1 | 0 | 0 | 0 | 1 | ? | ? | ? | ? | 1 | ? |
| ? | 1 | 1 | 0 | 0 | 0 | - | 0 | 0 | 0 | 0 | 1 |
| 0 | 0 | 1 | 2 | 0 | ? | 3 | 0 | 0 | ? | 0 | ? |
| ? | 1 | ? | 0 | 0 | 0 | 0 | ? | ? | ? | ? | 1 |
| 0 | 0 | ? | 1 | 0 | ? | ? | ? | ? | ? | ? | ? |
| 0 | ? | 0 | 0 | ? | ? | 0 | ? | ? | ? | ? | ? |
| ? | ? | ? | ? | ? | ? | ? | ? | ? | ? | ? | ? |
| ? | ? | ? | ? | ? | ? | ? | ? | ? | ? | ? | ? |
| ? | ? | ? | ? | ? | ? | ? | ? | ? | ? | ? | ? |
| ? | ? | ? | ? | ? | ? | ? | ? | ? | ? | ? | ? |
| ? | ? | ? | ? | ? | ? | ? | ? | ? | ? | ? | ? |
| ? | 1 | ? | ? | ? | 1 | ? | 0 | ? | ? | ? | ? |
| 0 | 1 | 0 | 0 | ? | 0 | 0 | - | ? | 0 | 0 | ? |
| 1 | ? | ? | ? | ? | 1 | 2 | ? | ? | ? | 1 | ? |
| ? | ? | 0 | ? | 1 | 1 | 0 | ? | 1 | ? | ? | ? |
| ? | ? | ? | ? | ? | ? | ? | ? | ? | ? | 0 | ? |
| 0 | 0 | 0 |   |   |   |   |   |   |   |   |   |

†*Dapedium pholidotum*

|   |   |   |   |   |   |   |   |   |   |   |   |
|---|---|---|---|---|---|---|---|---|---|---|---|
| 5 | 0 | 0 | 0 | - | 0 | 0 | 0 | - | 0 | 0 | - |
| ? | ? | ? | ? | 0 | ? | ? | ? | ? | ? | ? | ? |
| ? | ? | ? | ? | ? | ? | ? | ? | ? | ? | ? | ? |
| ? | ? | ? | ? | ? | ? | ? | ? | ? | ? | ? | ? |
| ? | ? | ? | ? | ? | ? | ? | ? | ? | ? | ? | ? |
| ? | ? | ? | 0 | 0 | ? | ? | ? | 2 | ? | ? | ? |



|   |   |   |   |   |   |   |   |   |   |   |   |
|---|---|---|---|---|---|---|---|---|---|---|---|
| ? | ? | ? | ? | ? | ? | ? | ? | ? | ? | 0 | ? |
| ? | ? | ? | ? | ? | 2 | 0 | 0 | - | - | - | ? |
| ? | ? | ? | ? | ? | ? | ? | ? | ? | 0 | 0 | 0 |
| 0 | 0 | ? | ? | 0 | 0 | 3 | - | ? | 0 | 4 | 0 |
| ? | 0 | ? | ? | 1 | 0 | 2 | 0 | ? | 0 | - | ? |
| - | 0 | 0 | 1 | 0 | ? | ? | 1 | 1 | 1 | 0 | 3 |
| 1 | 0 | 0 | 0 | 0 | 0 | 0 | ? | ? | ? | 1 | 1 |
| 2 | 1 | 2 | 0 | 0 | 1 | ? | ? | ? | 1 | 0 | 1 |
| 0 | 1 | 1 | 0 | ? | 0 | - | 0 | 0 | 0 | 0 | 1 |
| 0 | 0 | 1 | 2 | ? | ? | 3 | 0 | 0 | ? | 0 | ? |
| ? | 1 | ? | 0 | 0 | 0 | 0 | ? | ? | ? | 0 | 1 |
| 0 | 0 | 3 | 1 | 0 | ? | ? | ? | ? | ? | ? | ? |
| ? | ? | 0 | 0 | ? | ? | 0 | ? | ? | ? | ? | ? |
| ? | ? | ? | ? | ? | ? | ? | ? | ? | ? | ? | ? |
| ? | ? | ? | ? | ? | ? | ? | ? | ? | ? | ? | ? |
| ? | ? | ? | ? | ? | ? | ? | ? | ? | ? | ? | ? |
| ? | ? | ? | ? | ? | ? | ? | ? | ? | ? | ? | ? |
| ? | 1 | ? | ? | ? | 1 | 3 | 0 | ? | 2 | ? | ? |
| 0 | 1 | 0 | 0 | ? | 0 | 0 | - | - | 0 | 0 | ? |
| 1 | ? | ? | ? | ? | 1 | 2 | ? | ? | ? | 1 | ? |
| ? | ? | 0 | ? | ? | ? | 0 | 1 | ? | ? | 1 | ? |
| ? | ? | ? | ? | ? | ? | ? | ? | ? | 0 | 0 | ? |
| ? | 0 | 0 |   |   |   |   |   |   |   |   |   |

†*Dapedium stollorum*

|   |   |   |   |   |   |   |   |   |   |   |   |
|---|---|---|---|---|---|---|---|---|---|---|---|
| 5 | 0 | 0 | 0 | - | 1 | 0 | 0 | - | 0 | 0 | - |
| ? | ? | ? | ? | 0 | ? | ? | ? | ? | ? | ? | ? |
| ? | ? | ? | ? | ? | ? | ? | ? | ? | ? | ? | ? |
| ? | ? | ? | ? | ? | ? | ? | ? | ? | ? | 1 | 0 |
| ? | ? | ? | ? | ? | ? | ? | ? | ? | ? | ? | ? |
| ? | ? | ? | 0 | 0 | ? | ? | ? | ? | 3 | ? | ? |
| ? | ? | ? | ? | ? | ? | ? | ? | ? | ? | 0 | ? |
| ? | ? | ? | ? | ? | 2 | 0 | 0 | 4 | 0 | 0 | ? |
| ? | 0 | 1 | 0 | 0 | 0 | 0 | 0 | ? | 0 | 0 | 0 |
| 0 | 0 | ? | 0 | 0 | 0 | 3 | - | 1 | 0 | 4 | 0 |
| ? | 0 | 2 | 2 | 0 | 0 | 2 | 0 | 0 | 0 | - | - |
| - | 0 | 0 | 1 | 0 | 0 | 1 | 1 | ? | 1 | 0 | 3 |
| 1 | 0 | 0 | 0 | 0 | 0 | 0 | 0 | 0 | 0 | 1 | 1 |
| 2 | 1 | 2 | 0 | 0 | 1 | 1 | 0 | 0 | ? | 0 | ? |
| ? | ? | ? | 0 | ? | ? | ? | ? | 0 | 0 | 0 | 1 |
| 0 | 0 | 1 | 2 | ? | ? | 3 | 0 | 0 | ? | 0 | ? |
| ? | 1 | ? | 0 | 0 | 0 | 0 | 1 | 1 | 1 | 0 | 1 |
| 0 | 0 | 3 | 1 | 0 | ? | ? | ? | ? | ? | ? | 0 |
| 0 | 0 | 0 | 0 | ? | 0 | 0 | ? | ? | ? | ? | ? |
| ? | ? | ? | ? | ? | ? | ? | ? | ? | ? | ? | ? |
| ? | ? | ? | ? | ? | ? | ? | ? | ? | ? | ? | ? |
| ? | ? | ? | ? | ? | ? | ? | ? | ? | ? | ? | ? |
| ? | ? | ? | ? | ? | ? | ? | ? | ? | ? | ? | ? |
| ? | 1 | ? | ? | ? | 1 | 0 | 0 | ? | 2 | ? | ? |
| 0 | 2 | 0 | 0 | 0 | 0 | 0 | - | - | 0 | 0 | ? |
| 1 | 2 | ? | ? | ? | 0 | 2 | ? | ? | ? | 1 | ? |
| ? | ? | 0 | ? | 1 | 1 | 0 | 1 | 1 | ? | ? | ? |

|                                  |   |   |   |     |   |   |   |   |   |   |     |
|----------------------------------|---|---|---|-----|---|---|---|---|---|---|-----|
| ?                                | ? | ? | ? | ?   | ? | ? | ? | ? | 0 | 0 | ?   |
| 0                                | 0 | 0 |   |     |   |   |   |   |   |   |     |
| † <i>Dentilepisosteus laevis</i> |   |   |   |     |   |   |   |   |   |   |     |
| 1                                | 1 | 2 | 0 | -   | 1 | 1 | 1 | 1 | 0 | 0 | -   |
| ?                                | ? | ? | ? | 0   | ? | ? | 0 | 1 | 0 | ? | 2   |
| 1                                | 0 | - | 2 | 0   | 0 | - | 1 | 0 | 0 | - | 1   |
| 1                                | 0 | ? | 1 | -   | 1 | 1 | ? | ? | 1 | 1 | 0   |
| 1                                | 2 | 1 | 1 | -   | - | 1 | 1 | 1 | 1 | 0 | ?   |
| ?                                | 3 | 0 | 1 | 0   | ? | 1 | 0 | 4 | 0 | 0 | 1   |
| -                                | 0 | 0 | ? | 1   | 1 | 0 | 0 | 1 | ? | 0 | 3   |
| ?                                | 0 | 0 | 0 | 2   | 2 | 0 | 0 | 4 | 0 | 0 | 1   |
| ?                                | 0 | 0 | 0 | 1   | 1 | 0 | 1 | 0 | ? | ? | ?   |
| ?                                | 1 | 1 | 0 | 0   | 1 | 1 | 0 | 0 | 1 | 3 | 1   |
| 0                                | 0 | 1 | 1 | 4   | 1 | 2 | 0 | 0 | 1 | 4 | ?   |
| 1                                | 0 | ? | ? | ?   | ? | 0 | 1 | ? | 1 | 0 | ?   |
| 0                                | ? | 0 | 0 | 0   | 0 | 0 | 1 | 2 | 0 | 1 | 2   |
| 4                                | 1 | 2 | 0 | 0   | 1 | ? | ? | ? | 0 | 0 | 1   |
| 0                                | 1 | 1 | 0 | ?   | 1 | ? | ? | 0 | 0 | 0 | 0   |
| 0                                | 0 | 1 | 0 | ?   | 0 | 3 | 0 | 1 | 1 | 0 | 0   |
| -                                | 0 | 0 | 0 | 0   | 1 | 3 | 1 | 1 | 2 | 0 | 1   |
| 1                                | 0 | 4 | 0 | -   | ? | ? | ? | ? | ? | ? | ?   |
| 0                                | ? | ? | 0 | ?   | ? | 0 | 1 | 2 | 0 | 0 | 0   |
| 0                                | - | 2 | ? | ?   | 1 | 0 | ? | 0 | ? | ? | 0   |
| 0                                | ? | 1 | 0 | 0   | 0 | 0 | 0 | 0 | 0 | 0 | 0   |
| 0                                | 0 | 1 | 0 | 0&1 | - | ? | ? | ? | ? | 1 | 1   |
| 1                                | 1 | 0 | 2 | 0   | - | 0 | 0 | 0 | - | - | -   |
| -                                | ? | 1 | 0 | ?   | 3 | 2 | 3 | 3 | 1 | 0 | 0   |
| ?                                | 0 | 0 | 0 | 2   | 0 | 0 | ? | ? | 0 | 0 | ?   |
| 0                                | ? | ? | ? | ?   | 0 | ? | ? | ? | ? | 1 | ?   |
| ?                                | 2 | 0 | 2 | 2   | 0 | 0 | 0 | 0 | ? | 2 | ?   |
| ?                                | ? | ? | ? | 0   | ? | ? | ? | ? | 0 | 0 | ?   |
| 0                                | 0 | 0 |   |     |   |   |   |   |   |   |     |
| † <i>Diplomystus dentatus</i>    |   |   |   |     |   |   |   |   |   |   |     |
| 0                                | 0 | 1 | 2 | 0   | - | - | - | - | ? | - | -   |
| 1                                | ? | ? | ? | 1   | 0 | - | 0 | 0 | - | 3 | 2   |
| 0                                | ? | ? | 0 | 1   | 1 | 1 | 2 | 0 | ? | ? | 1   |
| 0                                | ? | 5 | 1 | 0   | 0 | ? | 0 | 1 | 0 | ? | ?   |
| ?                                | 1 | 1 | ? | ?   | ? | 0 | 1 | 3 | 1 | 1 | 0   |
| ?                                | ? | ? | 0 | 0   | 0 | 0 | 0 | 1 | 0 | 1 | -   |
| 1                                | 0 | 1 | ? | ?   | ? | ? | ? | 4 | 1 | 0 | 2   |
| 0                                | 0 | 0 | 0 | 3   | 0 | 1 | 0 | ? | 1 | ? | ?   |
| 0                                | 0 | ? | 2 | ?   | 1 | 0 | 0 | 0 | 2 | 2 | ?   |
| ?                                | 1 | 0 | 0 | 0   | 0 | 3 | - | 0 | 0 | 0 | 0   |
| 0                                | 0 | 0 | 1 | 6   | 0 | 2 | 0 | 0 | 0 | - | -   |
| -                                | 0 | 0 | 6 | 0   | 1 | 1 | 4 | - | 1 | 1 | -   |
| -                                | - | - | - | -   | - | 0 | - | - | 0 | 1 | 0   |
| 2                                | 1 | 1 | 0 | 0   | 2 | 2 | - | 0 | 1 | 0 | 1   |
| 1                                | 0 | 3 | 1 | 1   | 1 | 0 | 1 | 0 | 0 | 0 | 0   |
| 0                                | 0 | 1 | 0 | -   | ? | 3 | 0 | 0 | 0 | 0 | ?   |
| ?                                | 0 | ? | 0 | 0   | 2 | 4 | 1 | 2 | 1 | 1 | 1   |
| 0                                | 0 | 2 | 0 | -   | 2 | ? | ? | ? | 1 | ? | 0&1 |

|   |   |   |   |   |   |   |   |   |   |   |   |
|---|---|---|---|---|---|---|---|---|---|---|---|
| 1 | 1 | 0 | 0 | 0 | 0 | 0 | 0 | 1 | 1 | 1 | 0 |
| - | 1 | 0 | 0 | 0 | 1 | 0 | ? | 1 | 1 | 1 | 1 |
| 1 | 1 | ? | 0 | 0 | 0 | 0 | 0 | 0 | 0 | 0 | 0 |
| ? | 0 | 0 | 1 | 1 | 1 | 2 | 1 | 0 | 0 | 3 | 4 |
| 1 | 1 | 0 | 2 | 0 | 2 | 1 | 0 | 1 | 2 | 0 | 2 |
| 2 | 0 | 0 | 0 | 1 | 2 | 3 | ? | 2 | 2 | 1 | 0 |
| 0 | 0 | 1 | 0 | - | 2 | 0 | 2 | 2 | 2 | - | 1 |
| 0 | 0 | 0 | 0 | 1 | 2 | 0 | 2 | 0 | 1 | 1 | 3 |
| ? | 0 | 1 | - | 0 | ? | 1 | 0 | ? | 1 | 2 | 0 |
| 0 | 2 | 1 | - | 0 | 0 | 1 | 1 | 0 | 1 | 0 | ? |
| 1 | 0 | 0 |   |   |   |   |   |   |   |   |   |

†*Dorsetichthys bechei*

|   |   |   |   |   |   |   |   |   |   |   |   |
|---|---|---|---|---|---|---|---|---|---|---|---|
| ? | 0 | 1 | 0 | - | ? | 0 | 0 | - | ? | 0 | - |
| 1 | 2 | 4 | 0 | 1 | 0 | - | 0 | 0 | - | 1 | 1 |
| 0 | 1 | 1 | 0 | 0 | 1 | 1 | 0 | 0 | 1 | 1 | 0 |
| 0 | 0 | 3 | 1 | 0 | 0 | 0 | 0 | 1 | ? | 1 | 1 |
| 1 | 1 | 1 | 0 | 2 | 1 | 0 | 1 | ? | 1 | 1 | 0 |
| ? | ? | ? | 0 | 0 | ? | ? | ? | 1 | 0 | 1 | - |
| ? | 0 | 1 | ? | ? | ? | ? | ? | ? | 1 | 0 | ? |
| ? | 0 | ? | 0 | ? | 0 | 0 | 0 | 0 | 0 | 1 | 1 |
| 1 | 0 | 0 | 2 | 0 | 1 | 0 | 0 | 0 | 0 | 2 | 1 |
| ? | 0 | 0 | 0 | 0 | 0 | ? | 0 | 0 | 0 | 3 | 0 |
| 0 | 0 | 1 | 1 | 1 | 1 | 2 | 0 | 0 | 0 | - | - |
| - | 0 | 0 | 0 | 0 | 0 | 1 | 1 | 3 | 1 | 0 | 0 |
| 0 | - | 1 | 0 | - | 0 | ? | 0 | - | 0 | 1 | 0 |
| 1 | 1 | 1 | 0 | 0 | 2 | 2 | - | 0 | 1 | 0 | 1 |
| 3 | 1 | 1 | 0 | 1 | 0 | - | 1 | 0 | 0 | ? | 0 |
| 0 | 0 | 1 | 0 | - | ? | 3 | 0 | 0 | 0 | 1 | 1 |
| 0 | 0 | 1 | 1 | 0 | 2 | 4 | 1 | 1 | 0 | 0 | 1 |
| 0 | 0 | 2 | 1 | 2 | ? | ? | ? | ? | 0 | - | 0 |
| 0 | 0 | 0 | 0 | 2 | 0 | ? | - | 0 | 1 | 0 | 1 |
| - | - | 0 | 0 | 0 | - | 0 | 1 | 1 | ? | ? | 1 |
| 0 | - | - | 0 | 0 | 0 | 1 | 1 | 1 | 0 | 1 | 0 |
| 0 | 0 | 1 | - | - | - | 0 | 0 | 0 | 0 | 0 | 0 |
| 1 | 3 | 0 | 0 | 0 | 0 | 0 | 0 | 1 | 1 | ? | 3 |
| 3 | 0 | 0 | 0 | 1 | 1 | 2 | 0 | 3 | 0 | 1 | 1 |
| 1 | 2 | 0 | 0 | ? | 0 | 0 | 1 | 1 | 0 | 0 | 1 |
| 0 | ? | ? | ? | ? | 0 | ? | ? | ? | ? | 1 | 0 |
| ? | ? | 0 | 2 | 0 | 0 | 0 | 0 | ? | ? | ? | ? |
| ? | ? | 1 | - | 0 | 0 | ? | ? | 0 | 0 | 0 | ? |
| 0 | 0 | 0 |   |   |   |   |   |   |   |   |   |

†*Ebertichthys ettlingsensis*

|   |   |   |   |   |   |   |   |   |   |   |   |
|---|---|---|---|---|---|---|---|---|---|---|---|
| 0 | 0 | 1 | 2 | ? | - | - | - | - | ? | - | - |
| ? | ? | ? | ? | 1 | 0 | - | ? | ? | ? | ? | ? |
| ? | ? | ? | ? | ? | ? | ? | ? | ? | ? | ? | ? |
| 0 | ? | 4 | 1 | 0 | 0 | ? | 0 | 1 | 0 | 1 | 2 |
| ? | ? | ? | 0 | 0 | ? | ? | 1 | 1 | 1 | 1 | 0 |
| 0 | 1 | 1 | 0 | 0 | 0 | 0 | 0 | 1 | 0 | 1 | - |
| 1 | 0 | 1 | ? | ? | ? | 1 | ? | 4 | 1 | 0 | 2 |
| 0 | ? | 0 | 0 | ? | 0 | 0 | 0 | ? | ? | ? | ? |
| 0 | 0 | 0 | ? | 1 | 1 | 0 | 0 | 0 | 2 | 2 | 1 |

|   |   |   |   |   |   |   |   |     |   |   |   |
|---|---|---|---|---|---|---|---|-----|---|---|---|
| ? | 1 | 0 | 0 | 0 | 0 | 3 | - | 0   | 0 | ? | 0 |
| 0 | 0 | 1 | 1 | 0 | 1 | 2 | 0 | 0   | 0 | - | - |
| - | 0 | 0 | 0 | 0 | 1 | 1 | 4 | -   | 1 | 1 | - |
| - | - | - | - | - | - | 0 | - | -   | 0 | 1 | 0 |
| 2 | 1 | 1 | 0 | 0 | 2 | 2 | - | 0   | ? | 0 | 1 |
| 4 | 0 | 3 | 1 | 1 | 4 | ? | 1 | 0   | ? | 0 | 0 |
| 0 | ? | ? | 0 | - | ? | 3 | 0 | 0   | 0 | 0 | 0 |
| - | 0 | 0 | 0 | 0 | 2 | 4 | 1 | 2   | 1 | 1 | 1 |
| 0 | 0 | 2 | 0 | - | ? | ? | ? | ?   | ? | ? | 1 |
| ? | ? | 0 | 0 | 2 | 0 | 0 | 0 | 1   | 1 | 1 | 0 |
| - | 0 | 0 | ? | 1 | 0 | 0 | 1 | 1   | 1 | 1 | 1 |
| 1 | 1 | 1 | 2 | 2 | 0 | 1 | 0 | 0   | 1 | 1 | 0 |
| 0 | 0 | 0 | 1 | 1 | 1 | 2 | 1 | 0   | 0 | 2 | 2 |
| 1 | 1 | 0 | 0 | 1 | 3 | 0 | 0 | 1   | 2 | 0 | 1 |
| 1 | 0 | 0 | 1 | 0 | 2 | 3 | ? | 4   | 2 | 0 | 1 |
| 1 | 2 | 1 | 0 | - | 2 | 1 | 1 | 1   | 1 | 1 | 1 |
| 0 | 0 | 1 | 1 | 1 | 0 | 0 | 1 | 0&1 | 1 | 1 | 3 |
| 3 | 0 | 1 | 2 | 0 | 0 | 0 | 0 | 0   | 1 | 3 | 1 |
| 0 | 3 | 1 | - | 0 | 0 | 1 | 1 | 0   | 1 | ? | 2 |
| 1 | 0 | ? |   |   |   |   |   |     |   |   |   |

*Elops saurus*

|   |   |   |   |   |     |   |   |   |   |   |   |
|---|---|---|---|---|-----|---|---|---|---|---|---|
| 0 | 0 | 1 | 2 | 1 | -   | - | - | - | 0 | - | - |
| 1 | 2 | 3 | 1 | 1 | 0   | - | 0 | 0 | - | 3 | 2 |
| 0 | 0 | - | 0 | 1 | 1   | 1 | 2 | 0 | 1 | 1 | 1 |
| 0 | 0 | 5 | 1 | 0 | 0   | 0 | 0 | 1 | 0 | 1 | 2 |
| 2 | 1 | 0 | 0 | 0 | 1   | - | 1 | 1 | 1 | 1 | 0 |
| 0 | 2 | 0 | 0 | 0 | 0   | 0 | 0 | 1 | 0 | 1 | - |
| 0 | 2 | 1 | 1 | 1 | 0   | 1 | 1 | 1 | 1 | 0 | 2 |
| 0 | 0 | 0 | 1 | 3 | 0   | 0 | 0 | 0 | 1 | 1 | ? |
| 0 | 0 | 0 | 2 | 1 | 1   | 0 | 0 | 0 | 2 | 2 | ? |
| ? | 1 | 0 | 0 | 0 | 1   | 3 | - | 0 | - | 0 | 0 |
| 0 | 0 | 1 | 1 | 1 | 0   | 2 | 0 | 0 | 0 | - | - |
| - | 0 | 0 | 0 | 0 | 0   | 1 | 2 | - | 1 | 1 | - |
| - | - | - | - | - | -   | 0 | - | - | 0 | 1 | 0 |
| 1 | 1 | 1 | 0 | 0 | 2   | 2 | - | 0 | 1 | 0 | 1 |
| ? | 0 | 3 | 1 | 1 | ?   | ? | 1 | 0 | 0 | 0 | 0 |
| 0 | 2 | 0 | 0 | - | 0   | 3 | 0 | 0 | 0 | 1 | ? |
| ? | 0 | ? | 0 | 0 | 1&2 | 4 | 1 | 1 | 1 | 1 | 1 |
| 0 | 0 | 0 | 1 | 2 | 2   | 0 | 2 | 0 | ? | ? | 1 |
| 3 | 0 | 0 | 0 | 1 | 0   | 0 | 0 | 1 | 1 | 1 | 0 |
| - | 1 | ? | 0 | 0 | 0   | 0 | ? | 1 | 0 | 1 | 1 |
| 1 | 1 | ? | 0 | 0 | 0   | 1 | 0 | 0 | 1 | 1 | 1 |
| 1 | 0 | 0 | 1 | 0 | 0   | 2 | 1 | 0 | 1 | 3 | 4 |
| 1 | 1 | 0 | 1 | 1 | 0   | 1 | 0 | 1 | 2 | 0 | 1 |
| 1 | 0 | 0 | 1 | 0 | 2   | 3 | ? | 3 | 2 | 0 | 1 |
| 1 | 2 | 1 | 0 | - | 2   | 1 | 1 | 1 | 2 | - | 1 |
| 1 | 0 | 0 | 1 | ? | 0   | 0 | 1 | 1 | ? | 1 | 3 |
| ? | ? | 1 | - | 0 | 0   | 1 | 0 | 0 | 0 | 0 | 0 |
| 0 | 5 | 1 | - | 0 | 0   | 1 | 1 | 0 | 1 | 1 | 2 |
| 1 | 0 | 1 |   |   |     |   |   |   |   |   |   |

†*Eurycormus speciosus*

|   |   |   |   |   |   |   |   |     |   |   |     |
|---|---|---|---|---|---|---|---|-----|---|---|-----|
| 0 | 0 | 1 | 1 | - | - | - | - | -   | 0 | - | -   |
| ? | ? | ? | ? | 0 | - | - | ? | 0   | - | ? | ?   |
| ? | ? | ? | ? | ? | ? | ? | ? | ?   | ? | ? | ?   |
| ? | ? | ? | ? | 0 | 0 | ? | 0 | 1   | 0 | 1 | 1   |
| ? | 1 | 1 | 0 | 2 | 1 | ? | 0 | ?   | 1 | 1 | ?   |
| ? | 0 | ? | 0 | 0 | ? | 0 | 0 | 2   | 0 | 1 | -   |
| 0 | 0 | 0 | ? | ? | ? | 0 | ? | 0   | 1 | 0 | ?   |
| 0 | 0 | 0 | 0 | 2 | 0 | ? | 0 | ?   | ? | 0 | ?   |
| ? | ? | ? | 2 | 0 | 0 | ? | 0 | 0   | ? | ? | ?   |
| ? | 1 | 0 | 0 | 0 | ? | ? | 0 | 0   | 0 | ? | 0   |
| 0 | 0 | 1 | 1 | 1 | 1 | 2 | 0 | 0   | 0 | - | -   |
| - | 0 | 0 | ? | ? | 0 | 0 | 1 | 2   | 1 | 0 | 2   |
| 0 | 1 | 1 | 0 | - | 0 | 1 | - | -   | 0 | 1 | 0   |
| 1 | 1 | 1 | 0 | 0 | 2 | 2 | - | 0   | 1 | 1 | 1   |
| 0 | 1 | ? | 0 | 0 | ? | ? | ? | 0   | 0 | 0 | 0   |
| 0 | 0 | 1 | 0 | - | ? | 3 | 0 | 0   | 0 | 1 | 1   |
| 0 | 1 | 1 | 0 | 0 | 0 | 4 | 1 | 1   | 0 | 1 | 1   |
| ? | 0 | ? | 1 | 2 | ? | ? | ? | ?   | 1 | 1 | ?   |
| 0 | 0 | 0 | 0 | 2 | 0 | ? | - | 0   | 1 | 0 | 1   |
| - | - | 0 | 0 | 1 | - | 0 | 1 | 1   | 0 | 1 | 1   |
| 0 | - | - | 0 | 0 | 0 | 1 | 0 | 0   | 0 | 0 | 0   |
| 0 | 0 | 1 | - | - | - | 1 | 0 | 0&1 | 0 | ? | 0   |
| 1 | ? | 0 | 0 | 0 | 0 | 0 | 0 | 1   | 0 | 1 | 0&1 |
| 0 | 0 | 0 | 1 | 1 | 2 | 1 | 0 | 3   | 0 | 1 | 0   |
| 1 | 2 | 0 | 0 | - | 1 | 0 | 0 | 0   | 0 | 0 | 1   |
| 0 | 0 | ? | ? | ? | 0 | 0 | ? | ?   | ? | 1 | ?   |
| ? | 0 | 0 | 2 | 0 | 0 | 0 | 0 | 0   | 1 | 2 | 1   |
| 1 | 3 | 0 | 0 | 0 | 0 | 1 | 1 | ?   | 1 | ? | 0   |
| 1 | 3 | 0 |   |   |   |   |   |     |   |   |     |

*Hiodon alosoides*

|   |   |   |   |   |   |   |   |   |   |   |   |
|---|---|---|---|---|---|---|---|---|---|---|---|
| 1 | 0 | 1 | 2 | 0 | - | - | - | - | 0 | - | - |
| ? | ? | ? | 1 | 1 | 1 | 1 | 0 | 1 | 0 | 3 | 2 |
| 0 | 0 | - | 0 | 1 | 1 | 1 | 1 | 0 | 1 | 0 | 1 |
| 0 | 0 | 3 | 1 | 0 | 0 | 0 | 0 | 1 | 0 | 1 | 2 |
| 2 | 1 | 0 | 0 | 0 | 1 | - | 1 | 0 | 1 | 1 | 1 |
| - | 5 | 1 | 0 | 0 | 1 | 0 | 0 | 1 | 0 | 1 | - |
| 0 | 3 | 1 | 1 | 1 | 0 | 1 | 1 | 3 | 1 | 0 | 2 |
| 0 | 0 | 1 | 1 | 2 | 0 | 3 | 0 | ? | 0 | ? | ? |
| 0 | 0 | 1 | 0 | 0 | 0 | 0 | 0 | 0 | 2 | 2 | 0 |
| 3 | 1 | 0 | 0 | 1 | 0 | - | - | - | - | 0 | 0 |
| 0 | 0 | 2 | 0 | 2 | 1 | 2 | 0 | 0 | 0 | - | - |
| - | 0 | 1 | - | - | - | - | 4 | - | 1 | 1 | - |
| - | - | - | - | - | - | 0 | - | - | 0 | 1 | 1 |
| 1 | 2 | 2 | 0 | 0 | 1 | 0 | - | - | 1 | 0 | 1 |
| 1 | 0 | 1 | 1 | 1 | 2 | - | 1 | 0 | 0 | 0 | 0 |
| 0 | 2 | 0 | 0 | - | - | 3 | 0 | 0 | 0 | 1 | 0 |
| - | 0 | 0 | 0 | 0 | 0 | 4 | 0 | - | - | 1 | 1 |
| 0 | 0 | 3 | 0 | - | 2 | 0 | 3 | 1 | 0 | - | 0 |
| 3 | 0 | - | 0 | 1 | 0 | 0 | 0 | 1 | 1 | 1 | 0 |
| - | 1 | - | 0 | 1 | 0 | 1 | 1 | 1 | 1 | 1 | 1 |
| 1 | ? | 0 | 0 | 0 | 0 | 0 | 1 | 1 | 0 | 0 | 0 |

|   |   |   |   |   |   |   |   |   |   |   |   |
|---|---|---|---|---|---|---|---|---|---|---|---|
| 0 | 0 | 0 | 0 | 1 | 0 | 2 | 1 | 0 | 0 | 3 | 4 |
| 1 | 3 | 0 | 1 | 0 | 0 | 1 | 0 | 1 | 2 | 1 | 1 |
| 1 | 0 | 0 | 1 | 0 | 3 | 0 | ? | 3 | 0 | 0 | 0 |
| 1 | 2 | 1 | 1 | - | 2 | 0 | 2 | 2 | 2 | - | 1 |
| 0 | 0 | 0 | 1 | 1 | 1 | 0 | 2 | 1 | 1 | 1 | 3 |
| 3 | 0 | 1 | - | 0 | 0 | 0 | 0 | 0 | 1 | 0 | 0 |
| 0 | 1 | 1 | - | 0 | 1 | 1 | 1 | 0 | 1 | 1 | 2 |
| 1 | 0 | 1 |   |   |   |   |   |   |   |   |   |

†*Histionotus oberndorferi*

|   |   |   |   |   |   |   |   |   |   |   |   |
|---|---|---|---|---|---|---|---|---|---|---|---|
| 3 | 0 | 0 | 0 | - | 1 | ? | ? | ? | 0 | 0 | - |
| ? | ? | ? | ? | 0 | ? | ? | ? | ? | ? | ? | ? |
| ? | ? | ? | ? | ? | ? | ? | ? | ? | ? | ? | ? |
| ? | ? | ? | ? | ? | 0 | ? | 0 | 0 | 1 | 1 | 0 |
| ? | ? | 1 | ? | ? | ? | 0 | ? | ? | ? | ? | ? |
| ? | 1 | 1 | 0 | 0 | ? | 0 | 0 | 4 | 0 | 0 | 1 |
| - | 0 | ? | ? | ? | ? | ? | ? | ? | ? | 0 | ? |
| ? | ? | ? | ? | ? | 0 | 1 | 1 | - | - | 0 | ? |
| ? | 0 | 1 | 2 | 1 | 3 | 0 | 1 | ? | ? | ? | ? |
| ? | 1 | 1 | 0 | 0 | 0 | 0 | 0 | 0 | 0 | ? | 0 |
| 0 | 0 | 0 | ? | ? | 0 | 4 | - | ? | 1 | ? | ? |
| 0 | 0 | 0 | 5 | 1 | 0 | 0 | 1 | ? | 1 | 1 | - |
| - | - | - | - | - | - | 0 | 1 | ? | 0 | 1 | 1 |
| 4 | 1 | 2 | 0 | 0 | ? | 0 | - | - | 0 | 0 | 1 |
| ? | 1 | ? | ? | ? | 1 | ? | ? | 0 | ? | 0 | 0 |
| 0 | 0 | 0 | 0 | ? | ? | 2 | 0 | 0 | - | 0 | ? |
| ? | 0 | ? | 1 | 0 | 0 | ? | 1 | 1 | 1 | 1 | 1 |
| 1 | ? | ? | ? | ? | ? | ? | ? | ? | 1 | 1 | 1 |
| 3 | 1 | 0 | 0 | ? | 0 | ? | ? | ? | ? | ? | ? |
| ? | ? | ? | ? | ? | ? | ? | ? | ? | ? | ? | ? |
| ? | ? | ? | ? | ? | ? | ? | ? | ? | ? | ? | ? |
| ? | ? | ? | ? | ? | ? | ? | ? | ? | ? | ? | ? |
| ? | ? | ? | ? | ? | ? | ? | ? | ? | ? | ? | ? |
| ? | ? | ? | ? | ? | ? | ? | ? | ? | ? | ? | ? |
| ? | ? | ? | ? | ? | ? | ? | ? | ? | ? | ? | ? |
| ? | 0 | ? | ? | ? | 3 | 2 | 1 | ? | ? | ? | ? |
| 0 | 0 | 0 | 0 | 0 | 0 | ? | ? | ? | 0 | 0 | ? |
| 1 | 3 | ? | ? | 0 | 0 | ? | ? | ? | ? | 1 | 0 |
| 0 | ? | 0 | 2 | 1 | 1 | 0 | ? | ? | ? | ? | ? |
| ? | ? | ? | ? | ? | ? | ? | ? | ? | ? | ? | ? |
| 0 | ? | ? |   |   |   |   |   |   |   |   |   |

†*Ichthyokentema purbeckensis*

|   |   |   |   |   |   |   |   |   |   |   |   |
|---|---|---|---|---|---|---|---|---|---|---|---|
| 0 | 0 | 1 | 0 | - | 0 | 0 | 0 | - | 0 | 0 | - |
| 1 | 2 | 4 | 1 | 1 | 0 | - | 0 | 0 | - | ? | 1 |
| 0 | 1 | 1 | 0 | 1 | 1 | 0 | 2 | 0 | 1 | 0 | 0 |
| 0 | 0 | 3 | 1 | 0 | 0 | 0 | 0 | 1 | 0 | 1 | 1 |
| 3 | 1 | 1 | 0 | 0 | 1 | 0 | 1 | 1 | 1 | 1 | 0 |
| ? | 2 | 0 | 0 | 0 | 0 | 0 | 2 | 2 | 0 | 1 | - |
| ? | 1 | ? | ? | ? | ? | ? | ? | 0 | 1 | 0 | 0 |
| 0 | 0 | 0 | 0 | 1 | 0 | 0 | 0 | 3 | 0 | 0 | 0 |
| 0 | 0 | 0 | 1 | 0 | 2 | 0 | 0 | 0 | 0 | 0 | 0 |
| 0 | 1 | 0 | 0 | 0 | 1 | 1 | 0 | 0 | 0 | 3 | 0 |
| 0 | 0 | 2 | 0 | 1 | 1 | 2 | 0 | 0 | 0 | - | - |
| - | 0 | 0 | 0 | 0 | 0 | 1 | 1 | ? | 1 | 0 | 0 |

|   |   |   |   |   |   |   |   |   |   |   |   |
|---|---|---|---|---|---|---|---|---|---|---|---|
| 0 | - | 0 | 0 | - | 0 | 1 | 0 | - | 0 | 1 | 1 |
| 2 | 1 | 1 | 0 | 0 | 2 | 1 | 0 | 0 | 1 | 1 | 1 |
| 4 | 0 | 0 | 0 | 1 | 0 | - | 0 | 0 | 0 | 0 | 0 |
| 0 | 2 | 1 | 0 | 0 | 0 | 2 | 0 | 0 | - | 0 | 0 |
| - | 0 | 0 | 0 | 0 | 0 | 4 | 1 | 1 | 2 | 1 | 1 |
| 0 | 0 | ? | 1 | ? | ? | ? | ? | ? | 0 | - | 0 |
| 0 | 0 | 0 | 0 | 1 | 0 | 0 | - | 0 | 1 | 0 | ? |
| - | - | 0 | ? | 0 | - | 1 | ? | ? | ? | ? | 0 |
| 0 | - | ? | ? | ? | ? | ? | ? | ? | ? | ? | ? |
| ? | ? | ? | ? | - | - | ? | ? | ? | ? | ? | ? |
| ? | ? | ? | ? | ? | ? | ? | ? | ? | ? | ? | ? |
| ? | 0 | ? | ? | ? | 2 | 3 | ? | ? | ? | ? | ? |
| ? | ? | 0 | 0 | ? | 0 | 0 | 0 | 0 | 0 | 0 | 1 |
| 0 | 0 | ? | ? | 0 | 0 | 0 | ? | ? | ? | 1 | ? |
| ? | 2 | 0 | 2 | 0 | 0 | 0 | 0 | 0 | 0 | 2 | 0 |
| ? | 2 | 1 | - | 0 | 0 | ? | ? | 0 | 0 | ? | ? |
| 0 | 0 | 0 |   |   |   |   |   |   |   |   |   |

†*Ionoscopus cyprinoides*

|   |   |   |   |   |   |   |   |   |   |   |   |
|---|---|---|---|---|---|---|---|---|---|---|---|
| 0 | 0 | 0 | 1 | - | - | - | - | - | 0 | - | - |
| ? | ? | ? | ? | 0 | - | - | 1 | 1 | 0 | 4 | 1 |
| 1 | 1 | 0 | 0 | ? | 1 | 0 | ? | 0 | 1 | 2 | 0 |
| 0 | 0 | 0 | 1 | 1 | 0 | 0 | ? | ? | 0 | 1 | 0 |
| ? | 3 | 0 | 0 | 2 | 0 | - | ? | ? | 1 | 0 | ? |
| ? | 0 | ? | 0 | 0 | 0 | ? | ? | 0 | 1 | - | - |
| 0 | 0 | 0 | ? | ? | ? | 0 | 0 | 2 | 1 | 1 | 0 |
| 2 | 0 | 0 | 0 | 2 | 0 | 0 | 0 | 1 | 1 | 2 | ? |
| 1 | 0 | - | 2 | ? | 2 | 0 | 0 | 0 | 3 | 1 | 0 |
| ? | 1 | 1 | 0 | 0 | 0 | 1 | 0 | 0 | 0 | 3 | 0 |
| 0 | 1 | 0 | 1 | 8 | 0 | 3 | 1 | 1 | 0 | - | - |
| - | 0 | 0 | 3 | 1 | 0 | 0 | 1 | ? | 1 | 0 | 2 |
| 0 | 0 | 1 | 0 | 0 | 0 | 0 | 0 | 0 | 0 | 1 | 1 |
| 0 | 1 | 0 | 1 | 1 | 1 | 1 | 0 | 0 | 0 | 0 | 1 |
| 0 | 1 | 1 | 0 | 0 | 1 | 0 | 0 | 0 | 0 | 0 | 0 |
| 0 | 0 | 0 | 0 | 2 | 0 | 2 | 0 | 0 | - | 0 | 0 |
| - | 0 | 0 | 0 | 0 | 0 | 4 | 1 | 1 | 1 | 1 | 1 |
| 0 | 1 | 2 | 1 | ? | ? | ? | ? | ? | ? | ? | 1 |
| 3 | ? | ? | 1 | ? | 0 | 0 | 0 | 2 | 0 | 0 | 0 |
| 0 | - | 1 | 0 | 0 | 0 | 0 | 1 | 1 | 0 | 0 | 0 |
| 0 | - | 0 | 0 | 0 | 1 | 0 | 0 | 0 | 0 | 0 | ? |
| ? | ? | 0 | 0 | 0 | 0 | 1 | 1 | 0 | 0 | 0 | 0 |
| 1 | - | 1 | 0 | 0 | 0 | 0 | 0 | 0 | - | - | - |
| - | 0 | 0 | 0 | 1 | 1 | 2 | ? | 0 | 0 | 1 | 0 |
| 0 | 2 | 0 | 1 | - | 1 | 0 | 2 | 1 | 0 | 0 | 1 |
| 0 | 0 | 0 | 1 | 0 | 0 | 0 | 1 | 1 | 0 | 1 | 0 |
| 0 | 0 | 0 | 0 | 0 | 0 | 0 | 0 | ? | ? | 2 | 0 |
| ? | 2 | 1 | - | 0 | - | 0 | ? | 0 | ? | 0 | 0 |
| 0 | 0 | 0 |   |   |   |   |   |   |   |   |   |

†*Isanichthys lertboosi*

|   |   |   |   |   |   |   |   |   |   |   |   |
|---|---|---|---|---|---|---|---|---|---|---|---|
| 0 | 0 | 0 | 0 | - | 0 | ? | 1 | 2 | 0 | 1 | 0 |
| ? | ? | ? | ? | 0 | ? | ? | ? | 1 | 0 | 1 | 2 |
| 1 | 0 | - | 0 | 0 | ? | ? | ? | 1 | - | - | 1 |

|   |   |   |   |   |   |   |   |   |   |   |   |
|---|---|---|---|---|---|---|---|---|---|---|---|
| 1 | 0 | ? | ? | 0 | 0 | 0 | 0 | 0 | ? | 1 | 0 |
| ? | ? | ? | ? | ? | ? | ? | ? | ? | ? | ? | ? |
| ? | ? | ? | 0 | 0 | ? | ? | ? | 1 | ? | ? | ? |
| ? | ? | ? | ? | ? | ? | ? | ? | ? | ? | ? | ? |
| ? | ? | ? | ? | ? | 0 | 0 | 0 | 3 | ? | 0 | ? |
| ? | 0 | 0 | 0 | 0 | 0 | 0 | 1 | 0 | 1 | 1 | 0 |
| 3 | ? | 1 | 0 | 0 | 1 | 2 | 0 | 1 | 1 | 4 | 0 |
| 0 | 0 | 2 | 1 | 3 | 0 | 0 | 0 | 0 | 1 | 1 | 1 |
| 0 | 0 | ? | ? | ? | ? | ? | ? | ? | ? | 0 | 3 |
| 1 | 0 | 0 | 0 | 1 | 0 | 0 | 1 | 1 | 0 | 1 | 1 |
| 3 | 1 | 2 | 0 | 0 | 1 | 1 | 0 | 0 | 1 | 0 | 1 |
| 3 | 1 | ? | ? | ? | ? | ? | ? | 0 | ? | 0 | 1 |
| 0 | 0 | 0 | 0 | 1 | ? | 2 | 0 | 0 | - | 0 | 0 |
| - | 0 | 0 | 0 | 0 | 0 | 4 | 1 | ? | ? | ? | 1 |
| 0 | 0 | 2 | 0 | - | ? | ? | ? | ? | ? | ? | 0 |
| 0 | 0 | 0 | 0 | - | 0 | ? | - | 0 | 0 | 0 | ? |
| - | - | ? | ? | ? | - | ? | ? | ? | ? | ? | ? |
| ? | ? | ? | ? | ? | ? | ? | ? | ? | ? | ? | ? |
| ? | ? | ? | ? | - | - | ? | ? | ? | ? | ? | ? |
| ? | ? | ? | ? | ? | ? | ? | ? | ? | ? | ? | ? |
| ? | ? | ? | ? | ? | 1 | 2 | ? | ? | ? | 0 | 0 |
| 0 | 0 | 0 | 0 | ? | 0 | 0 | - | ? | ? | 0 | ? |
| 0 | ? | ? | ? | ? | ? | ? | ? | ? | ? | 1 | 1 |
| ? | ? | 0 | 2 | 1 | 1 | 0 | 0 | ? | ? | 2 | ? |
| ? | ? | ? | ? | ? | ? | ? | ? | ? | 0 | 0 | ? |
| 0 | 0 | 0 |   |   |   |   |   |   |   |   |   |

†*Isanichthys palustris*

|   |   |   |   |   |   |   |   |   |   |   |   |
|---|---|---|---|---|---|---|---|---|---|---|---|
| 0 | 0 | 0 | 0 | - | 0 | ? | ? | ? | 0 | ? | ? |
| ? | ? | ? | ? | 0 | ? | ? | ? | 1 | 0 | ? | ? |
| ? | ? | ? | ? | ? | ? | ? | ? | ? | ? | ? | ? |
| ? | ? | ? | ? | ? | 0 | ? | ? | ? | ? | ? | ? |
| ? | ? | ? | ? | ? | ? | ? | ? | ? | ? | ? | ? |
| ? | ? | ? | 0 | 0 | ? | ? | ? | 1 | ? | ? | ? |
| ? | ? | ? | ? | ? | ? | ? | ? | ? | ? | ? | ? |
| ? | ? | ? | ? | ? | 1 | 0 | 0 | 4 | 0 | 0 | ? |
| ? | 0 | 0 | 0 | 0 | 0 | 0 | 1 | ? | ? | ? | ? |
| ? | ? | 1 | 0 | 0 | 1 | 2 | 0 | 1 | 1 | 4 | 0 |
| 0 | 0 | 2 | 1 | 3 | 0 | ? | 0 | 0 | 1 | 1 | ? |
| 0 | 0 | ? | ? | ? | ? | ? | ? | ? | ? | 0 | 3 |
| 1 | 2 | 0 | 0 | 0 | 0 | ? | ? | ? | 0 | 1 | 1 |
| 2 | 1 | 3 | 0 | 0 | 1 | 1 | 0 | 0 | 1 | 0 | 1 |
| ? | 1 | ? | ? | ? | ? | ? | ? | 0 | ? | ? | 0 |
| 0 | 0 | 0 | 0 | ? | ? | 2 | 0 | 0 | - | 0 | 0 |
| - | 0 | 0 | 0 | 0 | 0 | 0 | 1 | 1 | ? | 1 | 1 |
| 0 | 0 | ? | 0 | - | ? | ? | ? | ? | ? | ? | ? |
| ? | ? | ? | ? | ? | 0 | ? | ? | ? | ? | ? | ? |
| ? | ? | ? | ? | ? | ? | ? | ? | ? | ? | ? | ? |
| ? | ? | ? | ? | ? | ? | ? | ? | ? | ? | ? | ? |
| ? | ? | ? | ? | ? | ? | ? | ? | ? | ? | ? | ? |
| ? | ? | ? | ? | ? | ? | ? | ? | ? | ? | ? | ? |
| ? | ? | ? | ? | ? | ? | ? | ? | ? | ? | ? | ? |
| ? | ? | ? | ? | ? | ? | ? | ? | ? | ? | ? | ? |



|   |   |   |   |   |   |   |   |   |   |   |   |
|---|---|---|---|---|---|---|---|---|---|---|---|
| ? | ? | ? | ? | ? | ? | ? | ? | ? | ? | ? | ? |
| ? | ? | ? | ? | ? | ? | ? | ? | ? | ? | ? | ? |
| ? | ? | ? | ? | ? | ? | ? | ? | ? | ? | ? | ? |
| ? | ? | ? | ? | ? | ? | ? | ? | ? | ? | ? | ? |
| ? | ? | ? |   |   |   |   |   |   |   |   |   |

†*Knerichthys bronni*

|   |   |   |   |   |   |   |   |   |   |   |   |
|---|---|---|---|---|---|---|---|---|---|---|---|
| ? | ? | 1 | 0 | - | 1 | 0 | 0 | - | ? | ? | ? |
| ? | ? | ? | ? | 0 | - | - | ? | ? | ? | ? | ? |
| ? | ? | ? | ? | ? | ? | ? | ? | ? | ? | ? | ? |
| 1 | ? | ? | ? | ? | 0 | ? | ? | ? | ? | ? | ? |
| ? | ? | ? | ? | ? | ? | ? | ? | ? | ? | ? | ? |
| ? | ? | ? | 0 | 0 | ? | ? | ? | ? | 1 | ? | ? |
| ? | ? | ? | ? | ? | ? | ? | ? | ? | ? | 1 | ? |
| 0 | ? | ? | ? | ? | 0 | ? | ? | ? | ? | ? | ? |
| ? | 0 | ? | ? | ? | 1 | ? | ? | 0 | 0 | 2 | 0 |
| ? | ? | 0 | 0 | ? | ? | ? | ? | ? | ? | ? | 0 |
| 0 | 0 | 1 | 1 | 1 | 1 | ? | ? | 0 | 0 | - | - |
| - | 0 | ? | ? | ? | ? | ? | 1 | ? | ? | 0 | 3 |
| 0 | 1 | 1 | 0 | ? | 0 | ? | ? | ? | 0 | 1 | 0 |
| 0 | 1 | ? | 0 | 0 | 2 | 1 | 0 | 0 | ? | 1 | ? |
| ? | ? | ? | 0 | ? | ? | ? | ? | ? | ? | ? | 0 |
| ? | ? | ? | ? | ? | ? | 2 | 0 | 0 | - | 0 | ? |
| ? | ? | 1 | 0 | 0 | 2 | 0 | 1 | 2 | ? | 0 | 1 |
| ? | 0 | ? | ? | ? | ? | ? | ? | ? | ? | ? | ? |
| 0 | ? | ? | ? | ? | 0 | 0 | ? | ? | ? | ? | ? |
| ? | ? | ? | ? | ? | ? | ? | ? | ? | ? | ? | ? |
| ? | ? | - | ? | ? | ? | ? | ? | ? | ? | ? | ? |
| ? | ? | ? | ? | - | - | ? | ? | ? | ? | ? | ? |
| ? | ? | ? | ? | ? | ? | ? | ? | ? | ? | ? | ? |
| ? | 0 | ? | ? | ? | 1 | ? | 0 | ? | 0 | 0 | ? |
| 0 | 2 | 0 | 0 | ? | 0 | 0 | 1 | 1 | 0 | 0 | ? |
| ? | ? | ? | ? | ? | ? | ? | ? | ? | ? | ? | ? |
| ? | ? | ? | 1 | 0 | ? | 1 | ? | ? | ? | ? | ? |
| ? | ? | ? | ? | ? | ? | ? | ? | 0 | ? | ? | ? |
| ? | ? | ? |   |   |   |   |   |   |   |   |   |

†*Kyphosichthys grandei*

|   |   |   |   |   |   |   |   |   |   |   |   |
|---|---|---|---|---|---|---|---|---|---|---|---|
| 0 | 0 | 0 | 0 | - | 1 | 0 | 1 | 1 | 0 | 1 | 0 |
| ? | ? | ? | ? | 0 | ? | ? | ? | ? | ? | ? | ? |
| ? | ? | ? | ? | ? | ? | ? | ? | ? | ? | ? | ? |
| ? | ? | ? | ? | 0 | 0 | ? | ? | ? | ? | ? | ? |
| ? | ? | 0 | 0 | 2 | ? | - | ? | ? | ? | ? | ? |
| ? | ? | ? | 0 | 0 | ? | ? | ? | 1 | 0 | 0 | 1 |
| - | ? | ? | ? | ? | ? | ? | ? | ? | ? | 0 | ? |
| ? | ? | ? | ? | ? | 0 | 0 | 1 | 4 | 0 | 0 | ? |
| ? | 0 | 0 | 0 | 0 | 0 | 0 | 0 | ? | 5 | ? | 0 |
| ? | 1 | 0 | 1 | 0 | 0 | 1 | 0 | 0 | 0 | 3 | 0 |
| ? | 0 | 0 | 1 | 1 | 1 | 0 | 0 | 0 | 1 | 1 | 0 |
| 0 | 0 | 0 | 3 | 1 | 0 | 0 | 1 | 0 | 1 | 0 | 2 |
| 0 | 0 | 1 | 1 | 0 | 0 | 0 | ? | ? | 0 | 1 | 1 |
| 3 | 1 | 0 | 1 | 0 | 3 | 1 | 0 | 0 | 0 | 0 | 1 |
| ? | ? | ? | 0 | ? | 0 | - | 0 | ? | ? | 2 | 0 |



|   |   |   |   |   |     |   |   |   |   |   |   |
|---|---|---|---|---|-----|---|---|---|---|---|---|
| - | 0 | 0 | 0 | 1 | 1   | 0 | 0 | 1 | 1 | 0 | 3 |
| 3 | 0 | 0 | 0 | 2 | 1&2 | 0 | 0 | 4 | 0 | 0 | 0 |
| 1 | 0 | 0 | 0 | 1 | 1   | 0 | 1 | 0 | 4 | 1 | 0 |
| 0 | 1 | 1 | 1 | 0 | 1   | 2 | 0 | 1 | 1 | 4 | 0 |
| 1 | 0 | 2 | 0 | 3 | 1   | 0 | 0 | 0 | 1 | 2 | 0 |
| 1 | 1 | 0 | 2 | 1 | 0   | 0 | 1 | 0 | 1 | 0 | 3 |
| 0 | 2 | 0 | 0 | 0 | 0   | 0 | 1 | 2 | 1 | - | - |
| - | - | - | - | - | -   | ? | ? | ? | 0 | 0 | 1 |
| 2 | 1 | 1 | 0 | 0 | 1   | 1 | 0 | 1 | 1 | 0 | 0 |
| 0 | 1 | 0 | 0 | 0 | 0   | 3 | 0 | 0 | 1 | 0 | 0 |
| - | 1 | 0 | 0 | 0 | 1   | 0 | 1 | 0 | 2 | 0 | 0 |
| - | 0 | 4 | 0 | - | 0   | 1 | 1 | 1 | 1 | 2 | 1 |
| 0 | 0 | 1 | - | ? | 1   | 0 | 1 | 2 | 0 | 0 | 0 |
| 0 | - | 2 | 0 | ? | 1   | 0 | 0 | 1 | 1 | 0 | 0 |
| 0 | - | 1 | 0 | 0 | 0   | 0 | 0 | 0 | 0 | 0 | 0 |
| 0 | 0 | 1 | - | 0 | 0   | 1 | 0 | 0 | 0 | 0 | 4 |
| 1 | 0 | 0 | 0 | 0 | 0   | 0 | 0 | 0 | - | - | - |
| - | 1 | 1 | 0 | 0 | 3   | 2 | 3 | 3 | 1 | 0 | 0 |
| 0 | 0 | 0 | 0 | 2 | 0   | 0 | - | ? | 0 | 0 | 1 |
| 0 | 2 | 0 | 1 | 0 | 0   | 2 | 1 | 0 | 0 | 1 | 1 |
| 1 | 0 | 0 | 2 | 2 | 0   | 0 | 0 | 1 | 1 | 2 | 1 |
| 0 | 6 | 0 | 1 | 0 | 0   | 0 | 0 | 0 | 0 | 0 | 0 |
| 0 | 0 | 0 |   |   |     |   |   |   |   |   |   |

†*Leptolepis coryphaenoides*

|   |     |   |   |   |     |   |     |     |   |   |   |
|---|-----|---|---|---|-----|---|-----|-----|---|---|---|
| ? | 0   | ? | 2 | 0 | -   | - | -   | -   | 0 | - | - |
| 1 | 0   | ? | ? | 1 | 0   | - | 0   | 0   | - | 1 | 1 |
| 0 | ?   | ? | 0 | 0 | 1   | 1 | 0&1 | 0   | 1 | 1 | 1 |
| 0 | ?   | ? | 1 | 0 | 0   | 0 | 0   | 1   | 0 | 1 | 2 |
| 2 | 1   | 1 | 0 | 0 | 1   | 0 | 1   | ?   | 1 | 1 | 0 |
| ? | ?   | ? | 0 | 0 | ?   | ? | ?   | 2   | 0 | 1 | - |
| 1 | 0&1 | 1 | ? | ? | ?   | 1 | ?   | 3&4 | 1 | 0 | 2 |
| 0 | 1   | 0 | 0 | 1 | 0   | 0 | 0   | 1   | 0 | 1 | ? |
| 0 | 0   | 0 | 2 | 1 | 1   | 0 | 0   | 0   | 2 | 2 | ? |
| ? | 1   | 0 | 0 | 0 | 0   | 2 | 0   | 0   | 0 | 3 | 0 |
| 0 | 0   | 1 | 1 | 1 | 1   | 2 | 0   | 0   | 0 | - | - |
| - | 0   | ? | ? | ? | ?   | ? | 2   | 0   | 1 | 0 | 0 |
| 0 | -   | 1 | 0 | - | 0   | ? | -   | -   | 0 | 1 | 0 |
| 1 | 1   | 1 | 0 | 0 | 2   | 2 | -   | 0   | 1 | 1 | 1 |
| 1 | 0   | 1 | 1 | 1 | 1&3 | 1 | 1   | 0   | 0 | 0 | 0 |
| 0 | 0   | 1 | 0 | - | ?   | 3 | 0   | 0   | 0 | 0 | 0 |
| - | 1   | ? | 0 | 0 | 2   | 4 | 1   | 2   | 0 | 0 | 1 |
| 0 | 0   | 2 | 1 | 2 | ?   | ? | ?   | ?   | 1 | 1 | 0 |
| 0 | 0   | 0 | 0 | 2 | 0   | ? | -   | 1   | 1 | 1 | 0 |
| - | 0   | 0 | 0 | 0 | 0   | 0 | ?   | 1   | ? | 0 | 1 |
| 0 | -   | 1 | 1 | 1 | 0   | 1 | ?   | ?   | 1 | ? | 0 |
| 0 | 0   | 0 | 1 | 1 | 1   | 2 | 1   | 0   | 0 | 3 | 2 |
| 1 | 1   | 0 | 0 | 1 | ?   | 0 | 0   | 1   | 2 | 0 | 0 |
| 0 | 0   | 0 | 1 | 1 | 2   | 3 | ?   | 3   | 2 | 1 | 1 |
| 1 | 2   | 1 | 1 | - | 2   | 1 | 1   | 1   | 1 | 1 | 1 |
| 0 | 0   | 1 | 0 | 1 | 0   | 0 | 0   | ?   | 1 | 1 | 3 |
| ? | 0   | 1 | 2 | 0 | 0   | 0 | 0   | 0   | 0 | 3 | 1 |

|                                |   |   |   |     |   |   |     |   |   |   |   |
|--------------------------------|---|---|---|-----|---|---|-----|---|---|---|---|
| 1                              | 2 | 1 | - | 0   | 0 | 1 | 1   | 0 | 1 | 0 | 2 |
| 1                              | 0 | 1 |   |     |   |   |     |   |   |   |   |
| † <i>Luisiella feruglioi</i>   |   |   |   |     |   |   |     |   |   |   |   |
| 0                              | 0 | 1 | 2 | 0   | - | - | -   | - | 0 | - | - |
| ?                              | ? | ? | ? | 1   | 0 | - | ?   | ? | ? | ? | ? |
| ?                              | ? | ? | ? | ?   | ? | ? | ?   | ? | ? | ? | ? |
| 0                              | ? | ? | 1 | 0   | 0 | ? | ?   | ? | 0 | 1 | 2 |
| 2                              | ? | ? | ? | ?   | ? | ? | 0   | - | 1 | 1 | ? |
| ?                              | 1 | 0 | 0 | 0   | 1 | 0 | 0   | 1 | 0 | 1 | - |
| 1                              | 0 | 1 | ? | ?   | ? | 1 | 1   | 4 | 1 | 0 | ? |
| 0                              | 1 | 0 | 0 | 3   | 0 | 0 | 0   | 3 | 0 | 1 | ? |
| 0                              | 0 | 0 | 2 | 1   | 1 | 0 | 0   | 0 | 2 | 2 | 1 |
| 3                              | 1 | 0 | 0 | 0   | 0 | 3 | -   | 0 | 0 | 3 | 0 |
| 0                              | 0 | 1 | 1 | 0   | 1 | 2 | 0   | 0 | 0 | - | - |
| -                              | 0 | 0 | 0 | 0   | 0 | 1 | 4   | - | 1 | 1 | - |
| -                              | - | - | - | -   | - | 0 | -   | - | 0 | 1 | 0 |
| 1                              | 1 | 1 | 0 | 0   | 2 | 2 | -   | 0 | 1 | 0 | 1 |
| 1                              | 0 | 3 | 1 | 1   | 4 | ? | 1   | 0 | 0 | - | 0 |
| 1                              | - | - | - | -   | ? | 3 | 0   | 0 | 0 | 0 | 0 |
| -                              | 0 | 1 | 0 | 0   | 2 | 4 | 1   | 2 | 0 | 0 | 1 |
| 0                              | 0 | 1 | 1 | 2   | ? | ? | ?   | ? | ? | ? | 0 |
| 0                              | 0 | 0 | 0 | 1   | 0 | 0 | ?   | ? | ? | 1 | 0 |
| -                              | 0 | 0 | 0 | 1   | 0 | 0 | 1   | 1 | 1 | 0 | 1 |
| 0                              | - | 0 | 1 | 1   | 0 | 1 | 0   | 1 | 1 | 1 | 0 |
| 0                              | 0 | 0 | 1 | 0   | 0 | 2 | 1   | 0 | 0 | 3 | 3 |
| 1                              | 1 | 0 | 0 | 0&1 | 0 | 0 | 0   | 1 | 1 | 0 | 1 |
| 0                              | 0 | 0 | 1 | 1   | 2 | 3 | ?   | 3 | 2 | 1 | 1 |
| 1                              | 2 | 1 | 1 | -   | 2 | 1 | 1   | 1 | 1 | 1 | 1 |
| 0                              | 0 | 1 | 1 | 1   | 0 | 0 | 0&2 | 0 | 1 | 1 | 3 |
| 3                              | 0 | 1 | 2 | 0   | 0 | ? | 0   | 0 | 1 | 3 | 1 |
| 0                              | 2 | 1 | - | 0   | 0 | 1 | 1   | 0 | 1 | 0 | 2 |
| 1                              | 0 | ? |   |     |   |   |     |   |   |   |   |
| † <i>Macrepistius arenatus</i> |   |   |   |     |   |   |     |   |   |   |   |
| ?                              | 0 | 0 | 0 | -   | 1 | ? | ?   | ? | ? | ? | ? |
| 1                              | 0 | 0 | ? | 0   | - | - | ?   | 1 | 0 | 1 | 1 |
| 0                              | ? | ? | 0 | ?   | 1 | 0 | ?   | 0 | 1 | 2 | 0 |
| 0                              | 0 | 1 | 1 | 1   | 0 | 0 | 0   | 0 | 0 | ? | ? |
| 3                              | ? | 0 | 0 | 2   | 0 | - | 0   | - | ? | ? | ? |
| ?                              | ? | ? | 0 | 0   | ? | ? | ?   | 0 | ? | ? | ? |
| ?                              | ? | ? | ? | ?   | ? | ? | ?   | ? | ? | ? | ? |
| ?                              | ? | ? | ? | ?   | 0 | 0 | 0   | 4 | - | 0 | 1 |
| 0                              | 0 | 0 | 2 | 1   | 0 | 0 | 1   | 0 | ? | ? | ? |
| ?                              | ? | ? | 0 | 0   | 1 | 0 | 1   | 2 | - | 3 | 1 |
| 0                              | 1 | 5 | 0 | 8   | 0 | 1 | 0   | 2 | 0 | - | - |
| -                              | 0 | ? | ? | ?   | ? | ? | ?   | ? | ? | 0 | 3 |
| 0                              | 0 | 0 | 0 | 0   | 0 | 0 | ?   | ? | 0 | 1 | 1 |
| 1                              | 1 | 0 | 1 | 0   | ? | 1 | 0   | 0 | 0 | 0 | 1 |
| 0                              | 1 | ? | ? | ?   | 0 | - | ?   | 0 | 0 | 0 | 0 |
| 0                              | 0 | 0 | 2 | ?   | ? | 2 | 0   | 0 | - | 0 | 0 |
| -                              | 0 | 0 | 0 | 0   | 0 | 0 | 1   | ? | ? | 1 | 1 |
| 0                              | ? | ? | ? | ?   | ? | ? | ?   | ? | ? | ? | ? |

|   |   |   |   |   |   |   |   |   |   |   |   |
|---|---|---|---|---|---|---|---|---|---|---|---|
| ? | ? | ? | 1 | ? | ? | ? | 0 | 2 | 0 | 0 | ? |
| 2 | - | ? | ? | ? | 0 | ? | ? | ? | ? | ? | ? |
| ? | ? | ? | ? | ? | ? | ? | ? | ? | ? | ? | ? |
| ? | ? | ? | ? | ? | ? | ? | ? | ? | ? | ? | ? |
| ? | ? | ? | ? | ? | ? | ? | ? | ? | ? | ? | ? |
| ? | 0 | ? | ? | ? | 1 | ? | ? | ? | ? | ? | ? |
| 0 | ? | 0 | ? | 2 | 0 | ? | - | ? | ? | ? | ? |
| 1 | ? | ? | ? | ? | ? | ? | ? | ? | ? | ? | ? |
| ? | ? | ? | ? | ? | ? | ? | ? | ? | ? | ? | ? |
| ? | ? | ? | ? | ? | ? | ? | ? | ? | ? | ? | ? |
| ? | ? | ? | ? | ? | ? | ? | ? | ? | ? | ? | ? |

†*Macrosemimimus fegerti*

|   |   |   |   |     |     |     |   |   |   |   |   |
|---|---|---|---|-----|-----|-----|---|---|---|---|---|
| 0 | 0 | 1 | 0 | -   | 2   | 0   | 1 | 2 | 0 | 0 | - |
| ? | ? | ? | ? | 0   | ?   | ?   | ? | ? | ? | ? | ? |
| ? | ? | ? | ? | ?   | ?   | ?   | ? | ? | ? | ? | ? |
| ? | ? | ? | ? | 0   | 0   | 0   | ? | ? | 0 | 1 | 0 |
| ? | ? | 1 | 0 | ?   | ?   | 0   | ? | ? | 1 | 1 | ? |
| ? | 1 | ? | 0 | 0   | ?   | 0   | 0 | 2 | 0 | 0 | 1 |
| - | 0 | ? | ? | ?   | ?   | 0   | 0 | 3 | ? | 0 | 4 |
| ? | ? | ? | ? | 0   | 0   | 0   | 1 | 4 | 0 | 0 | ? |
| ? | 0 | 0 | 0 | 1   | 1   | 0   | 1 | 0 | ? | 1 | 0 |
| ? | 1 | 0 | 0 | 0   | 0   | 1&2 | 0 | 0 | 0 | 3 | 0 |
| 0 | 0 | ? | ? | 7   | 0   | -   | 0 | 0 | 1 | 3 | 2 |
| 0 | 0 | 0 | 3 | 1   | 0   | 0   | 1 | ? | 1 | 0 | 1 |
| 0 | 0 | 1 | 0 | -   | 0   | 0   | 1 | 1 | 0 | 1 | 1 |
| 4 | 3 | ? | 0 | 0   | 1   | 1   | 0 | 0 | 1 | ? | 1 |
| 0 | 1 | ? | 0 | 0   | 1   | 1   | ? | 0 | 0 | 0 | ? |
| 0 | 0 | ? | 2 | 2&3 | 1&2 | 2   | 0 | 1 | - | 0 | 0 |
| - | 0 | 0 | 0 | 0   | 0   | 4   | 1 | 1 | 3 | 1 | 1 |
| 0 | 0 | 3 | 0 | -   | ?   | ?   | ? | ? | 1 | 1 | 0 |
| 0 | 0 | 1 | 0 | ?   | 0   | 0   | ? | ? | ? | ? | ? |
| ? | ? | ? | ? | ?   | ?   | ?   | ? | ? | ? | ? | ? |
| ? | ? | ? | ? | ?   | ?   | ?   | ? | ? | ? | ? | ? |
| ? | ? | ? | ? | ?   | ?   | ?   | ? | ? | ? | ? | ? |
| ? | ? | ? | ? | ?   | ?   | ?   | ? | ? | ? | ? | ? |
| ? | ? | ? | ? | ?   | ?   | ?   | ? | ? | ? | ? | ? |
| ? | 0 | ? | ? | ?   | 3   | 3   | 1 | ? | 2 | ? | ? |
| 0 | 0 | 0 | 0 | 1   | 0   | 0   | - | ? | 0 | 0 | ? |
| 0 | 0 | ? | ? | 0   | 0   | 0   | ? | ? | 0 | 1 | 2 |
| 0 | 2 | 0 | 2 | 1   | 1   | 0   | 0 | 1 | 0 | 2 | 1 |
| 1 | 4 | ? | ? | ?   | ?   | 0   | 0 | 0 | 0 | 0 | ? |
| 0 | 0 | 0 |   |     |     |     |   |   |   |   |   |

†*Macrosemius rostratus*

|   |   |   |   |   |   |   |   |   |   |   |   |
|---|---|---|---|---|---|---|---|---|---|---|---|
| 3 | 0 | 1 | 0 | - | 1 | 0 | 0 | - | 0 | - | - |
| ? | ? | ? | ? | 0 | ? | ? | ? | ? | ? | ? | 2 |
| 1 | 0 | - | 0 | ? | 1 | 0 | ? | 1 | - | - | 1 |
| 0 | ? | ? | 1 | ? | 0 | ? | 0 | 0 | 1 | 1 | 0 |
| ? | 2 | 1 | 0 | 0 | 1 | 0 | ? | ? | 1 | 0 | ? |
| 0 | 1 | 1 | 0 | 0 | ? | 0 | 0 | 4 | 0 | 0 | 1 |
| - | 0 | 0 | ? | ? | ? | 0 | ? | 3 | 1 | 0 | ? |
| ? | 0 | 0 | 0 | 2 | 0 | 1 | 1 | - | 0 | - | ? |
| ? | 0 | 0 | 2 | 1 | 3 | 0 | 1 | 0 | 2 | 2 | 0 |

|   |   |   |   |   |   |   |   |   |   |   |   |
|---|---|---|---|---|---|---|---|---|---|---|---|
| 3 | 1 | 1 | 0 | 1 | 0 | ? | ? | ? | ? | 3 | 0 |
| 0 | 0 | 0 | 1 | 7 | 0 | 4 | - | 0 | 1 | 3 | 0 |
| 0 | 0 | 0 | 5 | 1 | 0 | 0 | 1 | 0 | 1 | 1 | - |
| - | - | - | - | - | - | 0 | 1 | 0 | 0 | 1 | 1 |
| 4 | 1 | 0 | 0 | 0 | ? | 0 | - | - | 0 | 0 | 1 |
| 0 | 1 | 1 | 0 | 0 | 1 | 1 | 0 | 0 | 0 | 0 | 0 |
| 0 | 0 | 0 | 0 | 3 | 3 | 2 | 0 | 0 | - | 0 | 0 |
| - | 0 | 1 | 1 | 0 | 0 | 4 | 1 | 1 | 1 | 1 | 1 |
| 1 | 1 | 3 | 0 | - | ? | ? | ? | 1 | ? | 0 | 1 |
| 3 | 1 | - | 0 | ? | 0 | 0 | - | 1 | 0 | 0 | ? |
| ? | - | 0 | ? | ? | ? | ? | ? | ? | ? | ? | ? |
| ? | ? | ? | ? | ? | ? | ? | ? | ? | ? | ? | ? |
| ? | ? | ? | ? | ? | ? | ? | ? | ? | ? | ? | ? |
| ? | ? | ? | ? | ? | ? | ? | ? | ? | ? | ? | ? |
| ? | 1 | ? | 0 | ? | 3 | 2 | 1 | ? | 1 | 0 | 0 |
| 0 | 0 | 0 | 0 | 0 | 0 | 0 | - | ? | 0 | ? | 1 |
| 2 | 2 | 0 | 1 | 0 | 0 | ? | ? | 1 | 1 | 1 | 3 |
| ? | 1 | 1 | 2 | 1 | 1 | 0 | 0 | 0 | 0 | ? | ? |
| 1 | ? | 1 | - | 0 | ? | 0 | 0 | 0 | 1 | 0 | 0 |
| 1 | 0 | 0 |   |   |   |   |   |   |   |   |   |

†*Masillosteus janeae*

|   |   |   |   |   |   |   |   |   |   |   |   |
|---|---|---|---|---|---|---|---|---|---|---|---|
| 1 | 0 | 0 | 0 | - | 0 | 1 | 1 | 2 | 0 | 0 | - |
| ? | ? | ? | ? | 0 | ? | ? | ? | 1 | 0 | ? | ? |
| ? | 0 | - | ? | ? | ? | ? | 0 | ? | ? | ? | 1 |
| ? | ? | ? | ? | 1 | - | ? | ? | ? | 1 | 1 | 0 |
| ? | ? | ? | ? | ? | ? | ? | ? | ? | 1 | 0 | ? |
| ? | 3 | 0 | 1 | 0 | ? | ? | ? | 3 | 0 | 0 | 1 |
| - | ? | ? | ? | ? | ? | ? | ? | ? | ? | 0 | 3 |
| ? | ? | ? | ? | ? | 1 | 0 | 0 | 4 | 0 | 0 | ? |
| ? | 0 | 0 | 1 | 0 | 1 | 0 | 1 | 0 | 4 | 1 | 0 |
| ? | 1 | 1 | 1 | 0 | 1 | 2 | 0 | 1 | 1 | 4 | 1 |
| 1 | 0 | 2 | 0 | 3 | 1 | 2 | 0 | 0 | 1 | 4 | 3 |
| 1 | 0 | 0 | 5 | 1 | 0 | 0 | 1 | ? | 1 | 0 | 3 |
| 0 | 2 | 0 | 0 | 0 | 0 | 0 | 1 | 2 | 1 | - | - |
| - | - | - | - | - | - | 0 | - | - | 0 | 0 | 1 |
| 2 | 1 | ? | 0 | ? | 1 | 1 | 0 | 1 | ? | 2 | - |
| 0 | 0 | 1 | 0 | 2 | 2 | 3 | 0 | 0 | 1 | 0 | 0 |
| - | 1 | 0 | 0 | 0 | 0 | 0 | 1 | 0 | 2 | 0 | 0 |
| - | 0 | ? | 0 | - | ? | ? | ? | ? | ? | ? | ? |
| 0 | ? | ? | - | ? | 1 | 0 | 1 | 2 | 0 | 0 | 0 |
| ? | - | 2 | ? | ? | 1 | ? | ? | ? | ? | ? | ? |
| ? | ? | ? | ? | ? | ? | ? | ? | ? | ? | ? | ? |
| ? | ? | ? | ? | ? | ? | ? | ? | ? | ? | ? | ? |
| ? | ? | ? | ? | ? | ? | ? | ? | ? | ? | ? | ? |
| ? | ? | ? | ? | ? | ? | ? | ? | ? | ? | ? | ? |
| ? | 1 | ? | ? | ? | 3 | 2 | 3 | ? | 1 | ? | ? |
| 0 | 0 | 0 | 0 | - | 0 | 0 | - | ? | 0 | 0 | ? |
| 0 | 2 | ? | ? | 0 | 0 | 2 | ? | ? | 0 | 1 | 1 |
| 1 | 1 | 0 | 2 | 2 | 0 | 0 | 0 | 1 | 1 | 2 | 1 |
| 0 | 6 | 1 | - | 0 | ? | ? | ? | 0 | 0 | 0 | ? |
| 0 | 0 | 0 |   |   |   |   |   |   |   |   |   |

†*Masillosteus kelleri*

|   |   |   |   |   |   |   |   |   |   |   |   |
|---|---|---|---|---|---|---|---|---|---|---|---|
| 1 | 0 | 0 | 0 | - | 0 | ? | ? | ? | 0 | 0 | - |
| ? | ? | ? | ? | 0 | ? | ? | ? | ? | ? | ? | ? |
| ? | ? | ? | ? | ? | ? | ? | ? | ? | ? | ? | ? |
| ? | ? | ? | ? | 1 | - | ? | ? | ? | ? | 1 | 0 |
| ? | ? | ? | ? | ? | ? | ? | ? | ? | ? | ? | ? |
| ? | ? | ? | ? | 0 | ? | ? | ? | 3 | 0 | 0 | 1 |
| - | ? | ? | ? | ? | ? | ? | ? | ? | ? | 0 | ? |
| ? | ? | ? | ? | ? | 1 | 0 | 0 | 4 | 0 | 0 | ? |
| ? | 0 | 0 | 1 | 0 | 1 | 0 | 1 | 0 | 4 | ? | 0 |
| 2 | 1 | 1 | 1 | 0 | 1 | 2 | 0 | 1 | 1 | 4 | 0 |
| 1 | 0 | 2 | 0 | 3 | 1 | 2 | 0 | 0 | 1 | 5 | 3 |
| 1 | 0 | 0 | 5 | 1 | 0 | 0 | 1 | ? | 1 | 0 | 3 |
| 0 | 2 | 0 | 0 | 0 | 0 | 0 | 1 | 2 | 1 | - | - |
| - | - | - | - | - | - | 0 | - | - | 0 | 0 | 1 |
| 2 | 1 | ? | 0 | ? | 1 | 1 | 0 | ? | ? | 2 | - |
| 0 | 0 | 1 | 0 | 2 | 2 | 3 | 0 | 0 | 1 | 0 | ? |
| ? | 1 | 1 | 0 | 0 | 1 | 4 | 1 | 0 | ? | 0 | 0 |
| - | 0 | 4 | 0 | - | ? | ? | ? | ? | ? | ? | ? |
| ? | ? | ? | - | ? | 1 | 0 | 1 | 2 | 0 | 0 | 0 |
| ? | - | 2 | ? | ? | 1 | ? | ? | ? | ? | ? | ? |
| ? | ? | ? | ? | ? | ? | ? | ? | ? | ? | ? | ? |
| ? | ? | ? | ? | ? | ? | ? | ? | ? | ? | ? | ? |
| ? | ? | ? | ? | ? | ? | ? | ? | ? | ? | ? | ? |
| ? | ? | ? | ? | ? | ? | ? | ? | ? | ? | ? | ? |
| ? | 1 | ? | ? | ? | 3 | 2 | 3 | ? | 1 | ? | ? |
| 0 | 0 | 0 | 0 | - | 0 | 0 | - | ? | 0 | 0 | ? |
| 0 | ? | ? | ? | 0 | 0 | ? | ? | ? | 0 | 1 | 1 |
| 1 | 1 | 0 | 2 | 2 | 0 | 0 | 0 | ? | ? | ? | ? |
| 0 | 5 | 1 | - | ? | ? | ? | ? | ? | 0 | 0 | ? |
| 0 | 0 | 0 |   |   |   |   |   |   |   |   |   |

†*Neosemionotus puntanus*

|   |   |     |   |   |   |   |   |   |   |   |   |
|---|---|-----|---|---|---|---|---|---|---|---|---|
| 0 | 0 | 1   | 0 | - | 0 | ? | ? | ? | 0 | 1 | 1 |
| ? | ? | ?   | ? | 0 | ? | ? | ? | ? | ? | ? | ? |
| ? | ? | ?   | ? | ? | ? | ? | ? | ? | ? | ? | ? |
| ? | ? | ?   | ? | 0 | 0 | ? | ? | ? | ? | 1 | 0 |
| ? | ? | ?   | ? | ? | ? | ? | ? | ? | 1 | 0 | ? |
| ? | ? | ?   | 0 | 0 | ? | ? | ? | ? | 0 | 0 | 1 |
| - | ? | 0   | ? | ? | ? | ? | ? | 3 | ? | ? | ? |
| ? | 0 | 0   | ? | 3 | 2 | 0 | 0 | 4 | 0 | 0 | ? |
| ? | 0 | 0   | 0 | 0 | 0 | 0 | 0 | ? | 5 | 1 | 0 |
| ? | 1 | ?   | 0 | 0 | 1 | 2 | 0 | 1 | 0 | 4 | 0 |
| ? | 0 | 1   | 1 | 4 | 0 | 2 | 0 | 0 | 1 | 1 | 1 |
| 1 | 0 | 0   | 3 | 1 | 0 | 0 | 1 | ? | 1 | 0 | 2 |
| 0 | 0 | 0&1 | 0 | 0 | 0 | 0 | 1 | 2 | 0 | 1 | 1 |
| 2 | 1 | 0   | 0 | 0 | ? | ? | ? | ? | 1 | 0 | 1 |
| ? | 1 | ?   | ? | ? | ? | ? | ? | ? | 0 | 0 | 0 |
| 0 | 0 | 0   | 0 | ? | 0 | 2 | 0 | 0 | - | 0 | 0 |
| - | 0 | 0   | 0 | 0 | 0 | 4 | 1 | 1 | ? | 1 | 1 |
| 1 | ? | 3   | 0 | - | ? | ? | ? | ? | ? | ? | 0 |
| 0 | 0 | 0   | ? | ? | 0 | 0 | ? | ? | ? | ? | ? |
| ? | ? | ?   | ? | ? | ? | ? | ? | ? | ? | ? | ? |
| ? | ? | ?   | ? | ? | ? | ? | ? | ? | ? | ? | ? |

|   |   |   |   |   |   |   |   |   |   |   |   |   |
|---|---|---|---|---|---|---|---|---|---|---|---|---|
| ? | ? | ? | ? | ? | ? | ? | ? | ? | ? | ? | ? | ? |
| ? | ? | ? | ? | ? | ? | ? | ? | ? | ? | ? | ? | ? |
| ? | 2 | ? | ? | ? | 1 | 2 | 0 | ? | ? | 1 | ? | ? |
| 0 | 0 | 0 | 0 | 1 | 0 | 0 | 0 | - | ? | 0 | 1 | 1 |
| 0 | 0 | ? | 1 | 1 | 0 | 0 | 0 | ? | ? | ? | 1 | 2 |
| 2 | 2 | 1 | 2 | 1 | 1 | 0 | 0 | ? | 1 | 1 | 2 | 1 |
| ? | ? | 1 | - | ? | ? | ? | ? | ? | ? | 1 | 0 | ? |
| 0 | 0 | 0 |   |   |   |   |   |   |   |   |   |   |

†*Notagopus denticulatos*

|   |   |   |   |   |   |   |   |   |   |   |   |   |
|---|---|---|---|---|---|---|---|---|---|---|---|---|
| 3 | 0 | 1 | 0 | - | 1 | 0 | 0 | - | 0 | 0 | 0 | - |
| ? | ? | ? | ? | 0 | ? | ? | ? | ? | ? | ? | ? | ? |
| ? | ? | ? | ? | ? | ? | ? | ? | ? | ? | ? | ? | ? |
| ? | ? | ? | ? | ? | 0 | ? | ? | ? | ? | 1 | ? | ? |
| ? | ? | ? | ? | ? | ? | ? | ? | ? | ? | ? | ? | ? |
| ? | ? | ? | 0 | 0 | ? | ? | ? | ? | ? | ? | ? | ? |
| ? | ? | ? | ? | ? | ? | ? | ? | ? | ? | ? | ? | ? |
| ? | ? | ? | ? | ? | 0 | ? | ? | ? | ? | - | 0 | ? |
| ? | 0 | ? | 2 | 1 | 3 | 0 | 1 | ? | ? | ? | ? | ? |
| ? | 1 | 1 | 0 | 0 | ? | ? | ? | ? | ? | ? | ? | 0 |
| 0 | ? | 0 | ? | ? | 0 | 4 | - | ? | ? | 1 | ? | ? |
| 0 | 0 | 0 | 5 | 1 | 0 | 0 | ? | ? | ? | ? | 1 | - |
| - | - | - | - | - | - | 0 | ? | ? | ? | 0 | 1 | 1 |
| 4 | 1 | 2 | 0 | 0 | ? | 0 | - | - | 0 | 0 | 0 | 1 |
| ? | 1 | ? | ? | ? | ? | ? | ? | 0 | ? | ? | 0 | 0 |
| 0 | 0 | 0 | 0 | ? | ? | 2 | 0 | 0 | - | 0 | 0 | 0 |
| - | 0 | 1 | 1 | 0 | 0 | 4 | 1 | ? | ? | ? | 1 | 1 |
| 1 | 1 | 3 | 0 | - | ? | ? | ? | ? | ? | ? | ? | ? |
| ? | ? | ? | ? | ? | ? | ? | ? | ? | ? | ? | ? | ? |
| ? | ? | ? | ? | ? | ? | ? | ? | ? | ? | ? | ? | ? |
| ? | ? | ? | ? | ? | ? | ? | ? | ? | ? | ? | ? | ? |
| ? | ? | ? | ? | ? | ? | ? | ? | ? | ? | ? | ? | ? |
| ? | ? | ? | ? | ? | ? | ? | ? | ? | ? | ? | ? | ? |
| ? | ? | ? | ? | ? | ? | ? | ? | ? | ? | ? | ? | ? |
| ? | 0 | ? | ? | ? | 3 | 2 | 1 | ? | ? | 1 | ? | ? |
| ? | 0 | 0 | 0 | ? | 0 | ? | - | ? | ? | 0 | ? | 1 |
| 1 | 3 | ? | ? | ? | 0 | 2 | ? | ? | ? | ? | 1 | 3 |
| ? | ? | ? | ? | ? | ? | ? | ? | ? | ? | ? | ? | ? |
| ? | ? | ? | ? | ? | ? | ? | ? | ? | ? | ? | ? | ? |
| ? | ? | ? | ? | ? | ? | 1 | ? | ? | ? | ? | 0 | ? |
| ? | 0 | 0 |   |   |   |   |   |   |   |   |   |   |

†*Notelops brama*

|   |   |   |   |     |   |   |   |   |   |   |   |   |
|---|---|---|---|-----|---|---|---|---|---|---|---|---|
| 2 | 0 | 1 | 2 | 0&1 | - | - | - | - | 0 | - | - | - |
| 1 | 0 | 3 | ? | 1   | 1 | 0 | 0 | 1 | 0 | 3 | 2 |   |
| 0 | ? | ? | 0 | ?   | 1 | 1 | 2 | 0 | 1 | 1 | 1 |   |
| 0 | 0 | 4 | 1 | 0   | 0 | 0 | 0 | 0 | 1 | 0 | 1 | 1 |
| ? | 2 | 0 | 0 | 0   | 1 | - | ? | ? | ? | 1 | 1 | 0 |
| 1 | 2 | 0 | 0 | 0   | 0 | 0 | 0 | 0 | 0 | 0 | 1 | - |
| ? | 2 | 1 | ? | ?   | ? | ? | 1 | ? | 4 | 1 | 0 | ? |
| 0 | 0 | 0 | 0 | 3   | 0 | 2 | 0 | 0 | 1 | 1 | 1 | - |
| 0 | 0 | 0 | 2 | 1   | 1 | 0 | 0 | 0 | 0 | 2 | 2 | 1 |
| 3 | 1 | ? | 0 | 0   | 1 | 3 | - | 0 | 0 | 0 | 2 | 0 |
| 0 | 0 | 2 | 0 | 1   | 1 | - | 0 | 0 | 0 | 0 | - | - |
| - | 0 | 1 | - | -   | - | - | - | 3 | - | 1 | 1 | - |



|   |   |   |   |   |   |   |   |   |   |   |   |
|---|---|---|---|---|---|---|---|---|---|---|---|
| - | - | - | - | - | - | 0 | - | - | 0 | 1 | 0 |
| 0 | 2 | 0 | 1 | 0 | 1 | 1 | 1 | 0 | 1 | 0 | 1 |
| 4 | 0 | 1 | 1 | 1 | 1 | 0 | 1 | 0 | 2 | 1 | 0 |
| 0 | 2 | 0 | 0 | - | ? | 3 | 0 | 0 | 0 | 0 | 0 |
| - | 0 | 0 | 0 | 0 | 0 | 4 | ? | ? | ? | 0 | 1 |
| 0 | 0 | ? | 1 | ? | ? | ? | ? | ? | 0 | - | 1 |
| 3 | 0 | 0 | 0 | 0 | 0 | 0 | 0 | 1 | 1 | 1 | 0 |
| - | 1 | 0 | 0 | 1 | 0 | 1 | ? | 1 | 1 | ? | 1 |
| 0 | - | 1 | 0 | 0 | 0 | 1 | 0 | 0 | 1 | 0 | 0 |
| 0 | 0 | 0 | 1 | 0 | 1 | 2 | 1 | 0 | 1 | 4 | 4 |
| 1 | 2 | 0 | 2 | 2 | 3 | 0 | 0 | 1 | 2 | 1 | 2 |
| 1 | 0 | 0 | ? | 1 | 2 | 3 | ? | 4 | 2 | ? | ? |
| ? | 2 | ? | ? | - | 2 | 0 | 1 | ? | 2 | - | 1 |
| 0 | 0 | ? | ? | 0 | 0 | 0 | 0 | ? | 0 | 1 | 3 |
| 3 | ? | 1 | - | 1 | 0 | 0 | 0 | 0 | 1 | 0 | 0 |
| 0 | 2 | 1 | - | 0 | 0 | ? | 1 | ? | 1 | ? | 2 |
| 1 | 0 | 0 |   |   |   |   |   |   |   |   |   |

†*Obaichthys decoratus*

|   |   |   |   |   |   |   |   |   |   |   |   |
|---|---|---|---|---|---|---|---|---|---|---|---|
| 1 | 1 | 2 | 0 | - | 1 | 0 | 1 | 1 | 0 | 0 | - |
| ? | - | - | ? | 0 | ? | ? | 0 | ? | ? | ? | 2 |
| 1 | 0 | - | 2 | 0 | 0 | - | 1 | ? | ? | ? | 1 |
| 1 | 0 | ? | 1 | - | 1 | 1 | 0 | 0 | 1 | 1 | 0 |
| ? | 2 | 1 | 1 | - | - | 1 | 1 | 0 | 1 | ? | ? |
| ? | 3 | 0 | 1 | 0 | ? | 1 | 0 | 4 | 0 | 0 | 1 |
| - | 0 | 0 | ? | 1 | 1 | 0 | 0 | 1 | ? | 0 | 3 |
| ? | 0 | 0 | 0 | 2 | 2 | 0 | 0 | 4 | 0 | 0 | 0 |
| 1 | 0 | 0 | 0 | 1 | 1 | 0 | 1 | 0 | ? | ? | ? |
| ? | 1 | 1 | 0 | 0 | 1 | ? | 0 | 0 | - | 3 | 1 |
| 0 | 0 | 1 | 1 | 7 | 0 | 0 | 0 | 0 | 1 | 5 | - |
| 1 | 0 | ? | ? | ? | ? | 0 | ? | ? | ? | 0 | 1 |
| 0 | 0 | 0 | 0 | - | 0 | 0 | 1 | 2 | 0 | 1 | 2 |
| 4 | 1 | 0 | 0 | 0 | 1 | ? | ? | ? | 0 | 0 | 1 |
| 2 | 1 | 1 | 0 | 0 | 1 | 1 | 0 | 0 | 0 | ? | 0 |
| 0 | 0 | 1 | 0 | 0 | ? | 3 | 0 | 1 | 1 | 0 | 0 |
| - | 0 | 0 | 0 | 0 | 1 | 3 | 1 | 1 | 2 | 1 | 1 |
| 1 | 0 | 4 | 0 | - | ? | ? | ? | ? | ? | ? | ? |
| ? | ? | ? | ? | ? | 1 | 0 | 1 | 2 | 0 | 0 | 0 |
| 0 | - | 2 | ? | ? | 1 | ? | ? | 1 | ? | ? | 0 |
| 0 | - | ? | ? | ? | ? | ? | ? | ? | ? | ? | ? |
| ? | ? | ? | ? | ? | ? | 1 | 0 | 0 | ? | ? | ? |
| ? | ? | ? | ? | ? | ? | ? | ? | ? | ? | ? | ? |
| - | ? | ? | ? | ? | 3 | 2 | ? | ? | 1 | ? | ? |
| 0 | 0 | 0 | 0 | ? | ? | ? | ? | ? | 0 | 0 | ? |
| 0 | ? | ? | ? | ? | 0 | ? | ? | ? | ? | 1 | 1 |
| 1 | 0 | 0 | 2 | 2 | 0 | 0 | 0 | 1 | ? | - | ? |
| - | ? | ? | ? | 0 | ? | 0 | ? | ? | 0 | 0 | ? |
| 0 | 0 | 0 |   |   |   |   |   |   |   |   |   |

†*Occitanichthys canjuersensis*

|   |   |   |   |   |   |   |   |   |   |   |   |
|---|---|---|---|---|---|---|---|---|---|---|---|
| 0 | 0 | 0 | 0 | - | 1 | 0 | 1 | 2 | 0 | 1 | 0 |
| ? | ? | ? | ? | 0 | ? | ? | ? | ? | ? | ? | ? |
| ? | ? | ? | ? | ? | ? | ? | ? | ? | ? | ? | ? |

|   |   |   |   |   |   |   |   |   |   |   |   |
|---|---|---|---|---|---|---|---|---|---|---|---|
| ? | ? | ? | ? | 1 | 0 | 0 | 0 | 0 | 0 | 1 | 0 |
| ? | ? | ? | ? | ? | ? | ? | ? | ? | ? | ? | ? |
| ? | 1 | 0 | 0 | 0 | ? | 0 | 0 | 3 | 0 | 0 | 1 |
| - | 0 | ? | ? | ? | ? | ? | ? | 3 | 1 | 0 | ? |
| ? | ? | ? | ? | ? | 0 | 0 | 0 | 4 | - | 0 | ? |
| ? | 0 | 0 | 0 | 0 | 1 | 0 | 1 | 0 | 5 | 1 | 0 |
| 3 | 1 | 1 | 0 | 0 | ? | 1 | 0 | 0 | 0 | 3 | 0 |
| 0 | 0 | 0 | 1 | - | 0 | 0 | 0 | 0 | 1 | 4 | 2 |
| 0 | 0 | ? | ? | ? | ? | 0 | ? | ? | ? | 0 | 2 |
| 0 | 0 | 0 | 0 | 0 | 0 | 0 | 1 | 1 | 0 | 1 | 1 |
| 4 | 3 | 0 | 0 | 0 | 1 | 1 | 0 | 0 | 1 | 0 | 1 |
| 0 | 1 | ? | 0 | 0 | 1 | 1 | ? | 0 | ? | ? | ? |
| 0 | 0 | 0 | 2 | 2 | 2 | 2 | 0 | 1 | - | 0 | 0 |
| - | 0 | 0 | 0 | 0 | 0 | 1 | 1 | 1 | 3 | 1 | 1 |
| 0 | 1 | 3 | 0 | - | ? | ? | ? | ? | 1 | 1 | 0 |
| ? | 0 | ? | 0 | ? | 0 | 0 | ? | ? | ? | ? | ? |
| ? | ? | ? | 0 | ? | ? | ? | ? | ? | ? | ? | ? |
| ? | ? | ? | ? | ? | ? | ? | ? | ? | ? | ? | ? |
| ? | ? | ? | ? | ? | ? | ? | ? | ? | ? | ? | ? |
| ? | ? | ? | ? | ? | ? | ? | ? | ? | ? | ? | ? |
| ? | ? | ? | ? | ? | ? | ? | ? | ? | ? | ? | ? |
| ? | ? | ? | ? | ? | 3 | ? | 1 | ? | 2 | ? | ? |
| 0 | 1 | 0 | 0 | ? | 0 | 0 | - | ? | 0 | 0 | 1 |
| 0 | ? | ? | ? | 0 | 0 | ? | ? | 1 | ? | 1 | 2 |
| 0 | ? | 0 | 2 | 1 | 1 | 0 | 0 | 1 | 0 | 2 | 1 |
| 1 | 4 | ? | ? | ? | ? | 0 | ? | ? | 0 | 0 | ? |
| 0 | 0 | 0 |   |   |   |   |   |   |   |   |   |

†*Ophiopsiella attenuata*

|   |   |   |   |   |   |   |   |   |   |   |   |
|---|---|---|---|---|---|---|---|---|---|---|---|
| 3 | 0 | 1 | 0 | - | 1 | 0 | 0 | - | 1 | 0 | - |
| ? | ? | ? | ? | 0 | ? | ? | ? | ? | ? | ? | ? |
| 0 | ? | ? | ? | ? | ? | ? | ? | ? | ? | ? | ? |
| ? | ? | ? | 1 | 1 | 0 | ? | 0 | 0 | ? | 1 | 0 |
| ? | ? | ? | ? | ? | ? | ? | ? | ? | ? | ? | ? |
| ? | ? | ? | 0 | 0 | ? | ? | ? | 0 | 1 | - | - |
| 0 | ? | 0 | ? | ? | ? | ? | ? | 2 | 1 | 1 | 0 |
| ? | ? | ? | ? | ? | 0 | 0 | 0 | 4 | 0 | - | ? |
| ? | 0 | 1 | 2 | 1 | 0 | 0 | 1 | 0 | 3 | 1 | 0 |
| 3 | 1 | ? | 0 | 0 | 1 | 1 | 0 | 2 | 0 | 3 | 1 |
| 0 | 1 | 5 | 0 | 8 | 0 | 3 | 0 | 2 | 0 | - | - |
| - | 0 | 0 | 3 | 1 | 0 | 0 | 1 | 4 | 1 | 0 | 3 |
| 0 | 2 | 0 | 0 | 0 | 0 | 0 | 1 | 0 | 0 | 1 | 1 |
| 1 | 1 | 0 | 1 | 0 | 3 | 1 | 0 | 0 | 1 | 0 | 1 |
| 0 | 1 | ? | 0 | ? | 1 | 0 | 0 | 0 | 0 | 0 | 0 |
| 0 | 0 | 0 | 0 | 0 | 0 | 2 | 0 | 0 | - | 0 | 0 |
| - | 0 | 0 | 0 | 0 | 1 | 1 | 1 | 1 | 1 | 1 | 1 |
| 0 | 1 | 2 | 1 | ? | ? | ? | ? | ? | 1 | 1 | 0 |
| 2 | 0 | 1 | 1 | 1 | 0 | 1 | - | 2 | 0 | 0 | ? |
| 2 | - | ? | ? | ? | ? | ? | ? | 1 | ? | ? | ? |
| ? | ? | ? | ? | ? | ? | ? | ? | ? | ? | ? | ? |
| ? | ? | ? | ? | ? | ? | ? | ? | ? | ? | ? | ? |
| ? | ? | ? | ? | ? | ? | ? | ? | ? | ? | ? | ? |
| ? | ? | ? | ? | ? | ? | ? | ? | ? | ? | ? | ? |
| ? | 0 | ? | ? | ? | 3 | 3 | 2 | ? | 0 | ? | ? |

|                                    |   |   |   |   |   |   |   |   |   |   |   |
|------------------------------------|---|---|---|---|---|---|---|---|---|---|---|
| 0                                  | 3 | 0 | 1 | 2 | 0 | ? | - | ? | 0 | 0 | ? |
| 1                                  | 1 | ? | ? | 1 | 0 | ? | ? | ? | ? | 1 | 0 |
| 0                                  | 0 | 0 | 0 | 0 | 0 | 0 | 1 | 1 | 0 | 1 | 0 |
| 1                                  | 3 | ? | ? | 0 | ? | 0 | 0 | 0 | 0 | 0 | ? |
| 0                                  | 0 | 0 |   |   |   |   |   |   |   |   |   |
| † <i>Ophiopsis muensteri</i>       |   |   |   |   |   |   |   |   |   |   |   |
| 0                                  | 0 | 0 | 0 | - | 1 | 0 | 1 | 0 | 1 | 0 | - |
| ?                                  | ? | ? | ? | 0 | ? | ? | ? | ? | ? | ? | ? |
| ?                                  | ? | ? | ? | ? | ? | ? | ? | ? | ? | ? | ? |
| ?                                  | ? | ? | 1 | ? | 0 | ? | ? | ? | ? | 1 | 0 |
| ?                                  | ? | ? | ? | ? | ? | ? | ? | ? | ? | 1 | 0 |
| ?                                  | ? | 1 | 0 | 0 | 0 | ? | ? | ? | 0 | ? | ? |
| ?                                  | ? | ? | ? | ? | ? | ? | ? | ? | ? | 1 | 1 |
| ?                                  | ? | ? | 0 | ? | 0 | 0 | 0 | 4 | 0 | 0 | ? |
| ?                                  | 0 | ? | 2 | 1 | 1 | 0 | 1 | 0 | 5 | 1 | 0 |
| 3                                  | 1 | ? | 0 | 0 | 1 | 0 | 0 | 2 | 0 | 3 | 0 |
| 0                                  | 0 | 0 | 0 | 8 | 0 | 3 | 0 | 2 | 0 | - | - |
| -                                  | 0 | 0 | 2 | 1 | 0 | 1 | 1 | 4 | 1 | 0 | 1 |
| 0                                  | 0 | 0 | 0 | - | 0 | 0 | ? | 0 | 0 | 1 | 1 |
| 1                                  | 1 | 0 | 1 | 1 | 2 | 1 | 0 | 0 | 1 | 0 | 1 |
| ?                                  | 1 | ? | 0 | 0 | 1 | ? | 0 | 0 | 0 | 0 | 0 |
| 0                                  | 0 | 0 | 0 | ? | 0 | 2 | 0 | 0 | - | 0 | 0 |
| -                                  | 0 | 1 | 0 | 0 | 1 | 1 | 1 | 1 | ? | 1 | 1 |
| 0                                  | 1 | 2 | 1 | ? | ? | ? | ? | ? | ? | ? | ? |
| 2                                  | 0 | 1 | 1 | 1 | 0 | 0 | ? | ? | ? | ? | ? |
| ?                                  | ? | 0 | ? | ? | ? | ? | ? | ? | ? | ? | ? |
| ?                                  | ? | ? | ? | ? | ? | ? | ? | ? | ? | ? | ? |
| ?                                  | ? | ? | ? | ? | ? | ? | ? | ? | ? | ? | ? |
| ?                                  | ? | ? | ? | ? | ? | ? | ? | ? | ? | ? | ? |
| ?                                  | ? | ? | ? | ? | ? | ? | ? | ? | ? | ? | ? |
| ?                                  | 0 | ? | ? | ? | 3 | 3 | 1 | ? | 0 | 0 | 0 |
| 0                                  | 2 | 0 | 0 | 2 | 0 | 0 | - | ? | 0 | 0 | 1 |
| 0                                  | 0 | ? | ? | 1 | 0 | 0 | ? | ? | ? | 1 | 0 |
| 0                                  | 0 | 0 | 0 | 1 | 0 | 0 | 0 | 0 | 0 | 1 | 0 |
| 1                                  | 3 | ? | ? | 0 | ? | 0 | 0 | 0 | 1 | 0 | 0 |
| 0                                  | 0 | 0 |   |   |   |   |   |   |   |   |   |
| † <i>Orthogonikleithrus hoelli</i> |   |   |   |   |   |   |   |   |   |   |   |
| 2                                  | 0 | 1 | 2 | ? | - | - | - | - | ? | - | - |
| ?                                  | ? | ? | ? | 1 | ? | ? | ? | ? | ? | ? | ? |
| ?                                  | ? | ? | ? | ? | ? | ? | ? | ? | ? | ? | ? |
| 0                                  | ? | 5 | 1 | 0 | 0 | 0 | 0 | 0 | 0 | 1 | 2 |
| ?                                  | 1 | ? | 0 | ? | 1 | ? | 0 | - | 1 | 1 | ? |
| ?                                  | ? | ? | 0 | 0 | ? | 0 | 0 | 2 | 0 | 1 | - |
| 1                                  | 0 | 1 | ? | ? | ? | 1 | ? | 4 | 1 | 0 | 2 |
| 0                                  | 0 | ? | 0 | 3 | ? | ? | 0 | ? | ? | ? | ? |
| ?                                  | 0 | ? | 2 | 1 | 1 | 0 | 0 | 0 | ? | ? | ? |
| ?                                  | ? | 0 | 0 | 0 | 0 | 3 | 0 | 0 | 0 | ? | ? |
| 0                                  | 0 | ? | ? | ? | ? | 0 | 0 | 0 | 0 | - | - |
| -                                  | 0 | ? | ? | ? | - | ? | 4 | - | 1 | 1 | - |
| -                                  | - | - | - | - | - | 0 | - | - | 0 | 1 | 0 |
| 2                                  | 1 | 1 | 0 | 0 | 2 | 2 | - | 0 | 0 | 0 | 1 |
| 1&4                                | 0 | 3 | 0 | 1 | 1 | ? | 1 | 0 | - | - | 0 |

|                                   |   |   |   |   |   |     |   |   |   |   |   |   |
|-----------------------------------|---|---|---|---|---|-----|---|---|---|---|---|---|
| 1                                 | - | - | - | - | ? | 3   | 0 | 0 | 0 | 0 | 0 | 0 |
| -                                 | 0 | 0 | 0 | 0 | 2 | 4   | 1 | 2 | 0 | 1 | 1 | 1 |
| 0                                 | 0 | 2 | 0 | - | ? | ?   | ? | ? | ? | ? | ? | ? |
| ?                                 | ? | ? | 0 | 0 | 0 | ?   | 0 | 1 | 1 | 1 | 1 | 0 |
| -                                 | 1 | 0 | 0 | 1 | 0 | 0   | 1 | 1 | 1 | 1 | 0 | 1 |
| 1                                 | ? | 1 | 2 | 2 | 0 | 0&1 | 0 | 0 | 1 | 1 | 1 | 0 |
| 0                                 | 0 | 0 | 1 | 0 | 0 | 2   | 1 | 0 | 0 | ? | ? | 3 |
| 1                                 | 1 | 0 | 2 | 1 | 0 | 0   | 1 | 1 | 2 | ? | ? | 1 |
| 2                                 | 0 | 0 | 1 | 1 | 2 | 3   | ? | 4 | 2 | 1 | 1 | 1 |
| 0                                 | 2 | 1 | 0 | - | 2 | 1   | 1 | 1 | 2 | - | - | 1 |
| 0                                 | 0 | 1 | 1 | 1 | 0 | ?   | 0 | ? | ? | ? | 1 | 3 |
| 3                                 | 0 | 1 | - | 0 | ? | 1   | 0 | 0 | 1 | 3 | 1 | 1 |
| 0                                 | ? | 1 | - | 0 | 0 | 1   | 1 | ? | 1 | ? | ? | 2 |
| 1                                 | 0 | ? |   |   |   |     |   |   |   |   |   |   |
| † <i>Oshunia brevis</i>           |   |   |   |   |   |     |   |   |   |   |   |   |
| 0                                 | 0 | 1 | 1 | - | - | -   | - | - | ? | - | - | - |
| 1                                 | 1 | 0 | ? | 0 | - | -   | 1 | 1 | 0 | 1 | 1 | 2 |
| 0                                 | 1 | 0 | 0 | ? | ? | ?   | ? | 0 | 1 | 2 | 0 | 0 |
| 1                                 | 0 | 0 | ? | 1 | 0 | 0   | 0 | 0 | 0 | ? | ? | ? |
| 1                                 | 2 | 0 | 0 | 0 | 0 | -   | 1 | 1 | 1 | 0 | ? | ? |
| ?                                 | ? | ? | 0 | 0 | 0 | ?   | ? | 0 | 1 | - | - | - |
| ?                                 | ? | ? | ? | ? | ? | 0   | ? | ? | 1 | 1 | 0 | 0 |
| ?                                 | ? | ? | ? | ? | 0 | 0   | 0 | ? | ? | 0 | 1 | 0 |
| 2                                 | 0 | 0 | 2 | 1 | 1 | 0   | 0 | 0 | 6 | 2 | 1 | 1 |
| ?                                 | 1 | ? | 0 | 1 | - | -   | - | - | - | 3 | 0 | 0 |
| 0                                 | 1 | ? | ? | ? | ? | ?   | 1 | ? | ? | ? | ? | ? |
| ?                                 | ? | ? | ? | ? | ? | ?   | ? | ? | ? | 0 | ? | ? |
| ?                                 | ? | ? | ? | ? | ? | ?   | ? | ? | 0 | 1 | 1 | 1 |
| 1                                 | 1 | 0 | ? | ? | ? | ?   | ? | ? | ? | ? | ? | ? |
| ?                                 | ? | ? | ? | ? | ? | ?   | ? | ? | ? | ? | ? | 0 |
| ?                                 | ? | ? | ? | ? | ? | ?   | ? | ? | ? | 0 | 0 | 0 |
| -                                 | ? | 0 | ? | ? | 0 | ?   | 1 | ? | ? | ? | ? | ? |
| ?                                 | ? | ? | 1 | ? | ? | ?   | ? | ? | ? | ? | ? | ? |
| ?                                 | 0 | ? | 1 | ? | 0 | ?   | 0 | 2 | 0 | 0 | 0 | 0 |
| 0                                 | - | 1 | ? | ? | 0 | 0   | ? | 1 | 0 | ? | ? | 0 |
| 0                                 | - | 0 | 0 | 0 | 0 | ?   | 0 | 0 | 0 | 0 | 0 | ? |
| ?                                 | ? | ? | ? | ? | 0 | 0   | 0 | 1 | ? | 0 | ? | ? |
| ?                                 | - | ? | 0 | 0 | 0 | 0   | 0 | 0 | - | - | - | - |
| -                                 | 0 | 0 | 0 | ? | 1 | ?   | ? | ? | ? | ? | ? | ? |
| ?                                 | ? | ? | ? | ? | 1 | ?   | ? | ? | 0 | 0 | 1 | ? |
| 1                                 | ? | ? | ? | ? | 0 | ?   | ? | ? | ? | 1 | ? | ? |
| ?                                 | ? | ? | ? | 0 | 1 | 0   | ? | 1 | ? | 2 | ? | ? |
| ?                                 | ? | ? | ? | ? | ? | ?   | ? | ? | ? | 0 | 0 | 0 |
| ?                                 | 0 | 0 |   |   |   |     |   |   |   |   |   |   |
| † <i>Pachyamia latimaxillaris</i> |   |   |   |   |   |     |   |   |   |   |   |   |
| 3                                 | 0 | 0 | 1 | - | - | -   | - | - | ? | - | - | - |
| ?                                 | ? | ? | ? | 0 | ? | ?   | ? | ? | ? | ? | ? | ? |
| 1                                 | ? | ? | ? | ? | ? | ?   | 1 | ? | ? | ? | ? | ? |
| 1                                 | ? | ? | ? | ? | 0 | ?   | ? | ? | ? | ? | ? | ? |
| ?                                 | 2 | ? | ? | ? | ? | ?   | ? | ? | ? | ? | ? | ? |
| 0                                 | ? | 1 | 0 | 0 | 0 | 0   | ? | 0 | 1 | - | - | - |

|   |   |   |   |   |   |   |   |   |   |   |   |
|---|---|---|---|---|---|---|---|---|---|---|---|
| 0 | ? | ? | ? | ? | ? | 0 | ? | 2 | 1 | 1 | 0 |
| ? | ? | ? | ? | ? | ? | 0 | 0 | 0 | 0 | 0 | 0 |
| ? | 0 | 0 | 2 | 1 | 0 | 1 | 0 | 1 | 0 | 0 | 0 |
| ? | 1 | ? | 0 | 0 | ? | ? | 0 | 0 | 0 | 1 | 1 |
| 0 | 1 | 3 | 0 | 2 | 0 | 2 | 0 | 0 | 0 | - | - |
| - | 0 | 0 | 2 | 1 | 0 | ? | 1 | ? | 1 | 1 | - |
| - | - | - | - | - | - | 0 | ? | ? | 0 | 1 | 1 |
| 0 | 1 | 0 | 1 | 2 | 1 | 1 | 1 | 0 | 0 | 0 | 1 |
| 0 | 1 | ? | 0 | ? | 1 | 0 | 0 | 0 | 0 | 0 | 0 |
| 0 | ? | 0 | 4 | 0 | 0 | 2 | 0 | 0 | - | 0 | 0 |
| - | 0 | 0 | 0 | 0 | 3 | 2 | 1 | ? | ? | 1 | 1 |
| 1 | 1 | 1 | 1 | 0 | ? | 1 | ? | ? | ? | ? | ? |
| ? | ? | ? | 0 | ? | ? | ? | 0 | 2 | 0 | 0 | 1 |
| 2 | - | 0 | 1 | 0 | 0 | 0 | 1 | ? | ? | ? | 0 |
| 0 | - | 0 | 0 | 0 | 0 | ? | 0 | 0 | 1 | 1 | 0 |
| 0 | 0 | ? | ? | 0 | 0 | ? | 0 | 0 | ? | 4 | 3 |
| ? | ? | 1 | ? | 0 | 0 | 0 | 0 | 0 | - | - | - |
| - | ? | ? | ? | ? | ? | ? | ? | ? | ? | ? | ? |
| ? | ? | ? | ? | ? | ? | ? | ? | ? | ? | ? | 1 |
| 1 | ? | ? | ? | ? | 0 | ? | ? | ? | ? | 1 | 3 |
| ? | ? | ? | ? | 0 | 0 | 1 | ? | 0 | ? | 1 | 0 |
| ? | ? | ? | ? | 0 | ? | 0 | ? | ? | ? | 0 | 1 |
| 1 | 0 | 0 |   |   |   |   |   |   |   |   |   |

†*Pachyamia mexicana*

|   |   |   |   |   |   |   |   |   |   |   |   |
|---|---|---|---|---|---|---|---|---|---|---|---|
| 3 | 0 | 0 | 1 | - | - | - | - | - | ? | - | - |
| ? | ? | ? | ? | 0 | ? | ? | ? | ? | ? | ? | ? |
| 1 | ? | ? | ? | ? | ? | ? | ? | ? | ? | ? | ? |
| ? | ? | ? | ? | 1 | 0 | ? | ? | ? | ? | ? | ? |
| ? | 2 | ? | ? | ? | ? | ? | ? | ? | 1 | 0 | ? |
| 0 | ? | 1 | 0 | 0 | ? | 0 | ? | 0 | 1 | - | - |
| 0 | ? | ? | ? | ? | ? | ? | ? | ? | 1 | 1 | 0 |
| ? | ? | ? | ? | ? | 0 | 0 | 0 | 0 | 0 | 0 | ? |
| ? | 0 | 0 | 2 | 1 | 0 | 1 | 0 | 1 | 0 | 0 | 0 |
| 2 | 1 | 0 | 0 | 0 | ? | ? | ? | ? | 0 | 0 | 1 |
| 0 | 1 | ? | 0 | 2 | 0 | 2 | 0 | 0 | 0 | - | - |
| - | 0 | 0 | 2 | 1 | 0 | 1 | 1 | 4 | 1 | 1 | - |
| - | - | - | - | - | - | 0 | ? | ? | 0 | 1 | 1 |
| 0 | 0 | 1 | 0 | 2 | 1 | 1 | 1 | 0 | 0 | 0 | 1 |
| 0 | 1 | 2 | 0 | 0 | 1 | 0 | 0 | 0 | 0 | 0 | 0 |
| 0 | 0 | 0 | 4 | 0 | 0 | 2 | 0 | 0 | - | 0 | 0 |
| - | 0 | 0 | 0 | 0 | 3 | 2 | 1 | ? | 1 | 1 | 1 |
| 1 | 1 | 1 | 1 | 0 | ? | 1 | ? | ? | ? | ? | ? |
| 3 | ? | ? | 0 | ? | 0 | 0 | 0 | 2 | 0 | 0 | 1 |
| 2 | - | 0 | 1 | 0 | 0 | 0 | 1 | ? | ? | ? | 0 |
| 0 | - | 0 | 0 | 0 | 0 | 0 | 0 | 0 | 1 | 1 | 0 |
| 0 | 0 | 0 | 0 | 0 | 0 | 0 | 0 | 0 | ? | 4 | 2 |
| 1 | 3 | 1 | 0 | 0 | 0 | 0 | 0 | 0 | - | - | - |
| - | 1 | 1 | 0 | 0 | 3 | 0 | ? | 3 | 0 | 0 | 0 |
| 0 | 2 | 1 | 0 | - | 1 | 0 | 2 | ? | 2 | - | 1 |
| 1 | ? | 0 | 1 | 1 | 0 | ? | ? | ? | ? | 1 | ? |
| 3 | 0 | 1 | - | 0 | 0 | 1 | 0 | 0 | ? | 1 | 0 |

|                                   |   |     |   |   |   |   |   |   |   |   |     |
|-----------------------------------|---|-----|---|---|---|---|---|---|---|---|-----|
| ?                                 | ? | ?   | ? | 0 | ? | 0 | 0 | ? | 1 | 0 | 1   |
| 1                                 | 0 | 0   |   |   |   |   |   |   |   |   |     |
| † <i>Pachycormus macropterus</i>  |   |     |   |   |   |   |   |   |   |   |     |
| 0                                 | 0 | 1   | ? | - | - | - | - | - | 0 | - | -   |
| 1                                 | 0 | 0   | ? | 0 | - | - | 0 | ? | ? | 5 | 3   |
| ?                                 | 0 | -   | ? | 0 | 1 | 0 | 1 | 0 | 1 | 0 | 0   |
| 0                                 | 0 | 2   | 1 | 0 | 0 | 0 | 0 | 1 | 0 | 1 | 1   |
| 1                                 | 1 | 0   | 0 | 2 | 1 | - | 1 | 1 | 1 | 0 | ?   |
| 0                                 | 1 | 1   | 0 | 0 | 0 | 0 | 1 | 0 | ? | ? | ?   |
| 0                                 | 0 | 0   | 0 | ? | ? | 0 | ? | 2 | 1 | 0 | 1   |
| 1                                 | 0 | 1   | 0 | 2 | - | - | - | - | 1 | - | ?   |
| 0                                 | 1 | 0   | 2 | 0 | 0 | 0 | 0 | 0 | 0 | 2 | 0   |
| ?                                 | 1 | 0   | 0 | 1 | 0 | - | - | - | - | 0 | 0   |
| 0                                 | 0 | 1   | ? | 6 | 0 | 2 | 0 | 0 | 0 | - | -   |
| -                                 | 0 | 0   | 1 | 0 | 0 | 0 | 3 | - | 1 | 0 | 1   |
| 0                                 | 0 | 1   | 0 | - | 0 | 1 | 0 | - | 0 | 1 | 1   |
| 0                                 | 2 | 0&2 | 1 | 0 | ? | 1 | 1 | 1 | 0 | 0 | 1   |
| 0                                 | 1 | 1   | 0 | 0 | 3 | - | 0 | 0 | 0 | 0 | 0   |
| 0                                 | 0 | 0   | 0 | 0 | ? | ? | 0 | ? | ? | ? | 0   |
| -                                 | 0 | 0   | 0 | 0 | 3 | 4 | 1 | ? | ? | ? | 1   |
| 0                                 | 0 | 0   | 1 | ? | 2 | 1 | ? | 1 | ? | ? | 0   |
| 0                                 | 3 | -   | 0 | - | 0 | ? | - | 1 | 1 | 0 | ?   |
| -                                 | - | ?   | ? | 0 | - | 0 | ? | 1 | ? | ? | 0   |
| ?                                 | ? | 0   | 0 | 0 | 0 | 0 | 0 | 0 | 0 | 0 | 0   |
| 0                                 | 0 | 0   | 0 | 0 | 0 | - | - | - | 0 | 0 | 0   |
| 0                                 | - | 1   | ? | 2 | 0 | 0 | 0 | 0 | - | - | ?   |
| -                                 | 0 | -   | ? | - | 1 | 0 | ? | ? | 0 | 1 | 0   |
| 1                                 | ? | 1   | 0 | - | 0 | 0 | 0 | ? | ? | 0 | ?   |
| 1                                 | 0 | 0   | 1 | ? | ? | 0 | ? | ? | ? | 1 | 0   |
| 0                                 | ? | ?   | ? | ? | ? | ? | 1 | ? | 1 | 2 | ?   |
| ?                                 | 2 | ?   | ? | 0 | 0 | 1 | 1 | 1 | 0 | 0 | -   |
| -                                 | - | -   |   |   |   |   |   |   |   |   |     |
| † <i>Panxianichthys imparilis</i> |   |     |   |   |   |   |   |   |   |   |     |
| 0                                 | 0 | 0   | 0 | - | 1 | 0 | 1 | 0 | 0 | 0 | -   |
| ?                                 | ? | ?   | ? | 0 | ? | ? | ? | ? | ? | ? | ?   |
| ?                                 | ? | ?   | ? | ? | ? | ? | ? | ? | ? | ? | ?   |
| ?                                 | ? | ?   | ? | 1 | 0 | ? | ? | ? | ? | ? | ?   |
| ?                                 | ? | 0   | 0 | ? | 0 | - | ? | ? | ? | ? | ?   |
| ?                                 | ? | ?   | 0 | 0 | 0 | ? | ? | ? | 0 | 0 | 0   |
| -                                 | ? | ?   | ? | ? | ? | ? | ? | ? | 1 | 1 | 0   |
| ?                                 | 0 | 0   | 0 | 1 | 0 | 0 | 0 | ? | 0 | 0 | ?   |
| 0                                 | 0 | 0   | 0 | 1 | 1 | 0 | 0 | 0 | 3 | 1 | 0   |
| 3                                 | 1 | 0   | 0 | 0 | 1 | 2 | 0 | 0 | 0 | 3 | 0   |
| 0                                 | 0 | 0   | 1 | 8 | 0 | 2 | 0 | 1 | 0 | - | -   |
| -                                 | 0 | 0   | 2 | 1 | 0 | 1 | 1 | 4 | 1 | 0 | 1&2 |
| 0                                 | 0 | 1   | 0 | 0 | 0 | 0 | ? | ? | 0 | 1 | 1   |
| 1                                 | 1 | 0   | 1 | 1 | 3 | 1 | 0 | 0 | 1 | 0 | 1   |
| ?                                 | 1 | ?   | 0 | 0 | 0 | - | ? | 0 | 0 | 0 | 0   |
| 0                                 | 0 | 0   | 0 | ? | ? | 2 | 0 | 0 | - | 0 | 0   |
| -                                 | 0 | 0   | 0 | 0 | 0 | 1 | 1 | 2 | 0 | 0 | 1   |
| 0                                 | 1 | ?   | 1 | ? | ? | ? | ? | ? | ? | ? | ?   |

|   |   |   |   |   |   |   |   |   |   |   |   |
|---|---|---|---|---|---|---|---|---|---|---|---|
| 0 | 0 | ? | 1 | ? | 0 | 0 | ? | ? | ? | ? | ? |
| ? | ? | ? | ? | ? | ? | ? | ? | ? | ? | ? | ? |
| ? | ? | ? | ? | ? | ? | ? | ? | ? | ? | ? | ? |
| ? | ? | ? | ? | ? | ? | ? | ? | ? | ? | ? | ? |
| ? | ? | ? | ? | ? | ? | ? | ? | ? | ? | ? | ? |
| ? | 0 | ? | ? | ? | 1 | 3 | 0 | ? | 0 | ? | ? |
| 0 | 2 | 0 | 0 | 1 | 0 | 0 | 2 | 2 | 0 | 0 | ? |
| 0 | 0 | ? | ? | 1 | 0 | ? | ? | ? | 1 | 1 | 0 |
| 0 | 2 | 0 | 0 | 0 | 0 | 0 | 1 | 0 | ? | 1 | ? |
| 1 | 3 | ? | ? | ? | ? | ? | ? | ? | 0 | 0 | ? |
| 0 | 0 | 0 |   |   |   |   |   |   |   |   |   |

†*Paralepidotus ornatus*

|   |   |   |   |   |   |   |   |   |   |   |   |
|---|---|---|---|---|---|---|---|---|---|---|---|
| 3 | 0 | 0 | 0 | - | 1 | 0 | 1 | 1 | 0 | 0 | - |
| ? | ? | ? | ? | 0 | ? | ? | ? | ? | ? | ? | ? |
| ? | ? | ? | ? | ? | ? | ? | ? | ? | ? | ? | ? |
| ? | ? | ? | ? | ? | ? | ? | ? | ? | ? | ? | ? |
| ? | ? | ? | ? | ? | ? | ? | ? | ? | 1 | 0 | ? |
| ? | 1 | 0 | 0 | 0 | ? | 0 | 0 | 3 | 0 | 0 | 1 |
| - | ? | ? | ? | ? | ? | ? | ? | ? | ? | ? | ? |
| ? | ? | ? | ? | ? | 0 | 0 | 0 | 4 | 0 | 0 | ? |
| ? | 0 | 0 | 2 | 1 | 3 | 0 | 1 | 0 | ? | ? | ? |
| ? | 1 | ? | 0 | 0 | 0 | 0 | 0 | 0 | 0 | 3 | 0 |
| ? | 0 | ? | ? | 0 | 0 | 2 | ? | 0 | 1 | ? | ? |
| ? | 0 | ? | ? | ? | ? | ? | ? | ? | 1 | 0 | 0 |
| - | - | 1 | 0 | - | 0 | ? | ? | ? | 0 | 1 | ? |
| ? | ? | ? | ? | ? | ? | ? | ? | ? | ? | ? | 1 |
| ? | ? | ? | ? | ? | ? | ? | ? | ? | ? | ? | ? |
| 0 | 0 | ? | ? | 3 | ? | 2 | 0 | 1 | - | 0 | 0 |
| - | 0 | 0 | 0 | 0 | 0 | ? | 1 | 1 | 2 | 1 | 1 |
| 0 | ? | ? | 0 | - | ? | ? | ? | ? | ? | ? | ? |
| ? | ? | ? | ? | ? | ? | 0 | - | 0 | 0 | 0 | ? |
| ? | - | ? | ? | ? | - | ? | ? | ? | ? | ? | ? |
| ? | ? | ? | ? | ? | ? | ? | ? | ? | ? | ? | ? |
| ? | ? | ? | ? | ? | ? | ? | ? | ? | ? | ? | ? |
| ? | ? | ? | ? | ? | ? | ? | ? | ? | ? | ? | ? |
| ? | ? | ? | ? | - | - | ? | ? | ? | ? | ? | ? |
| ? | ? | ? | ? | ? | ? | ? | ? | ? | ? | ? | ? |
| ? | ? | ? | ? | ? | ? | ? | ? | ? | ? | ? | ? |
| ? | 0 | ? | ? | ? | 1 | 3 | 0 | ? | 2 | ? | 0 |
| 0 | 2 | 0 | 0 | 1 | 0 | 0 | - | ? | 0 | 0 | ? |
| 1 | 2 | ? | ? | ? | 0 | ? | ? | ? | ? | 1 | 0 |
| ? | ? | ? | ? | ? | ? | ? | ? | ? | ? | 2 | 1 |
| 1 | ? | ? | ? | ? | ? | ? | ? | 0 | 0 | 0 | ? |
| 0 | 0 | 0 |   |   |   |   |   |   |   |   |   |

†*Parapholidophorus nybelini*

|   |   |   |   |   |   |   |   |   |   |   |   |
|---|---|---|---|---|---|---|---|---|---|---|---|
| 0 | 0 | 1 | 0 | - | 0 | ? | ? | ? | 0 | 0 | - |
| ? | ? | ? | ? | 0 | - | - | ? | ? | ? | ? | ? |
| ? | ? | ? | ? | ? | ? | ? | ? | ? | ? | ? | ? |
| 1 | ? | ? | ? | ? | ? | ? | ? | ? | ? | 0 | - |
| ? | ? | ? | ? | ? | ? | ? | 0 | ? | ? | ? | ? |
| ? | ? | ? | 0 | 0 | ? | 0 | ? | 2 | ? | ? | ? |
| 0 | ? | 0 | ? | ? | ? | ? | ? | 1 | 1 | 1 | 0 |
| 1 | 0 | 0 | 0 | 2 | 0 | 0 | 0 | - | - | - | ? |
| 0 | 0 | - | - | - | 1 | - | ? | 0 | 0 | 2 | 1 |

|   |   |   |   |   |   |     |   |   |   |   |   |
|---|---|---|---|---|---|-----|---|---|---|---|---|
| 0 | 1 | 0 | 0 | 0 | 0 | 1&2 | 0 | 0 | 0 | 0 | 0 |
| 0 | 0 | 1 | 1 | 0 | 1 | 2   | 0 | 0 | 0 | - | - |
| - | 0 | 0 | 0 | 0 | 0 | 1   | 1 | 2 | 1 | 0 | 0 |
| - | - | 0 | 0 | - | 0 | 0   | - | - | 0 | 1 | 0 |
| 2 | 1 | 1 | 0 | 0 | 2 | 2   | - | 0 | 1 | 1 | 1 |
| 0 | 1 | ? | 0 | ? | ? | -   | ? | ? | ? | 1 | 0 |
| 0 | ? | 1 | 0 | ? | ? | 2   | 0 | 0 | - | 0 | 1 |
| 1 | 0 | 1 | 0 | 0 | 2 | 4   | 1 | 1 | 1 | 0 | 1 |
| ? | 0 | ? | 1 | ? | ? | ?   | ? | ? | ? | ? | 1 |
| 3 | 0 | 0 | 0 | 1 | ? | 0   | - | 0 | 1 | 0 | 1 |
| - | - | ? | ? | ? | - | ?   | ? | ? | ? | ? | ? |
| ? | ? | - | ? | ? | ? | ?   | ? | ? | 0 | 0 | ? |
| ? | ? | ? | ? | - | - | 2   | 0 | 0 | ? | ? | ? |
| ? | ? | ? | ? | 0 | 0 | 0   | ? | ? | ? | ? | ? |
| ? | 0 | ? | ? | ? | 1 | 3   | 0 | ? | 2 | 0 | ? |
| 0 | 2 | 0 | 0 | 0 | 0 | 0   | 1 | 1 | 0 | 0 | ? |
| 0 | 0 | ? | ? | 1 | 0 | ?   | ? | ? | ? | 1 | 0 |
| ? | 0 | 0 | 2 | ? | ? | ?   | ? | ? | 0 | 2 | 0 |
| 1 | 2 | 0 | 0 | ? | ? | 0   | ? | ? | 0 | 1 | ? |
| 0 | ? | 1 |   |   |   |     |   |   |   |   |   |

†*Pholidoctenus serianus*

|   |   |   |     |     |   |   |   |   |   |   |   |
|---|---|---|-----|-----|---|---|---|---|---|---|---|
| 0 | 0 | 1 | 0   | -   | 1 | 0 | 0 | - | 0 | 0 | - |
| ? | ? | ? | ?   | 0   | - | - | ? | ? | ? | ? | ? |
| ? | ? | ? | ?   | ?   | ? | ? | ? | ? | ? | ? | ? |
| 1 | ? | ? | ?   | 0   | 0 | ? | ? | ? | ? | 0 | - |
| ? | ? | ? | ?   | ?   | ? | ? | 0 | ? | ? | ? | ? |
| ? | ? | ? | 0   | 0   | 0 | ? | ? | 1 | ? | ? | ? |
| 0 | 0 | 0 | ?   | ?   | ? | ? | ? | ? | ? | ? | ? |
| ? | ? | ? | ?   | ?   | 0 | 2 | 0 | - | - | - | ? |
| ? | 0 | ? | ?   | ?   | 1 | ? | 0 | 0 | 3 | 1 | 0 |
| 0 | 1 | 0 | ?   | 0   | 0 | 2 | 0 | 0 | 0 | 0 | 0 |
| 0 | 0 | 1 | 1   | 1   | 1 | 2 | 0 | 0 | 0 | - | - |
| - | 0 | 0 | 0   | 0   | 0 | 1 | 1 | 2 | 1 | 0 | 1 |
| 0 | 0 | 0 | 0   | -   | 0 | 0 | - | - | 0 | 1 | 0 |
| 1 | 1 | 1 | 1   | 0&1 | 1 | 2 | - | 0 | 1 | ? | 1 |
| 2 | 1 | ? | 0   | ?   | ? | ? | ? | 0 | 0 | ? | 0 |
| 0 | 0 | 1 | 0   | ?   | ? | 2 | 0 | 0 | - | 0 | 0 |
| - | 1 | 1 | 0   | 0   | 2 | 4 | 1 | 1 | 1 | 0 | 1 |
| 0 | 0 | 2 | 1   | ?   | ? | ? | ? | ? | ? | ? | 1 |
| 0 | 0 | 0 | 0   | ?   | 0 | 0 | - | 0 | 1 | 0 | 1 |
| - | - | ? | ?   | 0   | - | 0 | ? | ? | ? | ? | 0 |
| 0 | - | - | 0   | 0   | 0 | 0 | 0 | 0 | 0 | 0 | 0 |
| 0 | 0 | 0 | 0   | -   | - | 2 | 0 | 0 | 0 | 3 | 3 |
| 1 | ? | 0 | 1&2 | 0   | ? | 1 | 0 | 0 | - | - | - |
| - | 0 | ? | ?   | ?   | 1 | 3 | 0 | ? | 0 | 0 | ? |
| 0 | 2 | 0 | 0   | ?   | 0 | 0 | 1 | 1 | 0 | 0 | ? |
| 0 | 0 | ? | ?   | 1   | 0 | 0 | ? | ? | ? | 1 | 0 |
| 0 | ? | 0 | 0&2 | 0   | ? | 0 | 0 | ? | 0 | 2 | ? |
| 1 | 2 | 0 | 0   | ?   | ? | 0 | ? | ? | 0 | 1 | ? |
| 0 | 0 | 1 |     |     |   |   |   |   |   |   |   |

†*Pholidophoretetes salvus*



|   |   |   |   |   |   |   |   |   |   |   |   |
|---|---|---|---|---|---|---|---|---|---|---|---|
| 4 | 0 | 1 | 0 | - | 0 | ? | ? | ? | 0 | ? | ? |
| ? | ? | ? | ? | 0 | - | - | ? | ? | ? | ? | ? |
| ? | ? | ? | ? | ? | ? | ? | ? | ? | ? | ? | ? |
| 1 | ? | ? | ? | ? | 0 | ? | ? | ? | ? | ? | ? |
| ? | ? | ? | ? | ? | ? | ? | ? | ? | ? | ? | ? |
| ? | ? | ? | 0 | 0 | ? | ? | ? | ? | 1 | ? | ? |
| ? | ? | ? | ? | ? | ? | ? | ? | ? | ? | ? | ? |
| ? | ? | ? | ? | ? | 0 | 2 | 0 | - | - | - | ? |
| 0 | 0 | - | - | - | 1 | - | ? | 0 | 3 | 1 | 0 |
| 1 | 0 | 0 | 0 | 0 | ? | 2 | 0 | 0 | 0 | ? | 0 |
| 0 | 0 | 1 | 1 | 1 | 1 | ? | ? | ? | 0 | - | - |
| - | 0 | ? | ? | ? | ? | ? | ? | ? | 1 | 0 | 0 |
| - | - | 0 | 0 | - | 0 | ? | ? | ? | 0 | 1 | 0 |
| 0 | 1 | 1 | 1 | ? | 2 | 1 | 0 | 0 | ? | ? | ? |
| ? | 1 | ? | 0 | ? | ? | ? | ? | ? | 0 | ? | 0 |
| 0 | ? | ? | 0 | ? | ? | 2 | 0 | 0 | - | 0 | 1 |
| 0 | 0 | 1 | 0 | 0 | 2 | 4 | 1 | 1 | 1 | 0 | 1 |
| ? | 0 | 2 | 1 | ? | ? | ? | ? | ? | ? | ? | ? |
| ? | 0 | 0 | 0 | 1 | ? | ? | - | ? | 1 | 0 | ? |
| - | - | ? | ? | ? | ? | ? | ? | ? | ? | ? | ? |
| ? | ? | - | ? | ? | ? | ? | ? | ? | ? | ? | ? |
| ? | ? | ? | ? | - | - | ? | ? | ? | ? | ? | ? |
| ? | ? | ? | ? | ? | ? | ? | ? | ? | ? | ? | ? |
| ? | ? | ? | ? | ? | ? | ? | ? | ? | ? | ? | ? |
| ? | 0 | ? | ? | ? | 1 | ? | 0 | ? | ? | ? | ? |
| 0 | ? | ? | 0 | ? | ? | 0 | 0 | ? | ? | 0 | ? |
| 0 | ? | ? | ? | ? | ? | 0 | ? | ? | ? | 1 | ? |
| ? | ? | 0 | 2 | ? | ? | ? | ? | ? | ? | ? | ? |
| 1 | 2 | ? | ? | ? | ? | ? | ? | ? | 0 | ? | ? |
| 0 | ? | ? |   |   |   |   |   |   |   |   |   |

†*Pholidophorus gervasutti*

|   |   |   |     |   |   |     |   |   |   |   |   |
|---|---|---|-----|---|---|-----|---|---|---|---|---|
| ? | 0 | 0 | 0   | - | 0 | ?   | ? | ? | 0 | 0 | - |
| ? | ? | ? | ?   | 0 | - | -   | ? | ? | ? | ? | ? |
| ? | ? | ? | ?   | ? | ? | ?   | ? | ? | ? | ? | ? |
| ? | ? | ? | ?   | ? | 0 | ?   | ? | ? | ? | 0 | - |
| ? | ? | ? | ?   | ? | ? | ?   | ? | ? | ? | ? | ? |
| ? | ? | ? | 0   | 0 | ? | ?   | ? | ? | 1 | ? | ? |
| 0 | 0 | 0 | ?   | ? | ? | ?   | ? | ? | 2 | 1 | 1 |
| 0 | ? | 0 | 0   | 3 | 0 | 0   | 0 | - | - | - | ? |
| ? | 0 | ? | ?   | ? | 1 | ?   | 0 | 0 | 0 | 1 | 1 |
| 1 | ? | 0 | 0   | 0 | ? | 2&3 | 0 | 0 | 0 | 3 | 0 |
| 0 | 0 | 1 | 1   | 6 | ? | 2   | 0 | ? | 0 | - | - |
| - | 0 | 0 | ?   | ? | 0 | ?   | 1 | 2 | 1 | 0 | 0 |
| - | - | 1 | 0   | - | 0 | ?   | - | - | 0 | 1 | 0 |
| 0 | 1 | 1 | 0&1 | 0 | 2 | 2   | - | 0 | 1 | 1 | 1 |
| 0 | 1 | 3 | 0   | ? | 3 | -   | ? | 0 | ? | 0 | 0 |
| 0 | 0 | ? | 0   | ? | ? | 2   | 0 | 0 | - | 0 | 0 |
| - | 0 | 1 | 1   | ? | 2 | 0   | 1 | 2 | 1 | 1 | 1 |
| ? | 0 | 2 | 1   | 2 | ? | ?   | ? | ? | ? | ? | ? |
| 0 | 0 | 0 | 0   | ? | ? | ?   | - | 0 | 1 | 0 | 1 |
| ? | - | ? | ?   | ? | - | ?   | ? | ? | ? | ? | 0 |
| 0 | ? | - | ?   | ? | ? | ?   | ? | ? | ? | ? | ? |

|                                     |   |   |   |   |   |     |   |   |     |   |     |
|-------------------------------------|---|---|---|---|---|-----|---|---|-----|---|-----|
| ?                                   | ? | ? | ? | - | - | ?   | ? | ? | ?   | ? | ?   |
| ?                                   | ? | ? | ? | ? | ? | ?   | ? | ? | ?   | ? | ?   |
| ?                                   | 0 | ? | ? | ? | 1 | 3   | 0 | ? | 0   | 0 | ?   |
| 0                                   | 2 | 0 | 1 | 0 | 2 | 0   | 1 | 1 | 0   | 0 | 1   |
| 0                                   | 0 | ? | ? | 1 | 0 | ?   | ? | ? | ?   | 1 | 0   |
| ?                                   | ? | 0 | 2 | 2 | ? | ?   | ? | ? | 1   | 3 | 0   |
| 1                                   | 2 | 0 | 0 | ? | ? | 0   | ? | ? | 0   | 1 | ?   |
| 0                                   | 0 | 1 |   |   |   |     |   |   |     |   |     |
| † <i>Pholidorhynchodon malzanni</i> |   |   |   |   |   |     |   |   |     |   |     |
| 0                                   | 0 | 0 | 0 | - | 0 | ?   | ? | ? | 0   | 0 | -   |
| ?                                   | ? | ? | ? | 0 | - | -   | ? | ? | ?   | ? | ?   |
| ?                                   | ? | ? | ? | ? | ? | ?   | ? | ? | ?   | ? | ?   |
| 1                                   | ? | ? | ? | ? | 0 | ?   | ? | ? | ?   | 1 | 1   |
| 1                                   | ? | 1 | 0 | 2 | 1 | ?   | 0 | - | ?   | ? | ?   |
| ?                                   | ? | ? | 0 | 0 | 0 | ?   | ? | 0 | ?   | ? | ?   |
| ?                                   | ? | 0 | ? | ? | ? | ?   | ? | ? | ?   | ? | ?   |
| ?                                   | 0 | 0 | 0 | 2 | 0 | 0   | 0 | - | 0   | - | ?   |
| 0                                   | 0 | 1 | 2 | 1 | 1 | 0   | 0 | 0 | 0&3 | 2 | 1   |
| 1                                   | 1 | 0 | 0 | 0 | 0 | 1&2 | 0 | 0 | 0   | 0 | 0   |
| 0                                   | 0 | 1 | 1 | 1 | 1 | 2   | 0 | ? | 0   | - | -   |
| -                                   | 0 | 0 | 0 | 0 | 0 | 1   | 1 | 2 | 1   | 0 | 0&1 |
| 0                                   | 0 | ? | 0 | - | 0 | 1   | 0 | - | 0   | 1 | 0   |
| 0                                   | 1 | 1 | 0 | 0 | 2 | 2   | - | 0 | 1   | 1 | 1   |
| 0                                   | 1 | 3 | 0 | 0 | 4 | -   | 0 | ? | 1   | 1 | 0   |
| 0                                   | 0 | 0 | 0 | 0 | ? | 2   | 0 | 0 | -   | 0 | 1   |
| 1                                   | 0 | 1 | 1 | 0 | 2 | 1   | 1 | 1 | 0   | 0 | 1   |
| ?                                   | 0 | 2 | 1 | 2 | ? | ?   | ? | ? | ?   | ? | 1   |
| 2                                   | 0 | 0 | 0 | ? | ? | ?   | - | 0 | 1   | 0 | 1   |
| -                                   | - | ? | ? | ? | - | 0   | ? | ? | ?   | ? | ?   |
| ?                                   | ? | - | ? | ? | ? | ?   | ? | ? | ?   | ? | ?   |
| ?                                   | ? | ? | ? | - | - | ?   | ? | ? | ?   | ? | ?   |
| ?                                   | ? | ? | ? | ? | ? | ?   | ? | ? | ?   | ? | ?   |
| ?                                   | 0 | ? | ? | ? | 1 | ?   | 0 | ? | ?   | 0 | ?   |
| 0                                   | 2 | 0 | ? | 1 | 0 | 0   | ? | ? | 0   | 0 | ?   |
| 0                                   | 0 | 0 | ? | 1 | 0 | 0   | ? | ? | ?   | 1 | 0   |
| ?                                   | 0 | 0 | 0 | 0 | 0 | 1   | 0 | ? | 0   | 2 | 0   |
| 1                                   | 2 | 0 | 0 | ? | ? | 0   | 0 | 0 | 0   | 1 | ?   |
| 0                                   | 3 | 1 |   |   |   |     |   |   |     |   |     |
| † <i>Plesiofuro mingshuica</i>      |   |   |   |   |   |     |   |   |     |   |     |
| 0                                   | 0 | ? | 0 | - | 1 | 0   | 1 | 0 | 0   | 0 | -   |
| ?                                   | ? | ? | ? | 0 | ? | ?   | ? | ? | ?   | ? | ?   |
| ?                                   | ? | ? | ? | ? | ? | ?   | ? | ? | ?   | ? | ?   |
| ?                                   | ? | ? | ? | ? | ? | ?   | ? | ? | ?   | ? | ?   |
| ?                                   | ? | ? | ? | ? | ? | ?   | ? | ? | ?   | ? | ?   |
| ?                                   | ? | ? | 0 | 0 | ? | ?   | ? | 0 | ?   | ? | ?   |
| ?                                   | ? | ? | ? | ? | ? | ?   | ? | ? | ?   | ? | ?   |
| ?                                   | 0 | 0 | 0 | 0 | 0 | 0   | 0 | 0 | 0   | 0 | ?   |
| ?                                   | 0 | 1 | 0 | 0 | 1 | 1   | 0 | 0 | 0   | 2 | 0   |
| 0                                   | 0 | 0 | 0 | 0 | 1 | 0   | 0 | 0 | ?   | 3 | 0   |
| ?                                   | 0 | 0 | 3 | 0 | 1 | 2   | ? | 0 | 0   | - | -   |
| -                                   | 0 | 0 | 1 | 0 | 0 | 1   | ? | - | 0   | 0 | 0   |

|   |   |   |   |   |   |   |   |   |   |   |   |
|---|---|---|---|---|---|---|---|---|---|---|---|
| - | - | 0 | 0 | - | 0 | 1 | ? | ? | 0 | 0 | - |
| 0 | 0 | 3 | 0 | 0 | 0 | 0 | - | - | 0 | 0 | 0 |
| - | 1 | ? | 0 | ? | 0 | - | ? | 0 | 0 | 0 | 0 |
| 0 | 0 | 0 | 0 | ? | ? | 1 | 0 | - | - | - | 0 |
| - | 0 | 0 | 0 | 0 | 0 | ? | 0 | - | - | 2 | 0 |
| - | 0 | - | 1 | 0 | ? | ? | ? | ? | 1 | 2 | 0 |
| 1 | 0 | 0 | 0 | ? | 0 | 0 | ? | ? | ? | ? | ? |
| ? | ? | ? | ? | ? | ? | ? | ? | ? | ? | ? | ? |
| ? | ? | ? | ? | ? | ? | ? | ? | ? | ? | ? | ? |
| ? | ? | ? | ? | ? | ? | ? | ? | ? | ? | ? | ? |
| ? | ? | ? | ? | ? | ? | ? | ? | ? | ? | ? | ? |
| ? | 0 | ? | ? | ? | 1 | 1 | ? | ? | 0 | ? | ? |
| 0 | 2 | 0 | 0 | ? | 0 | 0 | - | ? | 0 | 0 | 1 |
| 0 | 0 | ? | ? | 1 | 0 | 0 | ? | ? | 1 | 1 | 0 |
| 0 | 1 | 0 | 2 | 0 | 0 | 0 | 0 | 0 | 0 | 2 | 1 |
| ? | ? | 1 | - | ? | ? | 0 | ? | 0 | 0 | 0 | ? |
| ? | 0 | 0 |   |   |   |   |   |   |   |   |   |

†*Pliodetes nigeriensis*

|   |   |   |   |   |   |   |   |   |   |   |   |
|---|---|---|---|---|---|---|---|---|---|---|---|
| 2 | 0 | 2 | 0 | - | 1 | 0 | 1 | 1 | 0 | 0 | - |
| ? | ? | ? | ? | 0 | ? | ? | ? | ? | ? | ? | ? |
| ? | ? | ? | ? | ? | ? | ? | ? | ? | ? | ? | ? |
| ? | ? | ? | ? | 0 | ? | ? | ? | ? | ? | 1 | 0 |
| ? | ? | ? | ? | ? | ? | ? | ? | ? | 1 | 0 | ? |
| ? | ? | ? | 0 | 0 | ? | ? | ? | ? | ? | ? | ? |
| ? | ? | ? | ? | ? | ? | ? | ? | 3 | ? | ? | ? |
| ? | ? | ? | ? | ? | 1 | 0 | 0 | 4 | 0 | 0 | ? |
| ? | 0 | 0 | 1 | 0 | 0 | 0 | 0 | 0 | 1 | 1 | 0 |
| 3 | 1 | ? | 1 | 0 | 1 | 2 | 0 | 1 | 1 | 4 | 0 |
| ? | 0 | 1 | 0 | 3 | 0 | 0 | 0 | 0 | 1 | 1 | 0 |
| 1 | 0 | 0 | 3 | 1 | 0 | 0 | 1 | 0 | 1 | 0 | 3 |
| 0 | 2 | 0 | 0 | 0 | 0 | 0 | 1 | 2 | 0 | 1 | 2 |
| 4 | 1 | 0 | ? | ? | ? | ? | ? | ? | 0 | 0 | 1 |
| 4 | 0 | ? | ? | ? | 1 | ? | ? | ? | 0 | 0 | 1 |
| 0 | 0 | 1 | 0 | ? | 0 | 3 | 0 | 0 | 0 | 0 | 0 |
| - | 0 | 0 | 0 | 0 | 1 | 3 | 1 | 1 | 1 | 0 | 1 |
| 0 | ? | ? | 0 | - | ? | ? | ? | ? | ? | ? | 1 |
| ? | ? | ? | ? | ? | ? | ? | ? | ? | ? | ? | ? |
| ? | ? | 0 | ? | ? | 0 | ? | ? | ? | ? | ? | ? |
| ? | ? | ? | ? | ? | ? | ? | ? | ? | ? | ? | ? |
| ? | ? | ? | ? | ? | ? | ? | ? | ? | ? | ? | ? |
| ? | ? | ? | ? | ? | ? | ? | ? | ? | ? | ? | ? |
| ? | ? | ? | ? | ? | ? | ? | ? | ? | ? | ? | ? |
| ? | ? | ? | ? | ? | ? | ? | ? | ? | ? | ? | ? |
| ? | ? | ? | ? | ? | ? | ? | ? | ? | ? | ? | ? |
| ? | ? | ? | ? | ? | ? | ? | ? | ? | ? | ? | ? |
| ? | ? | ? | ? | ? | ? | ? | ? | ? | ? | ? | ? |
| ? | ? | ? | ? | ? | ? | ? | ? | ? | ? | ? | ? |
| 0 | ? | ? | 0 | ? | 0 | ? | ? | 1 | ? | 1 | 1 |
| ? | ? | 0 | 2 | 1 | ? | 0 | ? | 1 | ? | 2 | 1 |
| ? | ? | ? | ? | ? | ? | ? | ? | ? | 0 | 0 | ? |
| 0 | 0 | ? |   |   |   |   |   |   |   |   |   |

†*Propterus elongatus*

|   |   |   |   |   |   |   |   |   |   |   |   |
|---|---|---|---|---|---|---|---|---|---|---|---|
| 3 | 0 | 1 | 0 | - | 1 | 0 | 0 | - | 0 | 0 | - |
| ? | ? | ? | ? | 0 | ? | ? | ? | ? | ? | ? | ? |
| ? | ? | ? | ? | ? | ? | ? | ? | ? | ? | ? | ? |

|   |   |   |   |   |   |   |   |   |   |   |   |
|---|---|---|---|---|---|---|---|---|---|---|---|
| ? | ? | ? | 1 | ? | 0 | ? | ? | ? | 1 | ? | ? |
| ? | ? | 1 | 0 | ? | ? | 0 | ? | ? | 1 | 0 | ? |
| ? | ? | ? | 0 | 0 | ? | 0 | ? | 1 | 0 | 0 | 1 |
| - | 0 | ? | ? | ? | ? | 0 | 0 | 3 | ? | 0 | ? |
| ? | ? | ? | ? | ? | 0 | 1 | 1 | - | - | 0 | ? |
| ? | 0 | 0 | 2 | 1 | 3 | 0 | 1 | ? | 2 | 2 | ? |
| ? | 1 | 1 | 0 | 0 | 0 | 1 | 0 | 0 | 0 | 3 | 0 |
| 0 | 0 | 0 | 1 | 7 | 0 | 4 | - | 0 | 1 | 3 | 0 |
| 0 | 0 | 0 | 5 | 1 | 0 | 0 | 1 | 0 | 1 | 1 | - |
| - | - | - | - | - | - | 0 | ? | ? | 0 | 1 | 1 |
| 4 | 1 | 2 | 0 | 0 | ? | 0 | - | - | 0 | 0 | ? |
| ? | ? | ? | ? | ? | ? | ? | ? | 0 | 0 | 0 | 0 |
| 0 | 0 | 0 | 0 | ? | 0 | 2 | 0 | 0 | - | 0 | 0 |
| - | 0 | 0 | 1 | 0 | 0 | 4 | 1 | 1 | 1 | 1 | 1 |
| 1 | 1 | 3 | 0 | - | ? | ? | ? | ? | ? | ? | 1 |
| 3 | 0 | 0 | 0 | ? | 0 | 0 | ? | ? | ? | ? | ? |
| ? | ? | ? | ? | ? | ? | ? | ? | 1 | 0 | ? | ? |
| ? | ? | ? | ? | ? | ? | ? | ? | ? | ? | ? | ? |
| ? | ? | ? | ? | ? | ? | ? | ? | ? | ? | ? | ? |
| ? | ? | ? | ? | ? | ? | ? | ? | ? | ? | ? | ? |
| ? | 0 | ? | 0 | ? | 3 | 2 | 2 | ? | 1 | 0 | 0 |
| 0 | 2 | 0 | 0 | 0 | 0 | 0 | - | ? | 0 | 1 | 1 |
| 1 | 3 | 0 | 1 | 0 | 0 | 2 | ? | ? | 0 | 1 | 3 |
| 3 | 2 | 0 | 0 | 1 | 1 | 0 | 0 | ? | ? | 2 | 1 |
| 1 | ? | 0 | 1 | 0 | ? | 0 | 0 | 0 | 1 | 0 | ? |
| 0 | 0 | 0 |   |   |   |   |   |   |   |   |   |

†*Quetzalichtys perrillatae*

|   |   |   |   |   |   |   |   |   |   |   |   |
|---|---|---|---|---|---|---|---|---|---|---|---|
| 0 | 0 | 1 | 1 | - | - | - | - | - | ? | - | - |
| ? | ? | ? | ? | 0 | ? | ? | ? | ? | ? | ? | ? |
| ? | ? | ? | ? | ? | ? | ? | ? | ? | ? | ? | ? |
| ? | ? | ? | ? | 1 | ? | ? | ? | ? | ? | ? | ? |
| ? | ? | ? | ? | ? | ? | ? | ? | ? | ? | ? | ? |
| ? | ? | ? | 0 | 0 | ? | ? | ? | ? | 0 | 1 | - |
| 0 | ? | ? | ? | ? | ? | ? | ? | ? | ? | 1 | 1 |
| ? | ? | ? | ? | ? | 0 | 0 | 0 | 2 | 1 | 0 | ? |
| 2 | 0 | 0 | 2 | 1 | 1 | 0 | 1 | 0 | 6 | 2 | 1 |
| ? | 1 | 1 | 0 | 0 | 1 | 2 | 0 | 2 | 0 | 3 | 0 |
| ? | 1 | 0 | 1 | 8 | 0 | 3 | 1 | 1 | 0 | - | - |
| - | 0 | 0 | 3 | 1 | 0 | ? | 1 | 4 | 1 | 0 | 2 |
| 0 | 0 | 0 | 0 | 0 | 1 | ? | ? | ? | 0 | 1 | 1 |
| 0 | 1 | 0 | 1 | 1 | 1 | 1 | 0 | 0 | 0 | ? | 1 |
| ? | 1 | ? | 0 | 0 | ? | ? | 0 | 0 | 0 | 0 | 0 |
| 0 | 0 | 0 | 0 | 0 | ? | 2 | 0 | 0 | - | 0 | 0 |
| - | 0 | 0 | 0 | 0 | 0 | 4 | 1 | 1 | 0 | 1 | 1 |
| ? | 0 | 2 | 1 | 0 | ? | ? | ? | ? | ? | ? | ? |
| 0 | 0 | ? | 1 | ? | ? | ? | 0 | 2 | 0 | 0 | 0 |
| 0 | - | 1 | 0 | ? | 0 | 0 | 0 | 1 | 0 | 0 | 0 |
| 0 | - | 0 | 0 | 0 | 0 | 0 | 0 | 0 | 0 | 0 | ? |
| ? | ? | 0 | 0 | 0 | 0 | 0 | 0 | 0 | ? | 0 | 0 |
| 1 | - | 1 | 0 | 0 | 0 | 0 | 0 | 0 | - | - | - |
| - | ? | 0 | 0 | 1 | 1 | ? | ? | 2 | ? | ? | 0 |

|   |   |   |   |   |   |   |   |   |   |   |   |
|---|---|---|---|---|---|---|---|---|---|---|---|
| 0 | 2 | 0 | 1 | - | 1 | 0 | 2 | ? | 0 | 0 | 1 |
| 1 | ? | 0 | 1 | ? | 0 | ? | 1 | 0 | ? | 1 | 0 |
| 0 | 0 | 0 | 0 | 0 | 1 | ? | 0 | 1 | ? | 1 | ? |
| ? | ? | ? | ? | 0 | ? | ? | ? | ? | 1 | 0 | ? |
| 0 | 0 | 0 |   |   |   |   |   |   |   |   |   |

†*Rhacolepis buccalis*

|   |   |   |   |     |   |   |   |   |   |   |   |
|---|---|---|---|-----|---|---|---|---|---|---|---|
| 2 | 0 | 1 | 2 | 0&1 | - | - | - | - | 0 | - | - |
| 1 | 0 | 3 | ? | 1   | 1 | 0 | 0 | 1 | 0 | 3 | 2 |
| 1 | 0 | - | 1 | ?   | 1 | 1 | 2 | 0 | ? | ? | 1 |
| 0 | 0 | 5 | 1 | 0   | 0 | 0 | ? | 1 | 0 | 1 | 1 |
| 2 | 2 | 0 | 0 | -   | 1 | - | ? | ? | 1 | 1 | 0 |
| ? | 2 | 1 | 0 | 0   | 0 | 0 | 2 | 0 | 0 | 1 | - |
| ? | 1 | 1 | ? | ?   | ? | 1 | ? | 4 | 1 | 0 | ? |
| 0 | 0 | 0 | 0 | 3   | 0 | 2 | 0 | 1 | 1 | 1 | - |
| 2 | 1 | 0 | 2 | 1   | 1 | 1 | 0 | 0 | 2 | 2 | 1 |
| 3 | 1 | ? | 0 | 0   | 1 | 3 | - | 0 | 0 | 2 | 0 |
| 0 | 0 | 3 | 1 | 0   | 1 | - | 0 | 0 | 0 | - | - |
| - | 0 | 1 | - | -   | - | - | 3 | - | 1 | 1 | - |
| - | - | - | - | -   | - | 0 | - | - | 0 | 1 | 0 |
| 0 | 2 | 0 | 1 | 0   | 1 | 1 | 0 | 0 | 1 | 0 | 1 |
| 4 | 0 | 3 | 1 | 1   | 1 | 0 | 1 | 0 | 2 | 1 | 0 |
| 0 | 0 | 0 | 0 | -   | 0 | 3 | 0 | 0 | 0 | 0 | 0 |
| - | 0 | 0 | 0 | 0   | 0 | 4 | 1 | 1 | 1 | 1 | 1 |
| 0 | 0 | 0 | 0 | -   | 2 | 0 | ? | ? | 0 | - | 1 |
| 3 | 0 | 0 | 0 | 1   | 0 | 0 | 0 | 1 | 1 | 1 | 0 |
| - | 1 | 0 | 0 | 0   | 0 | 1 | ? | ? | ? | ? | 1 |
| 0 | - | 1 | 0 | 0   | 0 | 1 | 0 | 0 | 0 | 0 | 1 |
| 1 | 1 | 0 | 1 | 1   | 1 | 2 | 1 | 0 | 0 | ? | 4 |
| 1 | 2 | 0 | 2 | 2   | 3 | 0 | 0 | 1 | 2 | 1 | 2 |
| 2 | 0 | 0 | 1 | 1   | 2 | 3 | ? | 4 | 2 | ? | 1 |
| ? | 2 | ? | ? | -   | 2 | 0 | 1 | 1 | 2 | - | 1 |
| 0 | ? | ? | ? | ?   | 0 | 0 | 0 | ? | ? | ? | ? |
| ? | ? | 1 | - | ?   | 0 | 0 | 0 | 0 | 2 | 0 | 0 |
| 0 | 2 | 1 | - | 0   | 0 | ? | 1 | ? | 1 | ? | 2 |
| 1 | 0 | 0 |   |     |   |   |   |   |   |   |   |

†*Robustichthys luopingensis*

|   |   |   |   |   |   |   |   |   |   |   |   |
|---|---|---|---|---|---|---|---|---|---|---|---|
| 3 | 0 | 0 | 0 | - | ? | ? | ? | ? | 0 | 0 | - |
| ? | ? | ? | ? | 0 | ? | ? | ? | ? | ? | ? | ? |
| ? | ? | ? | ? | ? | ? | ? | ? | ? | ? | ? | ? |
| ? | ? | ? | ? | ? | ? | ? | ? | ? | ? | 1 | 0 |
| ? | ? | ? | ? | ? | ? | ? | ? | ? | ? | ? | ? |
| ? | ? | ? | 0 | 0 | ? | ? | ? | 0 | 1 | - | - |
| ? | ? | ? | ? | ? | ? | ? | ? | 0 | 1 | 1 | 0 |
| 1 | ? | ? | ? | ? | 0 | 0 | 0 | 1 | 0 | 0 | ? |
| ? | ? | 0 | 0 | 0 | ? | 0 | 0 | 0 | 5 | 1 | 0 |
| 3 | 1 | ? | 0 | 0 | 1 | 2 | 0 | 0 | 0 | 3 | 0 |
| ? | ? | 0 | 1 | 8 | 0 | 2 | 0 | 1 | 0 | - | - |
| - | 0 | 0 | 2 | 1 | 0 | 1 | 1 | 0 | 1 | 0 | 3 |
| 0 | 2 | 0 | 0 | 0 | 0 | 0 | 1 | 1 | 0 | 1 | 1 |
| 1 | 1 | 0 | 0 | 0 | 3 | 1 | 0 | 0 | 1 | 0 | 1 |
| ? | 1 | ? | 0 | ? | 0 | - | ? | 0 | 0 | 0 | 0 |

|   |   |   |   |   |   |   |   |   |   |   |   |
|---|---|---|---|---|---|---|---|---|---|---|---|
| 0 | 0 | 0 | 0 | 0 | 0 | 2 | 0 | 0 | - | 0 | 0 |
| - | 0 | 0 | 0 | 0 | 0 | 1 | 1 | 1 | 2 | 1 | 1 |
| 0 | ? | ? | 1 | ? | ? | ? | ? | ? | ? | ? | ? |
| 0 | ? | ? | 1 | ? | ? | 0 | ? | ? | ? | ? | ? |
| ? | ? | ? | ? | ? | ? | ? | ? | ? | ? | ? | ? |
| ? | ? | ? | ? | ? | ? | ? | ? | ? | ? | ? | ? |
| ? | ? | ? | ? | ? | ? | ? | ? | ? | ? | ? | ? |
| ? | ? | ? | ? | ? | ? | ? | ? | ? | ? | ? | ? |
| ? | 2 | ? | ? | ? | 1 | 1 | 0 | ? | 0 | ? | 0 |
| 0 | 2 | 0 | 0 | 2 | 0 | 0 | 0 | 2 | 0 | 0 | ? |
| 1 | 0 | ? | ? | 1 | 0 | 0 | ? | ? | 1 | 1 | 0 |
| 0 | ? | 0 | 0 | 0 | ? | 0 | 1 | ? | ? | 2 | 1 |
| ? | 4 | ? | ? | ? | ? | ? | ? | ? | 0 | 0 | ? |
| 0 | 0 | 0 |   |   |   |   |   |   |   |   |   |

*Salmo salar*

|   |     |   |   |   |   |   |   |   |   |   |   |
|---|-----|---|---|---|---|---|---|---|---|---|---|
| 2 | 0   | 1 | 2 | 0 | - | - | - | - | 0 | - | - |
| 1 | 3   | 3 | 1 | 1 | 1 | 0 | 0 | 0 | - | 3 | 2 |
| 0 | 1   | 0 | 0 | ? | 1 | 1 | ? | 0 | 1 | 0 | 1 |
| 0 | 0   | 3 | 1 | 0 | 0 | 0 | 0 | 1 | 0 | 1 | 1 |
| 2 | 2   | 0 | 0 | 0 | 1 | - | 0 | - | 1 | 1 | 0 |
| 1 | 5   | 0 | 0 | 0 | 0 | 0 | 0 | 0 | 0 | 1 | - |
| 0 | 0   | 1 | 1 | 1 | 0 | 1 | ? | 3 | 1 | 0 | 2 |
| 0 | 0   | 0 | 0 | 3 | 1 | 1 | 0 | 2 | 1 | ? | ? |
| 1 | 1   | 0 | ? | ? | 1 | 0 | ? | 0 | 2 | 2 | 1 |
| 3 | 1   | ? | ? | 0 | 0 | 3 | - | 0 | 0 | 2 | 0 |
| 0 | 0   | 1 | 0 | 2 | 0 | 2 | 0 | 0 | 0 | - | - |
| - | 0   | 0 | 6 | - | 1 | 1 | 3 | - | 1 | 1 | - |
| - | -   | - | - | - | - | 0 | - | - | 0 | 1 | ? |
| 3 | 1   | ? | 0 | 0 | 2 | 1 | 0 | 0 | 1 | 0 | 1 |
| 4 | 0   | 3 | ? | 1 | 1 | 0 | 1 | 0 | 0 | 0 | 0 |
| 0 | ?   | 0 | 0 | - | 0 | 3 | 0 | 0 | 0 | 0 | 0 |
| - | 0   | 1 | 0 | 1 | 0 | 4 | 1 | 1 | 1 | 1 | 1 |
| ? | 0   | 2 | 0 | - | 2 | 0 | 3 | 1 | 0 | ? | 1 |
| 3 | 0   | 0 | 0 | 0 | 0 | ? | 0 | 1 | 1 | 1 | 0 |
| - | 1   | 0 | ? | 1 | 0 | 0 | ? | 0 | ? | 1 | 0 |
| 0 | -   | 0 | 0 | 0 | 0 | 0 | 0 | 0 | 0 | 1 | ? |
| ? | ?   | ? | ? | ? | 0 | 2 | 1 | 0 | 0 | 1 | 4 |
| 1 | 1&2 | 0 | 2 | 0 | 0 | 0 | 1 | 1 | 2 | 1 | 1 |
| 2 | 0   | ? | ? | ? | 2 | 3 | ? | 4 | 2 | 0 | 0 |
| 0 | ?   | 1 | ? | - | 2 | 0 | ? | ? | 2 | - | 1 |
| 0 | 0   | 0 | ? | ? | 0 | ? | ? | ? | ? | 1 | 3 |
| ? | 0   | 1 | ? | 0 | 0 | 0 | 0 | ? | 0 | 1 | 1 |
| 0 | 4   | 1 | - | 0 | 0 | 1 | 1 | ? | 1 | 0 | 2 |
| 1 | ?   | 0 |   |   |   |   |   |   |   |   |   |

†*Sangiorgioichthys aldae*

|   |   |   |   |   |   |   |   |   |   |   |   |
|---|---|---|---|---|---|---|---|---|---|---|---|
| 0 | 0 | 0 | 0 | - | 2 | 0 | 0 | - | 0 | 1 | 0 |
| ? | ? | ? | ? | 0 | ? | ? | ? | ? | ? | ? | ? |
| ? | ? | ? | ? | ? | ? | ? | ? | ? | ? | ? | ? |
| ? | ? | ? | ? | 0 | ? | ? | ? | ? | ? | ? | ? |
| ? | ? | ? | ? | ? | ? | ? | ? | ? | ? | ? | ? |
| ? | ? | ? | 0 | 0 | ? | ? | ? | 2 | ? | ? | ? |

|   |     |   |   |   |   |   |   |   |   |   |   |
|---|-----|---|---|---|---|---|---|---|---|---|---|
| ? | ?   | ? | ? | ? | ? | 0 | ? | 3 | ? | 0 | ? |
| ? | ?   | ? | ? | ? | 0 | 0 | 0 | 4 | 0 | 0 | ? |
| ? | 0   | 0 | 0 | 1 | 1 | 0 | 0 | 0 | 5 | 2 | 0 |
| ? | 1   | ? | 0 | 0 | 0 | 2 | 0 | 0 | 0 | 3 | 0 |
| ? | 0   | 0 | 1 | 1 | 0 | 3 | 0 | 0 | 1 | 0 | - |
| - | 0   | 0 | ? | ? | 0 | ? | 1 | ? | 1 | 0 | 3 |
| 1 | 0&1 | 0 | 0 | 0 | 1 | 0 | ? | ? | 0 | 1 | 1 |
| 3 | 1   | 0 | 0 | 0 | 2 | 1 | 0 | 0 | 1 | 0 | 1 |
| 2 | 1   | ? | 0 | ? | 0 | - | ? | 0 | ? | 0 | 1 |
| 0 | 0   | 1 | 0 | ? | ? | 2 | 0 | 0 | - | 0 | 0 |
| - | 0   | 0 | 0 | 0 | 0 | 0 | 1 | 1 | 1 | 1 | 1 |
| 0 | 1   | ? | 0 | - | ? | ? | ? | ? | ? | ? | 0 |
| ? | 0   | ? | ? | ? | 0 | 0 | ? | ? | ? | ? | ? |
| ? | ?   | ? | ? | ? | ? | ? | ? | ? | ? | ? | ? |
| ? | ?   | ? | ? | ? | ? | ? | ? | ? | ? | ? | ? |
| ? | ?   | ? | ? | ? | ? | ? | ? | ? | ? | ? | ? |
| ? | ?   | ? | ? | ? | ? | ? | ? | ? | ? | ? | ? |
| ? | ?   | ? | ? | ? | ? | ? | ? | ? | ? | ? | ? |
| ? | ?   | 0 | ? | 0 | 0 | ? | - | ? | 0 | ? | ? |
| 0 | 0   | ? | ? | ? | 0 | ? | ? | ? | ? | 1 | 0 |
| ? | ?   | 0 | 0 | 0 | ? | 0 | 0 | 1 | ? | 2 | 1 |
| 1 | 3   | 1 | - | ? | ? | ? | ? | ? | 0 | 0 | ? |
| ? | 0   | ? |   |   |   |   |   |   |   |   |   |

†*Sangiorgioichthys sui*

|   |   |   |   |   |     |   |     |   |   |   |     |
|---|---|---|---|---|-----|---|-----|---|---|---|-----|
| 0 | 0 | 0 | 0 | - | 1   | 0 | 0   | - | 0 | 1 | 0   |
| ? | ? | ? | ? | 0 | ?   | ? | ?   | ? | ? | ? | ?   |
| ? | ? | ? | ? | ? | ?   | ? | ?   | ? | ? | ? | ?   |
| ? | ? | ? | ? | 0 | ?   | ? | ?   | ? | ? | 1 | 0   |
| ? | ? | ? | ? | ? | ?   | ? | ?   | ? | ? | 1 | 0   |
| ? | 1 | 1 | 0 | 0 | 0   | 0 | 0   | 1 | 0 | 0 | 1   |
| - | 0 | 0 | ? | ? | ?   | 0 | 0   | 3 | ? | 0 | ?   |
| ? | 0 | 0 | 0 | 1 | 0   | 0 | 0&1 | 4 | 0 | 0 | ?   |
| ? | 0 | 0 | 0 | 0 | 0   | 0 | 0   | 0 | 5 | 1 | 0   |
| 3 | 1 | ? | 0 | 0 | 0   | 2 | 0   | 0 | 0 | 3 | 0   |
| ? | 0 | 0 | 1 | 1 | 0&1 | 2 | 0   | 0 | 1 | 0 | -   |
| - | 0 | 0 | 3 | 1 | 0   | 0 | 1   | 0 | 1 | 0 | 2&3 |
| 1 | 0 | 1 | 1 | 0 | 1   | 0 | 1   | ? | 0 | 1 | 1   |
| 2 | 1 | 0 | 0 | 0 | 2   | 1 | 0   | 0 | 1 | 0 | 1   |
| 2 | 1 | 1 | 0 | 0 | 0   | - | 0   | 0 | 0 | 0 | 0   |
| 0 | 0 | 0 | 0 | ? | ?   | 2 | 0   | 0 | - | 0 | 0   |
| - | 0 | 1 | 0 | 0 | 0   | 0 | 1   | 1 | 1 | 1 | 1   |
| 0 | 1 | 2 | 0 | - | ?   | ? | ?   | ? | 1 | 0 | 0   |
| 3 | 1 | 1 | ? | ? | 0   | 0 | ?   | ? | ? | ? | ?   |
| ? | ? | ? | ? | ? | ?   | ? | ?   | ? | ? | ? | ?   |
| ? | ? | ? | ? | ? | ?   | ? | ?   | ? | ? | ? | ?   |
| ? | ? | ? | ? | ? | ?   | ? | ?   | ? | ? | ? | ?   |
| ? | ? | ? | ? | ? | ?   | ? | ?   | ? | ? | ? | ?   |
| ? | 0 | ? | 0 | ? | 1   | 3 | 0   | ? | 0 | 0 | 0   |
| 0 | 2 | 0 | 0 | 0 | 0   | 0 | -   | ? | 0 | 0 | ?   |
| 0 | 0 | ? | ? | 1 | 0   | 0 | ?   | ? | 1 | 1 | 0   |
| 0 | 2 | 0 | 0 | 0 | ?   | 0 | 0   | 1 | 0 | 2 | 1   |

|                                        |   |   |     |     |   |     |   |   |   |   |   |
|----------------------------------------|---|---|-----|-----|---|-----|---|---|---|---|---|
| 1                                      | ? | 1 | -   | ?   | ? | 0   | ? | ? | 0 | 0 | ? |
| 0                                      | 0 | 0 |     |     |   |     |   |   |   |   |   |
| † <i>Sangiorgioichthys valmarensis</i> |   |   |     |     |   |     |   |   |   |   |   |
| 2                                      | 0 | 0 | 0   | -   | 1 | ?   | ? | ? | 0 | 1 | 0 |
| ?                                      | ? | ? | ?   | 0   | ? | ?   | ? | ? | ? | ? | ? |
| ?                                      | ? | ? | ?   | ?   | ? | ?   | ? | ? | ? | ? | ? |
| ?                                      | ? | ? | ?   | ?   | ? | ?   | ? | ? | ? | ? | ? |
| ?                                      | ? | ? | ?   | ?   | ? | ?   | ? | ? | ? | ? | ? |
| ?                                      | ? | ? | 0   | 0   | ? | ?   | ? | ? | ? | ? | ? |
| ?                                      | ? | ? | ?   | ?   | ? | ?   | ? | ? | ? | ? | ? |
| ?                                      | ? | ? | ?   | ?   | 0 | 0   | 0 | ? | 0 | 0 | ? |
| ?                                      | 0 | 0 | 0   | 1   | 1 | 0   | 0 | 0 | ? | ? | ? |
| ?                                      | ? | ? | 0   | 0   | 0 | 1&2 | 0 | 0 | 0 | 3 | 0 |
| ?                                      | 0 | 0 | ?   | 1   | 0 | 3   | 0 | ? | ? | ? | ? |
| ?                                      | 0 | ? | ?   | ?   | ? | ?   | ? | ? | ? | ? | 3 |
| 1                                      | 0 | 0 | 0   | 0   | 1 | 0   | ? | ? | 0 | 1 | ? |
| ?                                      | 1 | 0 | 0   | 0   | 2 | ?   | ? | ? | ? | ? | ? |
| ?                                      | ? | ? | ?   | ?   | ? | ?   | ? | 0 | ? | ? | 0 |
| 0                                      | 0 | 1 | 0   | ?   | ? | 2   | 0 | 0 | - | 0 | 0 |
| -                                      | 0 | 0 | 0   | 0   | 0 | 0   | 1 | 1 | 1 | 1 | ? |
| ?                                      | 1 | ? | 0   | -   | ? | ?   | ? | ? | ? | ? | 0 |
| ?                                      | 0 | ? | ?   | ?   | 0 | ?   | ? | ? | ? | ? | ? |
| ?                                      | ? | ? | ?   | ?   | ? | ?   | ? | ? | ? | ? | ? |
| ?                                      | ? | ? | ?   | ?   | ? | ?   | ? | ? | ? | ? | ? |
| ?                                      | ? | ? | ?   | ?   | ? | ?   | ? | ? | ? | ? | ? |
| ?                                      | ? | ? | ?   | ?   | ? | ?   | ? | ? | ? | ? | ? |
| ?                                      | ? | ? | ?   | ?   | ? | ?   | ? | ? | ? | ? | ? |
| ?                                      | ? | ? | ?   | ?   | ? | ?   | ? | ? | ? | ? | ? |
| ?                                      | ? | ? | ?   | ?   | ? | ?   | ? | ? | ? | ? | ? |
| ?                                      | ? | ? | ?   | ?   | 1 | ?   | ? | ? | ? | ? | ? |
| ?                                      | ? | 0 | ?   | 0   | 0 | ?   | - | ? | 0 | ? | ? |
| 0                                      | ? | ? | ?   | ?   | 0 | ?   | ? | ? | ? | 1 | 0 |
| ?                                      | ? | 0 | 0   | 0   | ? | 0   | 0 | 1 | ? | 2 | 1 |
| 1                                      | ? | 1 | -   | ?   | ? | ?   | ? | ? | 0 | 0 | ? |
| ?                                      | 0 | 0 |     |     |   |     |   |   |   |   |   |
| † <i>Scheenstia mantelli</i>           |   |   |     |     |   |     |   |   |   |   |   |
| 0                                      | 0 | 0 | 0   | -   | 1 | 1   | 1 | 2 | 0 | 0 | - |
| ?                                      | ? | ? | ?   | 0   | ? | ?   | ? | 1 | 0 | ? | 2 |
| 1                                      | ? | ? | 0   | ?   | ? | ?   | ? | 0 | ? | ? | 1 |
| 1                                      | 0 | ? | ?   | 0   | 0 | 0   | 0 | 0 | 0 | 1 | 0 |
| ?                                      | 2 | 1 | 0   | 2   | 1 | 0   | ? | ? | ? | ? | 0 |
| 0                                      | ? | ? | 0   | 0   | ? | 0   | ? | 2 | ? | ? | ? |
| ?                                      | ? | ? | ?   | ?   | ? | ?   | ? | 3 | ? | ? | ? |
| ?                                      | ? | 0 | 0   | 0   | 2 | 0   | 0 | 4 | 0 | 0 | ? |
| ?                                      | 0 | 0 | 0&2 | 0&1 | 1 | 0   | 1 | 0 | ? | ? | ? |
| ?                                      | 1 | ? | 0   | 0   | 1 | 2   | 0 | 1 | 1 | 4 | 0 |
| 0                                      | 0 | 1 | 1   | 3   | 0 | 0   | 0 | 0 | 1 | 3 | ? |
| 1                                      | 0 | ? | ?   | ?   | ? | ?   | ? | ? | 1 | 0 | 3 |
| 1                                      | 0 | 0 | 0   | 1   | 0 | 0   | 1 | 1 | 0 | 1 | 2 |
| 4                                      | 3 | ? | 0   | 0   | 1 | 1   | 0 | 0 | 1 | 0 | 1 |
| 0                                      | 1 | ? | 0   | ?   | 1 | ?   | ? | 0 | ? | ? | ? |
| 0                                      | 0 | 1 | 2   | 3   | ? | 2   | 0 | 0 | - | 0 | 0 |
| -                                      | 0 | 0 | 0   | 0   | 0 | 1   | 1 | 1 | 1 | 1 | 1 |
| 0                                      | 0 | ? | 0   | -   | ? | ?   | ? | ? | ? | ? | 0 |



|   |   |   |   |   |   |   |   |   |   |   |   |
|---|---|---|---|---|---|---|---|---|---|---|---|
| 0 | 0 | ? | 0 | ? | ? | 0 | - | 1 | 0 | 0 | ? |
| ? | - | ? | ? | ? | ? | ? | ? | ? | ? | ? | ? |
| ? | ? | ? | ? | ? | ? | ? | ? | ? | ? | ? | ? |
| ? | ? | ? | ? | ? | ? | ? | ? | ? | ? | ? | ? |
| ? | ? | ? | ? | ? | ? | ? | ? | ? | ? | ? | ? |
| ? | ? | ? | ? | ? | ? | ? | 0 | ? | ? | ? | ? |
| 0 | 0 | 0 | 0 | 2 | 0 | 0 | - | ? | 0 | 0 | ? |
| ? | ? | ? | ? | ? | 0 | ? | ? | ? | ? | 1 | 1 |
| ? | ? | 0 | 2 | 1 | 2 | 0 | 0 | 1 | ? | 2 | ? |
| 1 | 4 | ? | ? | ? | ? | 0 | ? | ? | 0 | ? | ? |
| ? | 0 | ? |   |   |   |   |   |   |   |   |   |

†*Scheenstia maximus*

|   |   |   |   |   |   |   |   |   |   |   |   |
|---|---|---|---|---|---|---|---|---|---|---|---|
| 0 | 0 | 0 | 0 | - | 1 | 1 | 1 | 2 | 0 | 1 | 0 |
| ? | ? | ? | ? | 0 | ? | ? | ? | ? | ? | ? | ? |
| ? | ? | ? | ? | ? | ? | ? | ? | ? | ? | ? | ? |
| ? | ? | ? | ? | ? | ? | ? | ? | ? | ? | ? | ? |
| ? | ? | ? | ? | ? | ? | ? | ? | ? | 1 | 1 | ? |
| ? | ? | ? | ? | 0 | ? | ? | ? | 1 | ? | ? | ? |
| ? | ? | ? | ? | ? | ? | ? | ? | ? | ? | ? | ? |
| ? | ? | ? | ? | ? | 2 | 0 | 0 | 4 | 0 | 0 | ? |
| ? | 0 | ? | ? | ? | ? | 0 | 1 | 0 | ? | ? | ? |
| ? | 1 | ? | 0 | 0 | 1 | 2 | 0 | 1 | 0 | 4 | 0 |
| ? | 0 | 2 | 1 | 3 | 0 | 0 | 0 | 0 | 1 | 3 | ? |
| 1 | 0 | ? | ? | ? | ? | ? | ? | ? | 1 | 0 | 3 |
| 1 | 0 | 0 | 0 | 1 | 0 | 0 | ? | ? | ? | ? | ? |
| ? | ? | ? | ? | ? | ? | ? | ? | ? | ? | ? | 1 |
| ? | ? | ? | ? | ? | ? | ? | ? | ? | 0 | 0 | ? |
| 0 | 0 | 1 | 3 | 3 | 3 | 2 | 0 | 0 | - | 0 | 0 |
| - | 0 | 0 | 0 | 0 | 0 | 1 | 1 | 1 | 1 | 1 | 1 |
| 0 | ? | ? | ? | ? | ? | ? | ? | ? | ? | ? | ? |
| ? | ? | ? | ? | ? | ? | 0 | ? | ? | ? | ? | ? |
| ? | ? | ? | ? | ? | ? | ? | ? | ? | ? | ? | ? |
| ? | ? | ? | ? | ? | ? | ? | ? | ? | ? | ? | ? |
| ? | ? | ? | ? | ? | ? | ? | ? | ? | ? | ? | ? |
| ? | ? | ? | ? | ? | ? | ? | ? | ? | ? | ? | ? |
| ? | ? | ? | ? | ? | ? | ? | ? | ? | ? | ? | ? |
| ? | ? | ? | ? | ? | ? | ? | ? | ? | ? | ? | ? |
| ? | 1 | ? | ? | ? | ? | ? | 0 | ? | ? | ? | ? |
| 0 | 0 | 0 | 0 | 2 | 0 | 0 | - | ? | 0 | 0 | 1 |
| 0 | 2 | ? | ? | 0 | 0 | 2 | ? | ? | 0 | 1 | 1 |
| 1 | ? | 0 | 2 | 1 | 2 | 0 | 0 | 1 | ? | 2 | ? |
| ? | ? | ? | ? | ? | ? | 0 | ? | ? | 0 | 0 | ? |
| 0 | 0 | 0 |   |   |   |   |   |   |   |   |   |

†*Scheenstia zappi*

|   |   |   |   |   |   |   |   |   |   |   |   |
|---|---|---|---|---|---|---|---|---|---|---|---|
| 0 | 0 | 0 | 0 | - | 1 | ? | ? | ? | 0 | 1 | 0 |
| ? | ? | ? | ? | 0 | ? | ? | ? | ? | ? | ? | ? |
| ? | ? | ? | ? | ? | ? | ? | ? | ? | ? | ? | ? |
| ? | ? | ? | ? | ? | ? | ? | ? | ? | 0 | 1 | 0 |
| ? | ? | ? | ? | ? | ? | ? | ? | ? | ? | ? | 0 |
| 0 | ? | ? | 0 | 0 | ? | ? | ? | ? | 0 | 0 | 1 |
| - | ? | ? | ? | ? | ? | ? | ? | ? | ? | 0 | ? |
| ? | ? | ? | ? | ? | 2 | 0 | 0 | 4 | 0 | 0 | ? |
| ? | 0 | 0 | 0 | 0 | 1 | 0 | 1 | ? | 1 | 1 | 0 |

|   |   |   |   |   |   |   |   |   |   |   |   |
|---|---|---|---|---|---|---|---|---|---|---|---|
| 3 | 1 | 1 | 0 | 0 | 1 | 2 | 0 | 1 | 0 | 3 | 0 |
| ? | 0 | 1 | 1 | 3 | 0 | 2 | 0 | 0 | 1 | 3 | ? |
| 1 | 0 | 0 | 3 | 1 | 0 | 0 | 1 | ? | 1 | 0 | 3 |
| 1 | 0 | 0 | 0 | 1 | 0 | 0 | 1 | 1 | 0 | 1 | ? |
| ? | ? | ? | ? | ? | ? | ? | ? | ? | 1 | 0 | 1 |
| 0 | 1 | ? | 0 | ? | 1 | ? | ? | 0 | ? | 0 | ? |
| 0 | 0 | 0 | 2 | 2 | ? | 2 | 0 | 0 | - | 0 | 0 |
| - | 0 | 0 | 0 | 1 | 0 | 1 | 1 | 1 | ? | 0 | 1 |
| 0 | ? | ? | 0 | - | ? | ? | ? | ? | 1 | 1 | 0 |
| 0 | 0 | 1 | 0 | ? | 0 | ? | ? | ? | ? | ? | ? |
| ? | ? | ? | ? | ? | ? | ? | ? | ? | ? | ? | ? |
| ? | ? | ? | ? | ? | ? | ? | ? | ? | ? | ? | ? |
| ? | ? | ? | ? | ? | ? | ? | ? | ? | ? | ? | ? |
| ? | ? | ? | ? | ? | ? | ? | ? | ? | ? | ? | ? |
| ? | ? | ? | ? | ? | ? | ? | ? | ? | ? | ? | ? |
| ? | 2 | ? | ? | ? | 1 | ? | 0 | ? | ? | ? | ? |
| 0 | 0 | 0 | 0 | 2 | 0 | 0 | - | ? | 0 | 0 | ? |
| 0 | 0 | ? | ? | 1 | 0 | ? | ? | ? | ? | 1 | 0 |
| 0 | 1 | 0 | 2 | 1 | 2 | 0 | 0 | 1 | 1 | ? | ? |
| 1 | 5 | ? | ? | 0 | ? | 0 | ? | ? | ? | 0 | ? |
| 0 | 0 | 0 |   |   |   |   |   |   |   |   |   |

†*Semiolepis bremanus*

|   |   |   |   |   |     |   |   |   |   |   |   |
|---|---|---|---|---|-----|---|---|---|---|---|---|
| 0 | 0 | 0 | 0 | - | 0&1 | 0 | 1 | 1 | 0 | 1 | 1 |
| ? | ? | ? | ? | 0 | ?   | ? | ? | ? | ? | ? | ? |
| ? | ? | ? | ? | ? | ?   | ? | ? | ? | ? | ? | ? |
| ? | ? | ? | ? | ? | ?   | ? | ? | ? | ? | ? | ? |
| ? | ? | ? | ? | ? | ?   | ? | ? | ? | ? | ? | ? |
| ? | ? | ? | 0 | 0 | ?   | ? | ? | 3 | 0 | 0 | 1 |
| - | ? | ? | ? | ? | ?   | ? | ? | ? | ? | ? | ? |
| ? | ? | ? | ? | ? | 2   | 0 | 0 | 4 | 0 | 0 | ? |
| ? | 0 | 0 | 2 | 1 | 1   | 0 | 1 | 0 | 1 | 1 | 0 |
| ? | 1 | ? | 0 | 0 | 0   | 0 | 0 | 0 | 0 | 3 | 0 |
| ? | 0 | 0 | ? | 1 | 0   | 0 | ? | 0 | 1 | 2 | 0 |
| 0 | 0 | 0 | 3 | 1 | 0   | 0 | 1 | ? | 1 | 0 | 0 |
| - | - | 1 | 0 | - | 0   | ? | ? | ? | 0 | 1 | 1 |
| 4 | 1 | 0 | 0 | 0 | ?   | ? | ? | ? | 1 | ? | 1 |
| ? | ? | ? | ? | ? | ?   | ? | ? | ? | ? | ? | 0 |
| 0 | 0 | ? | ? | 2 | ?   | 2 | 0 | 1 | - | 0 | 0 |
| - | 0 | 0 | 0 | 0 | 0   | 4 | 1 | 1 | 2 | 1 | 1 |
| 1 | ? | ? | 0 | - | ?   | ? | ? | ? | ? | ? | ? |
| ? | ? | ? | ? | ? | ?   | 0 | ? | ? | ? | ? | ? |
| ? | ? | ? | ? | ? | ?   | ? | ? | ? | ? | ? | ? |
| ? | ? | ? | ? | ? | ?   | ? | ? | ? | ? | ? | ? |
| ? | ? | ? | ? | ? | ?   | ? | ? | ? | ? | ? | ? |
| ? | ? | ? | ? | ? | ?   | ? | ? | ? | ? | ? | ? |
| ? | ? | ? | ? | ? | ?   | ? | ? | ? | ? | ? | ? |
| ? | ? | ? | ? | ? | ?   | ? | ? | ? | ? | ? | ? |
| ? | ? | ? | ? | ? | ?   | ? | ? | ? | ? | ? | ? |
| ? | 2 | ? | ? | ? | 1   | 3 | 0 | ? | 2 | ? | ? |
| 0 | 2 | 0 | 0 | 1 | 0   | 0 | - | ? | 0 | 0 | ? |
| 0 | 0 | ? | ? | ? | 0   | ? | ? | ? | ? | 1 | 0 |
| 0 | 2 | ? | ? | ? | ?   | ? | ? | ? | ? | 2 | 1 |
| 1 | ? | ? | ? | ? | ?   | ? | ? | 0 | 0 | 0 | ? |
| 0 | 0 | 0 |   |   |     |   |   |   |   |   |   |

†*Semionotus bergeri*

|   |   |   |   |   |   |   |   |   |   |   |   |
|---|---|---|---|---|---|---|---|---|---|---|---|
| 0 | 0 | 1 | 0 | - | 1 | 0 | 1 | 1 | 0 | 1 | 1 |
| ? | ? | ? | ? | 0 | ? | ? | ? | ? | ? | ? | ? |
| ? | ? | ? | ? | ? | ? | ? | ? | ? | ? | ? | ? |
| ? | ? | ? | ? | 1 | 0 | ? | ? | ? | ? | 1 | 0 |
| ? | ? | ? | ? | ? | ? | ? | ? | ? | ? | ? | ? |
| ? | ? | ? | 0 | 0 | ? | ? | ? | ? | 3 | ? | ? |
| ? | ? | ? | ? | ? | ? | ? | ? | ? | ? | ? | 0 |
| ? | ? | ? | ? | ? | 0 | 0 | 0 | 3 | 0 | 0 | ? |
| ? | 0 | 0 | 0 | 1 | 1 | 0 | 1 | ? | ? | ? | ? |
| ? | 1 | 1 | 0 | 0 | 1 | 1 | 0 | 0 | 0 | 3 | 0 |
| 0 | 0 | 0 | 2 | 7 | 0 | 0 | 0 | 0 | 1 | 2 | 0 |
| 0 | 0 | 0 | ? | ? | 0 | 0 | ? | ? | ? | 0 | 0 |
| - | - | 1 | 0 | - | 0 | 0 | 1 | ? | 0 | 1 | ? |
| ? | ? | ? | ? | ? | ? | ? | ? | ? | ? | ? | 1 |
| ? | ? | ? | ? | ? | ? | ? | ? | ? | ? | ? | 0 |
| 0 | 0 | 1 | 0 | ? | ? | 2 | 0 | 0 | - | 0 | 0 |
| - | 0 | 0 | 0 | 0 | 0 | 0 | 1 | 1 | 1 | 1 | 1 |
| 0 | 0 | ? | 0 | - | ? | ? | ? | ? | ? | ? | 0 |
| ? | 0 | 0 | ? | ? | 0 | 0 | ? | ? | ? | ? | ? |
| ? | ? | ? | ? | ? | ? | ? | ? | ? | ? | ? | ? |
| ? | ? | ? | ? | ? | ? | ? | ? | ? | ? | ? | ? |
| ? | ? | ? | ? | ? | ? | ? | ? | ? | ? | ? | ? |
| ? | ? | ? | ? | ? | ? | ? | ? | ? | ? | ? | ? |
| ? | 0 | ? | ? | ? | 3 | ? | 1 | ? | ? | 0 | 0 |
| 0 | 0 | 0 | 0 | ? | 0 | ? | - | ? | 0 | 0 | ? |
| 0 | 0 | ? | ? | ? | 0 | ? | ? | ? | ? | 1 | 2 |
| ? | 1 | 0 | 2 | ? | ? | 0 | 0 | ? | ? | 2 | 1 |
| 1 | ? | ? | ? | ? | ? | ? | 0 | ? | 0 | 0 | ? |
| 0 | 0 | 0 |   |   |   |   |   |   |   |   |   |

†*Semionotus capensis*

|   |   |   |   |   |   |   |   |   |   |   |   |
|---|---|---|---|---|---|---|---|---|---|---|---|
| 0 | 0 | 1 | 0 | - | ? | 0 | 1 | 1 | 0 | 1 | 1 |
| ? | ? | ? | ? | 0 | ? | ? | ? | ? | ? | ? | ? |
| ? | ? | ? | ? | ? | ? | ? | ? | ? | ? | ? | ? |
| ? | ? | ? | ? | 1 | 0 | ? | ? | ? | ? | 1 | 0 |
| ? | ? | ? | ? | ? | ? | ? | ? | ? | ? | ? | 0 |
| ? | 1 | ? | 0 | 0 | ? | 0 | 0 | 3 | 0 | 0 | 1 |
| - | 0 | ? | ? | ? | ? | ? | ? | 3 | ? | 0 | ? |
| ? | ? | ? | ? | ? | 1 | 0 | 0 | 3 | 0 | 0 | ? |
| ? | 0 | 0 | 0 | 1 | 1 | 0 | 1 | 0 | 5 | 1 | 0 |
| ? | 1 | 1 | 0 | 0 | 0 | 1 | 0 | 0 | 0 | 3 | 0 |
| 0 | 0 | 0 | 0 | 7 | 0 | 2 | ? | 0 | 1 | 2 | ? |
| 0 | 0 | 0 | 3 | 1 | 0 | 0 | ? | ? | ? | 0 | 0 |
| - | - | 1 | 0 | - | 0 | 0 | 1 | 1 | 0 | 1 | ? |
| ? | ? | ? | ? | ? | ? | ? | ? | ? | 1 | 0 | 1 |
| ? | ? | ? | ? | ? | ? | ? | ? | ? | ? | 0 | ? |
| 0 | 0 | 1 | 0 | ? | ? | 2 | 0 | 0 | - | 0 | 0 |
| - | 0 | 0 | 0 | 0 | 0 | 0 | 1 | 1 | 1 | 1 | 1 |
| 0 | 0 | ? | 0 | - | ? | ? | ? | ? | ? | ? | 0 |
| ? | 0 | ? | ? | ? | 0 | 0 | ? | ? | ? | ? | ? |
| ? | ? | ? | ? | ? | ? | ? | ? | ? | ? | ? | ? |
| ? | ? | ? | ? | ? | ? | ? | ? | ? | ? | ? | ? |

|   |   |   |   |   |   |   |   |   |   |   |   |   |
|---|---|---|---|---|---|---|---|---|---|---|---|---|
| ? | ? | ? | ? | ? | ? | ? | ? | ? | ? | ? | ? | ? |
| ? | ? | ? | ? | ? | ? | ? | ? | ? | ? | ? | ? | ? |
| ? | 0 | ? | 0 | ? | 3 | ? | 1 | ? | ? | ? | 0 | 0 |
| 0 | 0 | 0 | 0 | 1 | 0 | ? | - | ? | ? | 0 | 0 | 1 |
| 0 | 0 | 0 | 1 | 0 | 0 | 0 | ? | ? | ? | ? | 1 | 2 |
| 2 | 0 | 0 | 2 | 1 | ? | 0 | 0 | ? | ? | ? | 2 | ? |
| ? | ? | ? | ? | ? | ? | ? | ? | ? | ? | 0 | 0 | ? |
| 0 | 0 | 0 |   |   |   |   |   |   |   |   |   |   |

†*Semionotus elegans*

|   |   |   |   |   |   |   |   |   |   |   |   |   |
|---|---|---|---|---|---|---|---|---|---|---|---|---|
| 0 | 0 | 1 | 0 | - | 0 | 0 | ? | ? | 0 | 1 | 1 | 1 |
| ? | ? | ? | ? | 0 | ? | ? | ? | 1 | 1 | ? | ? | 2 |
| 0 | 0 | - | 0 | 0 | 1 | 1 | ? | 1 | - | - | ? | ? |
| ? | ? | ? | ? | 1 | 0 | ? | ? | ? | ? | ? | 1 | 0 |
| 1 | ? | 1 | 0 | 2 | ? | ? | 1 | 3 | 1 | 0 | 0 | 0 |
| 0 | 1 | ? | 0 | 0 | ? | 0 | 0 | 2 | 0 | 0 | 0 | 1 |
| - | 0 | 0 | ? | ? | ? | 0 | ? | 2 | 1 | 0 | 0 | 4 |
| 1 | ? | 0 | 0 | 0 | 0 | 0 | 0 | 3 | 0 | 0 | 0 | 1 |
| 0 | 0 | 1 | 0 | 1 | 1 | 0 | 1 | 0 | 5 | 1 | 0 | 0 |
| 3 | 1 | 1 | 0 | 0 | 1 | 1 | 0 | 0 | 0 | 3 | 0 | 0 |
| 0 | 0 | 0 | 0 | 6 | 0 | 0 | 0 | 0 | 1 | 1 | 0 | 0 |
| 0 | 0 | 0 | 3 | 1 | 0 | 0 | 1 | 0 | 1 | 0 | 0 | 0 |
| - | - | 1 | 0 | - | 0 | 0 | 1 | 1 | 0 | 1 | 1 | 2 |
| 4 | 1 | ? | 0 | 0 | 1 | 1 | 0 | 0 | 1 | 0 | 0 | 1 |
| 0 | 1 | 1 | 0 | 0 | 1 | 0 | ? | 0 | 0 | 0 | 0 | 0 |
| 0 | 0 | 1 | 0 | 0 | 0 | 2 | 0 | 0 | - | 0 | 0 | 0 |
| - | 0 | 0 | 0 | 0 | 0 | 4 | 1 | 1 | 1 | 1 | 1 | 1 |
| 0 | 0 | 3 | 0 | - | ? | ? | ? | 1 | 1 | 1 | 1 | 0 |
| ? | 0 | 0 | 0 | ? | 0 | 0 | - | 0 | 0 | 0 | 0 | ? |
| ? | - | ? | ? | ? | - | 0 | ? | 1 | 0 | ? | ? | ? |
| ? | ? | ? | 0 | 0 | 0 | ? | 0 | 0 | 0 | 0 | 0 | ? |
| ? | ? | ? | ? | - | - | ? | ? | ? | ? | ? | ? | ? |
| ? | ? | 0 | ? | 0 | ? | 0 | 0 | 0 | - | - | - | - |
| - | 0 | ? | 0 | ? | 3 | 2 | 1 | 3 | 1 | ? | ? | ? |
| 0 | 0 | 0 | 0 | ? | 0 | ? | - | ? | 0 | 0 | 0 | 1 |
| 0 | 0 | 0 | 1 | ? | 0 | ? | ? | 1 | ? | 1 | 1 | 2 |
| 0 | ? | 0 | 2 | 1 | ? | 0 | 0 | ? | 0 | 0 | 2 | 1 |
| 1 | ? | 0 | 1 | ? | ? | 0 | 0 | ? | 0 | 0 | 0 | ? |
| 0 | 0 | 0 |   |   |   |   |   |   |   |   |   |   |

†*Siemensichthys macrocephalus*

|   |   |   |   |     |   |   |   |   |   |   |   |   |
|---|---|---|---|-----|---|---|---|---|---|---|---|---|
| 2 | 0 | 0 | 0 | -   | 1 | 0 | 0 | - | 0 | 0 | 0 | - |
| 1 | ? | 0 | ? | 1   | ? | ? | 0 | 0 | - | 1 | 1 | 1 |
| 0 | ? | ? | ? | 0   | ? | ? | 1 | 0 | 1 | 1 | 1 | 0 |
| 0 | 0 | ? | ? | 0   | ? | 0 | ? | ? | 0 | 1 | 1 | 1 |
| 1 | 1 | 1 | 0 | ?   | ? | ? | 0 | - | 1 | 1 | 0 | 0 |
| 0 | ? | ? | 0 | 0   | ? | ? | ? | 0 | 0 | 1 | - | ? |
| ? | ? | ? | ? | ?   | ? | 1 | ? | ? | ? | 0 | ? | ? |
| 0 | ? | ? | 0 | ?   | 0 | ? | 0 | 2 | 0 | ? | ? | 1 |
| 1 | 0 | 1 | 2 | 1   | 1 | 0 | 0 | 0 | 3 | 1 | 1 | 1 |
| 1 | 1 | 0 | ? | 0   | 0 | 3 | - | 0 | ? | 0 | ? | ? |
| ? | ? | 3 | 1 | 0&1 | 1 | 2 | 0 | 0 | 0 | - | - | - |
| - | 0 | ? | ? | ?   | ? | ? | 1 | 3 | 1 | 1 | - | - |

|   |   |   |   |   |   |   |   |   |   |   |   |
|---|---|---|---|---|---|---|---|---|---|---|---|
| - | - | - | - | - | - | 1 | 0 | - | 0 | 1 | 1 |
| 1 | 1 | 0 | 1 | 0 | 1 | 1 | 0 | 0 | 1 | 0 | 1 |
| 0 | 1 | 3 | 0 | 0 | 4 | - | ? | 0 | ? | ? | 0 |
| 0 | ? | ? | ? | ? | ? | 3 | 0 | 0 | 0 | 1 | 1 |
| 0 | 0 | 1 | 0 | ? | 2 | 0 | 1 | 1 | 0 | 0 | 1 |
| 1 | ? | 2 | 1 | 2 | ? | ? | ? | ? | ? | ? | 0 |
| ? | 0 | 0 | 0 | 2 | ? | ? | - | 1 | 1 | 0 | 0 |
| ? | - | ? | ? | ? | ? | ? | ? | ? | ? | ? | 0 |
| ? | ? | ? | 0 | 0 | 1 | ? | 1 | 1 | ? | ? | ? |
| ? | ? | ? | ? | ? | ? | ? | ? | ? | ? | ? | ? |
| ? | ? | ? | ? | ? | ? | ? | ? | ? | ? | ? | ? |
| ? | ? | ? | ? | ? | ? | ? | ? | ? | ? | ? | ? |
| ? | ? | ? | ? | ? | ? | 1 | ? | ? | 0 | ? | ? |
| 1 | ? | 1 | ? | ? | ? | ? | ? | ? | ? | ? | ? |
| 0 | ? | ? | ? | ? | 0 | ? | ? | ? | ? | 1 | ? |
| ? | ? | 0 | ? | ? | ? | ? | ? | ? | ? | 2 | 1 |
| 1 | ? | 0 | 0 | ? | ? | 1 | ? | ? | 0 | 0 | ? |
| 0 | 2 | ? |   |   |   |   |   |   |   |   |   |

†*Solnhofenamia elongata*

|   |   |   |     |   |   |   |   |   |   |   |   |
|---|---|---|-----|---|---|---|---|---|---|---|---|
| 3 | 0 | 1 | 1   | - | - | - | - | - | 0 | - | - |
| ? | ? | ? | ?   | 0 | ? | ? | ? | ? | ? | ? | ? |
| 1 | ? | ? | ?   | ? | ? | ? | 2 | 0 | ? | ? | 1 |
| 1 | ? | ? | 1   | ? | 0 | ? | ? | ? | ? | 0 | 0 |
| 1 | 2 | ? | 0   | 2 | ? | ? | 1 | 1 | 1 | 0 | ? |
| 0 | ? | 1 | 0   | 0 | 0 | 0 | 1 | 0 | 1 | - | - |
| - | 0 | 0 | 0   | 0 | - | 0 | ? | 2 | 1 | 1 | 0 |
| ? | ? | ? | ?   | 2 | 0 | 0 | 0 | 2 | ? | 0 | ? |
| 0 | 0 | 1 | 0   | 1 | 2 | 0 | 0 | 0 | 3 | 1 | 0 |
| 3 | 1 | 0 | 0   | 0 | 1 | 2 | 0 | 2 | 0 | 3 | 0 |
| 0 | 1 | 2 | 0&1 | 1 | 0 | 2 | 0 | 0 | 0 | - | - |
| - | 0 | 0 | 2   | 1 | 0 | 1 | 1 | 4 | 1 | 0 | 0 |
| - | - | 0 | 0   | - | 0 | 0 | 1 | 1 | 0 | 1 | 1 |
| 0 | 1 | 0 | 1   | 1 | 1 | 1 | 0 | 0 | 0 | 0 | 1 |
| 0 | 1 | 1 | 0   | ? | 1 | 0 | 0 | 0 | 0 | 0 | 0 |
| 0 | 0 | 0 | 0   | 0 | 0 | 2 | 0 | 0 | - | 0 | 0 |
| - | 0 | 0 | 0   | 0 | 3 | 2 | 1 | 1 | 1 | 1 | 1 |
| 0 | 1 | 1 | 1   | 1 | 0 | 1 | ? | ? | 1 | 1 | 0 |
| 3 | 0 | ? | 0   | 1 | 0 | 0 | 0 | 2 | 0 | 0 | 1 |
| 2 | - | 1 | 0   | 0 | 0 | 0 | 1 | 1 | 1 | 0 | 0 |
| 0 | ? | 0 | 0   | 0 | 0 | 0 | 0 | 0 | 1 | 1 | 0 |
| 0 | 0 | 1 | -   | 0 | 0 | 1 | 1 | 0 | 0 | 3 | 4 |
| 1 | 2 | 1 | 0   | 0 | 0 | 0 | 0 | 0 | - | - | - |
| - | 1 | 1 | 0   | 0 | 3 | 0 | ? | 2 | 0 | 0 | 0 |
| 0 | 2 | 1 | 0   | - | 1 | 0 | 2 | 2 | 2 | - | 1 |
| 1 | 2 | 0 | 1   | 1 | 0 | 2 | 1 | 0 | 1 | 1 | 3 |
| 3 | 0 | 1 | -   | 0 | 0 | 0 | 0 | 0 | 1 | 1 | 0 |
| 1 | 1 | 0 | 1   | 0 | ? | 0 | ? | 0 | 1 | 0 | 0 |
| 1 | 0 | 0 |     |   |   |   |   |   |   |   |   |

†*Teoichthys brevipina*

|   |   |   |   |   |   |   |   |   |   |   |   |
|---|---|---|---|---|---|---|---|---|---|---|---|
| 3 | 0 | - | 0 | - | 0 | ? | ? | ? | 0 | 0 | - |
| ? | ? | ? | ? | 0 | ? | ? | ? | ? | ? | ? | ? |
| ? | ? | ? | ? | ? | ? | ? | ? | ? | ? | ? | ? |

|   |   |   |   |   |   |   |   |   |   |   |   |
|---|---|---|---|---|---|---|---|---|---|---|---|
| ? | ? | ? | ? | ? | 0 | ? | 0 | 0 | 0 | ? | ? |
| ? | ? | ? | ? | ? | ? | ? | ? | ? | ? | ? | ? |
| ? | ? | ? | 0 | 0 | ? | ? | ? | 0 | 1 | - | - |
| - | ? | ? | ? | ? | ? | ? | ? | ? | ? | 1 | 0 |
| ? | ? | ? | ? | ? | 0 | 0 | 0 | 4 | 0 | 0 | ? |
| ? | 0 | 0 | 0 | 1 | 0 | 0 | 1 | 0 | 0 | 1 | 0 |
| 3 | 1 | 1 | ? | 0 | 1 | 0 | 0 | 2 | 0 | 3 | 0 |
| 0 | 1 | 5 | 0 | 6 | 0 | 2 | 0 | 1 | 0 | - | - |
| - | 0 | 0 | 3 | 1 | 0 | ? | 1 | 4 | 1 | 0 | 3 |
| 0 | 2 | 0 | 0 | 0 | 0 | ? | ? | ? | 0 | 1 | 1 |
| 2 | 1 | 0 | 0 | 0 | 1 | 1 | 0 | 0 | ? | 0 | 1 |
| ? | 0 | ? | 0 | ? | 1 | 0 | ? | 0 | 0 | 0 | 0 |
| 0 | 0 | 0 | 0 | ? | ? | 2 | 0 | 0 | - | 0 | 0 |
| - | 0 | 0 | 0 | 0 | 0 | 4 | ? | ? | ? | ? | 1 |
| 0 | ? | 1 | ? | ? | ? | ? | ? | ? | ? | ? | ? |
| ? | 0 | ? | 1 | ? | ? | 1 | 0 | 2 | 0 | 0 | ? |
| 0 | - | ? | ? | ? | ? | ? | ? | ? | ? | ? | ? |
| ? | ? | ? | ? | ? | ? | ? | ? | ? | ? | ? | ? |
| ? | ? | ? | ? | ? | ? | ? | ? | ? | ? | ? | ? |
| ? | ? | ? | ? | ? | ? | ? | ? | ? | ? | ? | ? |
| ? | 0 | ? | ? | ? | 3 | ? | 1 | ? | ? | ? | ? |
| 0 | 2 | 0 | 0 | 2 | 0 | 0 | - | ? | 0 | 0 | ? |
| 0 | 0 | ? | ? | ? | 0 | ? | ? | ? | ? | 1 | 0 |
| ? | ? | ? | ? | ? | ? | 0 | 0 | ? | ? | 1 | ? |
| ? | ? | ? | ? | 0 | ? | ? | ? | ? | ? | 0 | ? |
| ? | 0 | 0 |   |   |   |   |   |   |   |   |   |

†*Thaichthys buddhabutrensis*

|   |   |   |   |   |   |   |   |   |   |   |   |
|---|---|---|---|---|---|---|---|---|---|---|---|
| 0 | 0 | ? | 0 | - | 0 | ? | 1 | 2 | 0 | 1 | 0 |
| ? | ? | ? | ? | 0 | ? | ? | ? | 1 | 0 | 1 | ? |
| 1 | 0 | - | 0 | ? | ? | ? | ? | 0 | ? | ? | 1 |
| 1 | 0 | ? | ? | 0 | 0 | 0 | ? | ? | ? | 1 | 0 |
| 1 | ? | 0 | ? | ? | ? | - | ? | ? | 1 | ? | ? |
| ? | ? | ? | 0 | 0 | ? | ? | ? | 2 | 0 | 0 | 1 |
| - | ? | ? | ? | ? | ? | ? | ? | ? | 1 | 0 | ? |
| 1 | ? | ? | 0 | ? | 2 | 0 | 0 | 3 | 0 | 0 | ? |
| ? | 0 | 0 | 1 | 0 | 0 | 0 | 1 | 0 | 1 | 1 | 0 |
| 3 | 1 | 1 | 1 | 0 | 1 | 2 | 0 | 1 | 1 | 4 | 0 |
| 0 | 0 | 2 | 1 | 1 | 1 | 0 | 0 | 0 | 1 | 2 | ? |
| 0 | 0 | ? | ? | ? | ? | ? | ? | ? | ? | 0 | 1 |
| 0 | 0 | 1 | 0 | - | 0 | 0 | 1 | 1 | 0 | 1 | 2 |
| 4 | 1 | 0 | 0 | 0 | 1 | 0 | - | - | 1 | 0 | 1 |
| ? | ? | ? | ? | ? | ? | ? | ? | 0 | 1 | 1 | 0 |
| 0 | 0 | 1 | 0 | ? | ? | 3 | 0 | 0 | 1 | 0 | 0 |
| - | 0 | 0 | 0 | 0 | 0 | 4 | 1 | 1 | 2 | 1 | 1 |
| 1 | 0 | ? | 0 | - | ? | ? | ? | ? | 1 | 2 | 0 |
| 0 | 0 | 0 | 0 | 0 | 0 | ? | - | 0 | 0 | 0 | ? |
| ? | - | ? | ? | ? | ? | ? | ? | ? | ? | ? | ? |
| ? | ? | ? | ? | ? | ? | ? | ? | ? | ? | ? | ? |
| ? | ? | ? | ? | - | - | ? | ? | ? | ? | ? | ? |
| ? | ? | ? | ? | ? | ? | ? | ? | ? | ? | ? | ? |
| ? | ? | ? | ? | ? | 1 | 2 | 0 | ? | 1 | 0 | 0 |

|                             |   |     |   |   |   |   |   |   |   |   |   |
|-----------------------------|---|-----|---|---|---|---|---|---|---|---|---|
| 0                           | 0 | 0   | 0 | ? | 0 | 0 | - | ? | 0 | 0 | 1 |
| 0                           | 0 | 0   | 1 | 0 | 0 | ? | ? | ? | 0 | 1 | 0 |
| 0                           | 2 | 0   | 2 | 1 | ? | 0 | 0 | ? | ? | 2 | 1 |
| ?                           | 4 | 1   | - | 0 | ? | ? | ? | ? | 0 | 0 | 0 |
| 0                           | 0 | 0   |   |   |   |   |   |   |   |   |   |
| † <i>Tharsis dubius</i>     |   |     |   |   |   |   |   |   |   |   |   |
| 0                           | 0 | 1   | 2 | 0 | - | - | - | - | 0 | - | - |
| 1                           | 0 | ?   | ? | 1 | 0 | - | 0 | ? | ? | 3 | 1 |
| 0                           | ? | ?   | ? | 1 | 1 | 1 | 2 | 0 | ? | ? | 1 |
| 0                           | ? | 5   | 1 | 0 | 0 | 0 | 0 | 1 | 0 | 1 | 2 |
| 2                           | 1 | 1   | 0 | ? | 1 | 0 | 0 | ? | 1 | 1 | 0 |
| 0                           | 1 | 0   | 0 | 0 | 1 | 0 | 0 | 2 | 0 | 1 | - |
| 1                           | 0 | 1   | ? | ? | ? | 1 | 1 | 4 | 1 | 0 | 2 |
| 0                           | 1 | 0   | 0 | 3 | 0 | 0 | 0 | 2 | 1 | 1 | ? |
| ?                           | 0 | 0   | 2 | 1 | 1 | 0 | 0 | ? | 2 | 2 | 1 |
| ?                           | 1 | 0   | 0 | 0 | 0 | 3 | - | 0 | 0 | 3 | 0 |
| 0                           | 0 | 1   | 1 | 2 | 1 | 2 | 0 | 0 | 0 | - | - |
| -                           | 0 | 0   | 0 | 0 | 0 | 0 | 2 | 0 | 1 | 1 | - |
| -                           | - | -   | - | - | - | 0 | - | - | 0 | 1 | 0 |
| 2                           | 1 | 1   | 0 | 0 | 2 | 2 | - | 0 | 1 | 1 | 1 |
| 1                           | 0 | 1   | 1 | 1 | 2 | 1 | 1 | 0 | 0 | 0 | 0 |
| 0                           | 0 | 1   | 0 | - | ? | 3 | 0 | 0 | 0 | 1 | 0 |
| -                           | 0 | 1   | 0 | 0 | 2 | 4 | 1 | 1 | 1 | 1 | 1 |
| 1                           | 0 | 1   | 1 | 2 | ? | ? | ? | ? | ? | ? | 0 |
| 1                           | 0 | 0   | 0 | 2 | 0 | 0 | 0 | 1 | 1 | 1 | 0 |
| -                           | 1 | 0   | 0 | 0 | 0 | 0 | 1 | 1 | 1 | 1 | 1 |
| 1                           | 0 | 1   | 1 | 1 | 0 | 1 | 1 | 1 | 1 | 1 | 0 |
| 0                           | 0 | 0   | 1 | 1 | 0 | 2 | 1 | 0 | 0 | 3 | 3 |
| 1                           | 1 | 0   | 0 | 1 | 0 | 0 | 0 | 1 | 1 | 0 | 0 |
| 0                           | 0 | 0   | 1 | 1 | 2 | 3 | ? | 4 | 2 | 1 | 1 |
| 1                           | 3 | 1   | 1 | - | 2 | 1 | 1 | 1 | 1 | 1 | 1 |
| 0                           | 0 | 1   | 1 | 1 | 0 | 0 | 0 | ? | 1 | 1 | 3 |
| 3                           | 0 | 1   | 2 | 0 | 0 | 0 | 0 | 0 | 1 | 3 | ? |
| 0                           | 2 | 1   | - | 0 | 0 | 1 | 1 | 0 | 1 | 0 | 2 |
| 1                           | 0 | 0   |   |   |   |   |   |   |   |   |   |
| † <i>Thrissops formosus</i> |   |     |   |   |   |   |   |   |   |   |   |
| 4                           | 0 | 1   | 2 | ? | - | - | - | - | 0 | - | - |
| 1                           | 2 | 1   | ? | 1 | 1 | 1 | ? | 1 | 0 | ? | ? |
| 0                           | 0 | -   | 0 | ? | ? | ? | 2 | 0 | 1 | 1 | 1 |
| 0                           | 0 | 5   | 1 | 0 | 0 | 0 | 0 | 1 | 0 | 1 | 2 |
| ?                           | 1 | 1   | 0 | 0 | 1 | 0 | 0 | - | 1 | 1 | 0 |
| ?                           | 2 | 1   | 0 | 0 | 0 | 0 | 0 | 2 | 0 | 1 | - |
| 1                           | 0 | 1   | ? | ? | ? | 1 | ? | ? | 1 | 0 | 2 |
| 0                           | ? | 0   | 0 | 3 | 0 | 0 | 0 | 1 | 1 | - | ? |
| 1                           | 0 | ?   | 2 | 0 | 1 | 0 | 0 | 0 | 2 | 2 | ? |
| ?                           | 1 | 0   | 0 | 0 | 1 | 3 | - | 0 | 0 | 3 | 0 |
| 0                           | 0 | 1   | 1 | 1 | 1 | 3 | 0 | 0 | 0 | - | - |
| -                           | 0 | 0   | 0 | 0 | 0 | 1 | ? | ? | 1 | 1 | - |
| -                           | - | -   | - | - | - | 0 | - | - | 0 | 1 | 0 |
| 1                           | 1 | 0&1 | 0 | 0 | 2 | 2 | - | 0 | 1 | 0 | 1 |
| ?                           | 0 | ?   | 1 | 1 | 1 | 0 | 1 | 0 | 0 | 0 | 0 |

|   |   |   |     |   |   |     |   |   |   |   |   |
|---|---|---|-----|---|---|-----|---|---|---|---|---|
| 0 | 0 | 0 | 0   | - | 0 | 3   | 0 | 0 | 0 | 1 | 0 |
| - | 0 | 0 | 0   | 0 | 0 | 4   | 1 | 1 | 0 | 1 | 1 |
| 0 | 0 | 0 | 0   | - | ? | ?   | ? | ? | ? | ? | 0 |
| 1 | 0 | 0 | 0   | 1 | 0 | 0   | 0 | ? | 1 | 1 | 0 |
| - | 1 | 0 | 0   | 0 | 0 | 0   | 0 | 1 | 1 | 1 | 1 |
| 0 | - | 0 | 0   | 0 | 0 | 0&1 | 0 | 0 | 0 | 0 | 0 |
| 0 | 0 | 0 | 1   | 0 | 0 | 2   | 1 | 0 | 0 | 3 | 3 |
| 1 | 1 | 0 | 0&1 | 0 | 0 | 1   | 0 | 1 | 0 | 1 | 0 |
| 0 | 0 | 0 | 1   | 1 | 2 | 1   | ? | 3 | 0 | 1 | 1 |
| 1 | 2 | 1 | 0   | - | 2 | 1   | 1 | 1 | 2 | - | 1 |
| 0 | 1 | 1 | 1   | 1 | 1 | 1   | 2 | 1 | 1 | 1 | 3 |
| 3 | 0 | 1 | -   | 0 | 0 | 0   | 0 | 0 | 1 | 3 | ? |
| 0 | 1 | 1 | -   | 0 | 1 | 1   | ? | 0 | 1 | 0 | ? |
| 1 | ? | 0 |     |   |   |     |   |   |   |   |   |

†*Ticinolepis crassidens*

|   |   |   |   |   |   |   |   |   |   |   |   |
|---|---|---|---|---|---|---|---|---|---|---|---|
| 0 | 0 | 0 | 0 | - | 0 | 0 | 0 | - | 1 | 0 | - |
| ? | ? | ? | ? | 0 | ? | ? | ? | 1 | 0 | ? | 0 |
| ? | ? | ? | ? | ? | ? | ? | ? | 0 | 0 | - | 0 |
| 0 | 0 | 3 | 1 | 0 | 0 | 0 | 0 | 0 | 0 | 1 | 0 |
| ? | ? | 1 | 0 | 0 | 0 | ? | ? | ? | 1 | ? | ? |
| ? | 1 | - | 0 | 0 | ? | 0 | 0 | 2 | 0 | 0 | 1 |
| - | 0 | ? | ? | ? | ? | ? | ? | 0 | ? | ? | ? |
| ? | ? | ? | 0 | ? | 0 | 0 | 0 | ? | 0 | 0 | ? |
| ? | 0 | ? | ? | ? | ? | ? | 0 | 0 | 0 | 0 | 0 |
| 3 | 1 | ? | 0 | 0 | 0 | 1 | 0 | 0 | 0 | 3 | 0 |
| 0 | 0 | 0 | 2 | 5 | 0 | 2 | 0 | 0 | 1 | 1 | 0 |
| 0 | 0 | 0 | 3 | 1 | 0 | 0 | 1 | 0 | 1 | 0 | 3 |
| 1 | 2 | 0 | 0 | 0 | 0 | 0 | ? | ? | 0 | 1 | 1 |
| 3 | 1 | 0 | 0 | 0 | 3 | 1 | 0 | 0 | 1 | 0 | 1 |
| ? | ? | ? | ? | ? | ? | ? | ? | 0 | ? | 2 | 0 |
| 0 | 0 | 0 | 2 | 3 | 3 | 2 | 0 | 0 | - | 0 | 0 |
| - | 0 | 0 | 0 | 0 | 0 | 0 | 1 | 1 | 1 | 1 | 1 |
| 0 | 1 | 3 | 0 | - | ? | ? | ? | ? | ? | ? | ? |
| ? | ? | ? | 0 | ? | 0 | 0 | ? | ? | ? | ? | ? |
| ? | ? | ? | ? | ? | ? | ? | ? | ? | ? | ? | ? |
| ? | ? | ? | ? | ? | ? | 1 | ? | ? | ? | ? | ? |
| ? | ? | ? | ? | ? | ? | ? | ? | ? | ? | ? | ? |
| ? | ? | ? | ? | ? | ? | ? | ? | ? | ? | ? | ? |
| ? | ? | ? | ? | ? | ? | ? | ? | ? | ? | ? | ? |
| ? | 0 | ? | ? | ? | 2 | 1 | 0 | ? | 0 | 1 | 0 |
| 0 | 2 | 0 | 0 | 1 | 0 | 0 | - | ? | 0 | 0 | ? |
| 0 | ? | ? | ? | ? | 0 | ? | ? | ? | ? | 1 | 0 |
| 0 | 0 | 0 | 0 | 0 | 0 | 0 | 1 | 1 | 1 | 2 | 1 |
| 1 | ? | ? | ? | ? | ? | 0 | ? | ? | 0 | 0 | ? |
| 0 | 0 | 0 |   |   |   |   |   |   |   |   |   |

†*Ticinolepis longaeva*

|   |   |   |   |   |   |   |   |   |   |   |   |
|---|---|---|---|---|---|---|---|---|---|---|---|
| 0 | 0 | 0 | 0 | - | 1 | 0 | 0 | - | 1 | 0 | - |
| ? | ? | ? | ? | 0 | ? | ? | ? | 1 | 0 | ? | ? |
| ? | ? | ? | ? | ? | ? | ? | ? | ? | ? | ? | ? |
| ? | 0 | ? | ? | 0 | 0 | ? | 0 | 0 | ? | 1 | 0 |
| 1 | ? | 1 | 0 | ? | ? | ? | 0 | - | 1 | 0 | 0 |
| ? | 1 | 1 | 0 | 0 | ? | ? | ? | 2 | 0 | 0 | 1 |



|   |   |   |     |   |   |   |   |   |   |   |   |
|---|---|---|-----|---|---|---|---|---|---|---|---|
| - | 0 | 0 | ?   | ? | ? | ? | ? | 0 | 1 | 0 | 1 |
| 1 | ? | 0 | 0   | 1 | 0 | 0 | 0 | 1 | 0 | 0 | 1 |
| 0 | 0 | 1 | 2   | 0 | 0 | 1 | 0 | 0 | 0 | 0 | 0 |
| 3 | 1 | 0 | 0   | 0 | 0 | 2 | 0 | 0 | 0 | 3 | 0 |
| 0 | 0 | 0 | 0&1 | 5 | 0 | 2 | 0 | 0 | 1 | 1 | 0 |
| 0 | 0 | 0 | 3   | 1 | 0 | 0 | 1 | 0 | 1 | 0 | 3 |
| 1 | 2 | 0 | 0   | 0 | 0 | 0 | 0 | 0 | 0 | 1 | 1 |
| 3 | 1 | 0 | 0   | 0 | 3 | 1 | 0 | 0 | 1 | 0 | 1 |
| 0 | 1 | 1 | 0   | 0 | 1 | 0 | 0 | 0 | 0 | 2 | 0 |
| 0 | 0 | 0 | 1   | 1 | 1 | 2 | 0 | 0 | - | 0 | 0 |
| - | 0 | 0 | 0   | 0 | 0 | 0 | 1 | 1 | 1 | 1 | 1 |
| 0 | 1 | 3 | 0   | - | ? | ? | ? | ? | 1 | 1 | 1 |
| 0 | ? | ? | 0   | ? | 0 | 0 | ? | ? | ? | ? | ? |
| ? | ? | ? | ?   | ? | ? | ? | ? | ? | ? | ? | ? |
| ? | ? | ? | ?   | ? | ? | ? | ? | ? | ? | ? | ? |
| ? | ? | ? | ?   | ? | ? | ? | ? | ? | ? | ? | ? |
| ? | ? | ? | ?   | ? | ? | ? | ? | ? | ? | ? | ? |
| ? | 0 | ? | ?   | 0 | 1 | 1 | 0 | ? | 0 | 1 | 0 |
| 0 | 2 | 0 | 0   | 1 | 0 | 0 | - | ? | 0 | 0 | ? |
| 0 | 0 | ? | ?   | 1 | 0 | 0 | ? | ? | 1 | 1 | 0 |
| 0 | 2 | 0 | 0   | 0 | 0 | 0 | 1 | 1 | 0 | 2 | 1 |
| 1 | 4 | 1 | -   | ? | ? | 0 | 0 | 0 | 0 | 0 | 0 |
| 0 | 0 | 0 |     |   |   |   |   |   |   |   |   |

†*Tlayuamichin itzli*

|   |   |   |   |   |     |   |   |   |   |   |   |
|---|---|---|---|---|-----|---|---|---|---|---|---|
| 0 | 0 | 0 | 0 | - | 2   | 0 | 1 | 2 | 0 | 1 | 0 |
| ? | ? | ? | ? | 0 | ?   | ? | ? | ? | ? | ? | ? |
| ? | ? | ? | ? | ? | ?   | ? | ? | ? | ? | ? | ? |
| ? | ? | ? | ? | 1 | 0   | ? | ? | ? | ? | 1 | 0 |
| ? | 1 | 1 | ? | ? | ?   | ? | 0 | - | 1 | 0 | ? |
| 0 | 1 | 0 | 0 | 0 | 1   | 0 | 0 | 4 | 0 | 0 | 1 |
| - | 0 | ? | ? | ? | ?   | ? | ? | 3 | ? | 0 | ? |
| ? | ? | ? | ? | ? | 1&2 | 0 | 0 | 4 | 0 | 0 | ? |
| ? | 0 | 0 | 0 | 1 | 1   | 0 | 1 | ? | 5 | 1 | 0 |
| ? | 1 | 1 | 0 | 0 | 0   | 0 | 0 | 0 | 2 | 3 | 0 |
| 0 | 0 | 0 | 2 | 7 | 0   | 0 | 0 | 0 | 1 | 6 | 2 |
| 0 | 0 | 0 | 3 | 1 | 0   | 0 | 1 | ? | 1 | 0 | 2 |
| 0 | 0 | 0 | 1 | 0 | 0   | 0 | 1 | 1 | 0 | 1 | 1 |
| 4 | 3 | 0 | 0 | 0 | 1   | 1 | 0 | 0 | 1 | 0 | 1 |
| 0 | 1 | ? | 0 | ? | 1   | 1 | ? | 0 | 0 | 2 | 1 |
| 0 | 0 | 0 | 2 | ? | 2   | 2 | 0 | 1 | - | 0 | 0 |
| - | 0 | 1 | 0 | 0 | 0   | 1 | 1 | 1 | 3 | 1 | 1 |
| 0 | 1 | 3 | 0 | - | ?   | ? | ? | ? | ? | ? | 0 |
| 3 | 0 | 1 | 0 | ? | 0   | 0 | ? | ? | ? | ? | ? |
| ? | ? | ? | ? | ? | ?   | ? | ? | ? | ? | ? | ? |
| ? | ? | ? | ? | ? | ?   | ? | ? | ? | ? | ? | ? |
| ? | ? | ? | ? | ? | ?   | ? | ? | ? | ? | ? | ? |
| ? | ? | ? | ? | ? | ?   | ? | ? | ? | ? | ? | ? |
| ? | ? | ? | ? | ? | ?   | ? | ? | ? | ? | ? | ? |
| ? | ? | ? | ? | ? | 3   | 3 | 1 | ? | 2 | ? | ? |
| 0 | 0 | 0 | 0 | 1 | 0   | 0 | - | ? | 0 | 0 | ? |
| 0 | ? | ? | ? | 0 | 0   | ? | ? | ? | ? | 1 | 2 |
| 1 | 2 | 0 | 2 | 1 | 1   | 0 | 0 | 1 | ? | 2 | ? |

|                               |   |   |   |   |   |   |   |   |   |   |   |
|-------------------------------|---|---|---|---|---|---|---|---|---|---|---|
| 1                             | 4 | ? | ? | ? | ? | 0 | ? | 0 | 0 | 0 | ? |
| 0                             | 0 | 0 |   |   |   |   |   |   |   |   |   |
| † <i>Varasichthys ariasi</i>  |   |   |   |   |   |   |   |   |   |   |   |
| 0                             | 0 | 1 | 2 | 1 | - | - | - | - | 0 | - | - |
| ?                             | ? | ? | ? | 1 | 0 | - | ? | 0 | - | 3 | 2 |
| 0                             | ? | ? | 0 | 1 | ? | ? | 2 | 0 | ? | ? | ? |
| 0                             | 0 | ? | ? | 0 | ? | 0 | 0 | 1 | ? | ? | ? |
| ?                             | 3 | ? | 0 | 0 | 1 | ? | 0 | - | ? | ? | ? |
| ?                             | ? | ? | 0 | 0 | ? | ? | ? | 1 | 0 | 1 | - |
| ?                             | ? | 1 | ? | ? | ? | 1 | ? | ? | 1 | 0 | 2 |
| 0                             | 0 | ? | ? | ? | 0 | 2 | 0 | 3 | 1 | ? | ? |
| ?                             | 0 | 0 | 2 | ? | ? | 0 | 0 | 0 | 2 | 2 | ? |
| ?                             | 1 | ? | 0 | 0 | 0 | 3 | - | 0 | - | ? | ? |
| ?                             | ? | 1 | 1 | 8 | 1 | 2 | 0 | 0 | 0 | - | - |
| -                             | 0 | 0 | 0 | 0 | 0 | 0 | ? | ? | 1 | 0 | 0 |
| -                             | - | 0 | 0 | - | 0 | 0 | - | - | 0 | 1 | 0 |
| 1                             | 1 | 1 | 0 | 0 | ? | 2 | - | 0 | 1 | 1 | 1 |
| 1                             | 0 | 3 | 0 | 1 | 1 | 0 | 1 | 0 | ? | 0 | 0 |
| 0                             | ? | 1 | 0 | - | ? | 3 | 0 | 0 | 0 | 1 | 0 |
| -                             | 0 | 0 | 0 | 0 | 2 | 4 | ? | ? | ? | 1 | 1 |
| 0                             | 0 | 1 | 1 | 2 | ? | ? | ? | ? | ? | ? | 0 |
| 0                             | 0 | 0 | 0 | 2 | 0 | ? | 0 | 1 | 1 | 1 | ? |
| -                             | 1 | ? | 0 | ? | 0 | 0 | ? | ? | ? | ? | 1 |
| 1                             | 0 | 1 | 0 | 0 | 0 | 0 | 1 | 1 | 0 | 0 | ? |
| ?                             | ? | 0 | 0 | 0 | 0 | 2 | 1 | 0 | 0 | 3 | ? |
| 1                             | 3 | 0 | 0 | 0 | 0 | 1 | 0 | 1 | 1 | 0 | 0 |
| 0                             | 0 | 0 | ? | 1 | 1 | 3 | ? | 3 | 2 | ? | 1 |
| 1                             | 2 | 1 | 1 | - | 2 | 1 | ? | ? | 1 | 1 | 1 |
| 1                             | 1 | 1 | 1 | ? | 1 | 1 | 0 | 1 | 1 | 1 | 3 |
| ?                             | ? | 1 | 2 | ? | ? | ? | 0 | 0 | 2 | 3 | ? |
| ?                             | 5 | ? | ? | 0 | 0 | 0 | ? | 0 | 1 | 1 | 2 |
| 1                             | 0 | 1 |   |   |   |   |   |   |   |   |   |
| † <i>Vidalamia catalunica</i> |   |   |   |   |   |   |   |   |   |   |   |
| 3                             | 0 | 0 | 1 | - | - | - | - | - | 0 | - | - |
| ?                             | ? | ? | ? | 0 | ? | ? | ? | ? | ? | ? | ? |
| ?                             | 1 | 0 | 0 | ? | ? | ? | ? | ? | ? | ? | 1 |
| ?                             | ? | ? | 1 | 1 | 0 | ? | 0 | 0 | 0 | ? | ? |
| 1                             | 2 | 0 | 0 | ? | ? | - | 1 | 1 | ? | ? | ? |
| 0                             | ? | 1 | 0 | 0 | ? | ? | ? | ? | 0 | 1 | - |
| 0                             | ? | ? | ? | ? | ? | 0 | ? | 2 | 1 | 1 | 0 |
| 1                             | ? | 0 | 0 | ? | 0 | 0 | 0 | 1 | 0 | 0 | ? |
| ?                             | 0 | 0 | 0 | 1 | 2 | 1 | 0 | 0 | ? | 1 | 0 |
| ?                             | 1 | 0 | 0 | 0 | ? | ? | ? | 0 | 0 | ? | 3 |
| 0                             | 1 | 3 | 0 | 2 | ? | 2 | ? | 0 | 0 | - | - |
| -                             | 0 | 0 | ? | ? | 0 | 0 | 1 | 4 | 1 | 1 | - |
| -                             | - | - | - | - | - | 0 | ? | ? | 0 | 1 | 1 |
| ?                             | 1 | 0 | 1 | 2 | 1 | 1 | 1 | 0 | 0 | 0 | 1 |
| 0                             | 1 | ? | 0 | 0 | 1 | 0 | 0 | 0 | 0 | 0 | 0 |
| 0                             | 0 | 0 | 4 | 0 | 0 | 2 | 0 | 0 | - | 0 | 0 |
| -                             | 0 | 0 | 0 | 0 | 3 | 2 | 1 | ? | ? | 1 | 1 |
| ?                             | 1 | 1 | 1 | 0 | ? | 1 | ? | ? | 1 | 0 | 1 |

|   |   |   |   |   |   |   |   |   |   |   |   |
|---|---|---|---|---|---|---|---|---|---|---|---|
| ? | 0 | ? | 0 | 1 | 0 | 0 | 0 | 2 | 0 | 0 | 1 |
| 2 | - | 0 | 1 | 0 | 0 | 0 | 1 | ? | ? | ? | 0 |
| 0 | - | 0 | 0 | 0 | 0 | 0 | 0 | 0 | 1 | 1 | 0 |
| 0 | 0 | 0 | 0 | 0 | 0 | 0 | 0 | 0 | ? | 3 | 3 |
| 1 | 3 | 1 | 0 | 0 | 0 | 0 | 0 | 0 | - | - | ? |
| - | 1 | 1 | 0 | 0 | 3 | 0 | ? | 2 | 0 | 0 | 0 |
| 0 | 2 | 1 | 0 | - | 1 | 0 | 2 | ? | 2 | ? | 1 |
| 1 | 2 | 0 | 1 | 1 | 0 | ? | 0 | ? | ? | 1 | 3 |
| ? | 0 | 1 | - | 0 | 0 | 1 | ? | ? | ? | 1 | 0 |
| 1 | ? | 1 | - | 0 | ? | 0 | 0 | ? | 1 | 0 | 1 |
| 1 | 0 | 0 |   |   |   |   |   |   |   |   |   |

†*Watsonulus eugnathoides*

|   |   |   |   |   |   |   |   |   |   |   |   |
|---|---|---|---|---|---|---|---|---|---|---|---|
| 1 | 0 | 0 | 0 | - | 1 | 0 | ? | ? | 0 | 0 | - |
| 1 | 3 | 0 | ? | 0 | - | - | ? | 0 | - | ? | 0 |
| 0 | 0 | - | 0 | 0 | 1 | 0 | ? | 0 | 0 | - | 0 |
| ? | ? | ? | 1 | 1 | 0 | 0 | 0 | 0 | 0 | 1 | 0 |
| 1 | 1 | 0 | 0 | 0 | 0 | 0 | 1 | 1 | 1 | 0 | 0 |
| 0 | ? | 1 | 0 | 0 | 0 | 0 | 1 | 0 | 0 | 0 | 0 |
| - | ? | 0 | ? | ? | ? | 0 | ? | 2 | ? | 1 | 0 |
| 1 | 0 | 0 | 0 | 0 | 0 | 0 | 0 | 0 | 0 | 0 | ? |
| 0 | 0 | 1 | 2 | 0 | 1 | 1 | 0 | 0 | 0 | 1 | 0 |
| ? | 1 | 0 | 0 | 0 | 1 | 2 | 0 | 0 | 0 | 3 | 0 |
| 0 | 0 | 0 | 0 | 8 | 0 | 2 | 0 | 0 | 0 | - | - |
| - | 0 | 0 | 2 | 1 | 0 | ? | 1 | 0 | 1 | 0 | - |
| - | - | - | - | - | - | 0 | 0 | 0 | 0 | 1 | 1 |
| 0 | 1 | 0 | 1 | 1 | 2 | 1 | 0 | 0 | 1 | 0 | 1 |
| 0 | 1 | 1 | 0 | 0 | 1 | 0 | 0 | 0 | 0 | 0 | 0 |
| 0 | 0 | 0 | 0 | 0 | 0 | 1 | 0 | - | - | 0 | 0 |
| - | 0 | 0 | 0 | 0 | 0 | ? | 1 | 2 | ? | 0 | 1 |
| 0 | 1 | 2 | 1 | 0 | ? | ? | ? | ? | 1 | 0 | 0 |
| 0 | 0 | ? | 1 | ? | 0 | 0 | - | 0 | 0 | 0 | - |
| - | - | ? | ? | ? | ? | ? | ? | 1 | ? | ? | ? |
| ? | ? | ? | ? | ? | ? | ? | ? | ? | ? | ? | ? |
| ? | ? | ? | ? | - | - | ? | ? | ? | ? | ? | ? |
| ? | ? | ? | ? | 0 | ? | 0 | ? | ? | ? | ? | ? |
| ? | 0 | ? | ? | ? | 1 | ? | 0 | ? | 0 | ? | 0 |
| 0 | 2 | 0 | 0 | ? | 0 | ? | - | ? | 0 | 0 | 1 |
| 0 | ? | ? | ? | ? | 0 | ? | ? | ? | ? | 1 | 0 |
| 0 | ? | 0 | 0 | 0 | ? | 0 | 1 | ? | ? | 2 | 1 |
| 1 | 3 | 0 | 0 | 0 | ? | ? | ? | ? | 0 | 0 | ? |
| 0 | 0 | 0 |   |   |   |   |   |   |   |   |   |
