# Supplementary material for: Neopterygian phylogeny: the merger assay
Source: PubMed Central journal article supplement (PMC5882744; doi:10.1098/rsos.172337), 2018-03-21

## **Supplementary File S3. Branch support values obtained for the cladistic analyses.**

**to**

### **Neopterygian Phylogeny: the merger assay**

Adriana López-Arbarello\*, and Emilia Sferco

Department of Earth- and Environmental Sciences, Palaeontology and Geobiology and GeoBio-Center, Ludwig Maximilian University, Richard-Wagner-Strasse 10, D-80333 Munich, Germany ([a.Lopez-Arbarello@lrz.uni-muenchen.de](mailto:a.Lopez-Arbarello@lrz.uni-muenchen.de))

CICTERRA-CONICET-UNC. Av. Velez Sarsfield 1611, X0516GCA, Córdoba, Argentina.

The cladistic analyses were performed with TNT under equal and implied weighting. The weighting strength was determined by using K-values of 3 and 8. Branch support was evaluated also with TNT applying bootstrap expressed as values of GC (groups present/contradicted) through 10000 replicates and calculating Bremer decay indexes for each node. Support measurements were calculated for implied (K=8 and K=3) and equal weighting analyses.

Equal weighting analyses:

Bremer supports (from 3720477 trees, cut 0)

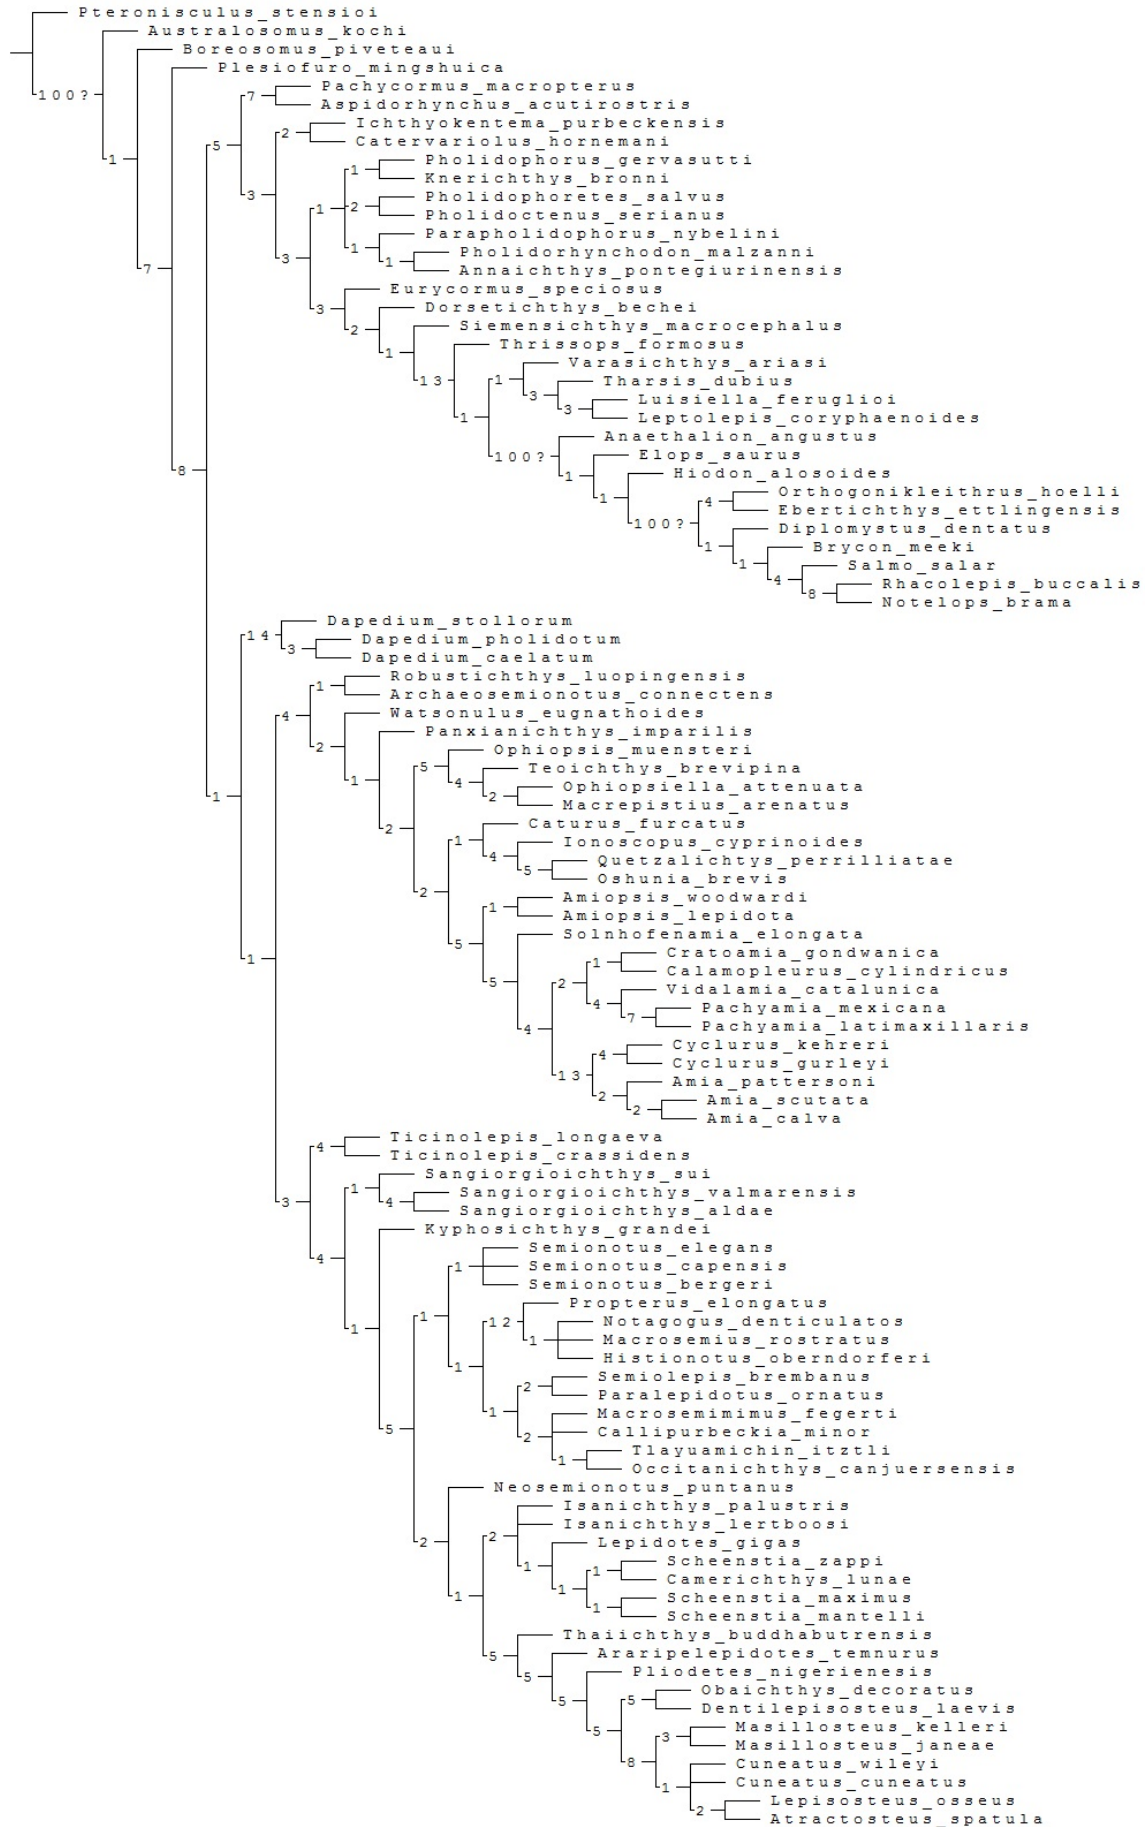

# Equal weighting analyses:

GC values, 10000 replicates, cut=1 (tree 0) - Standard Bootstrap

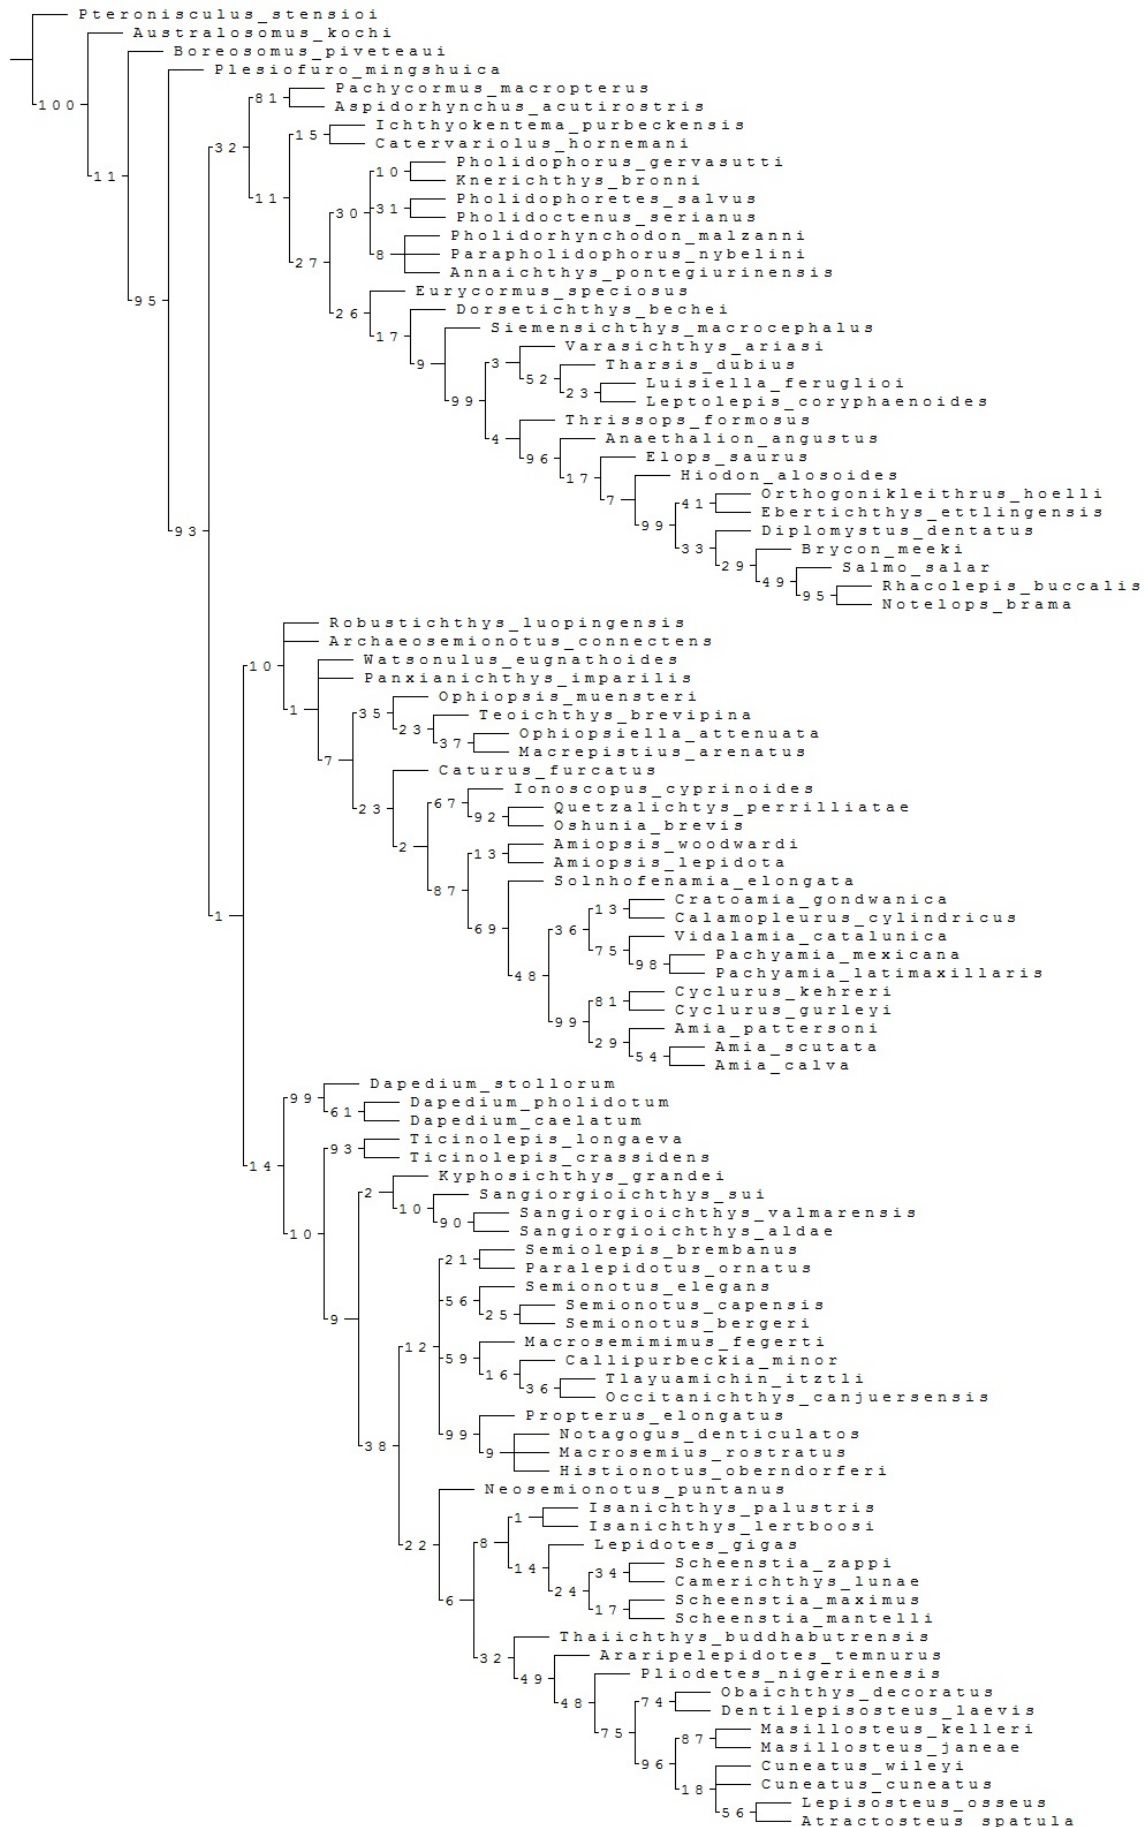

# Implied weighting analyses (K = 3):

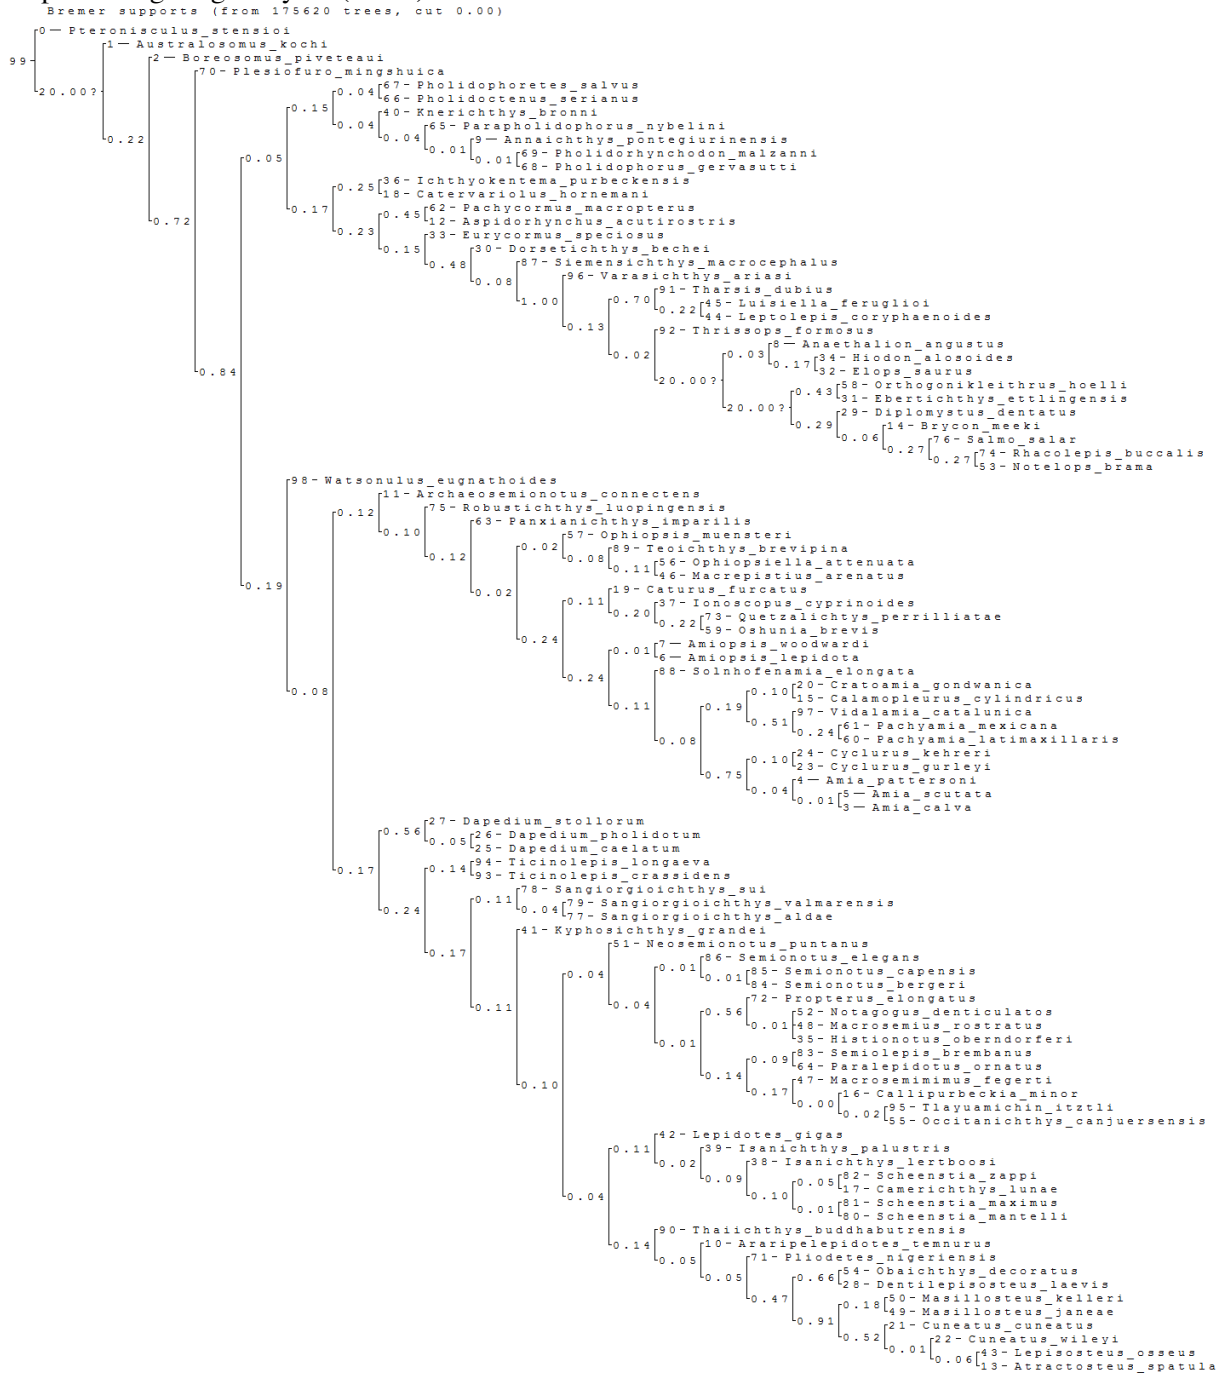

# Implied weighting analyses (K = 3):

GC values, 1000 replicates, cut=1 (tree 0) - Standard Bootstrap

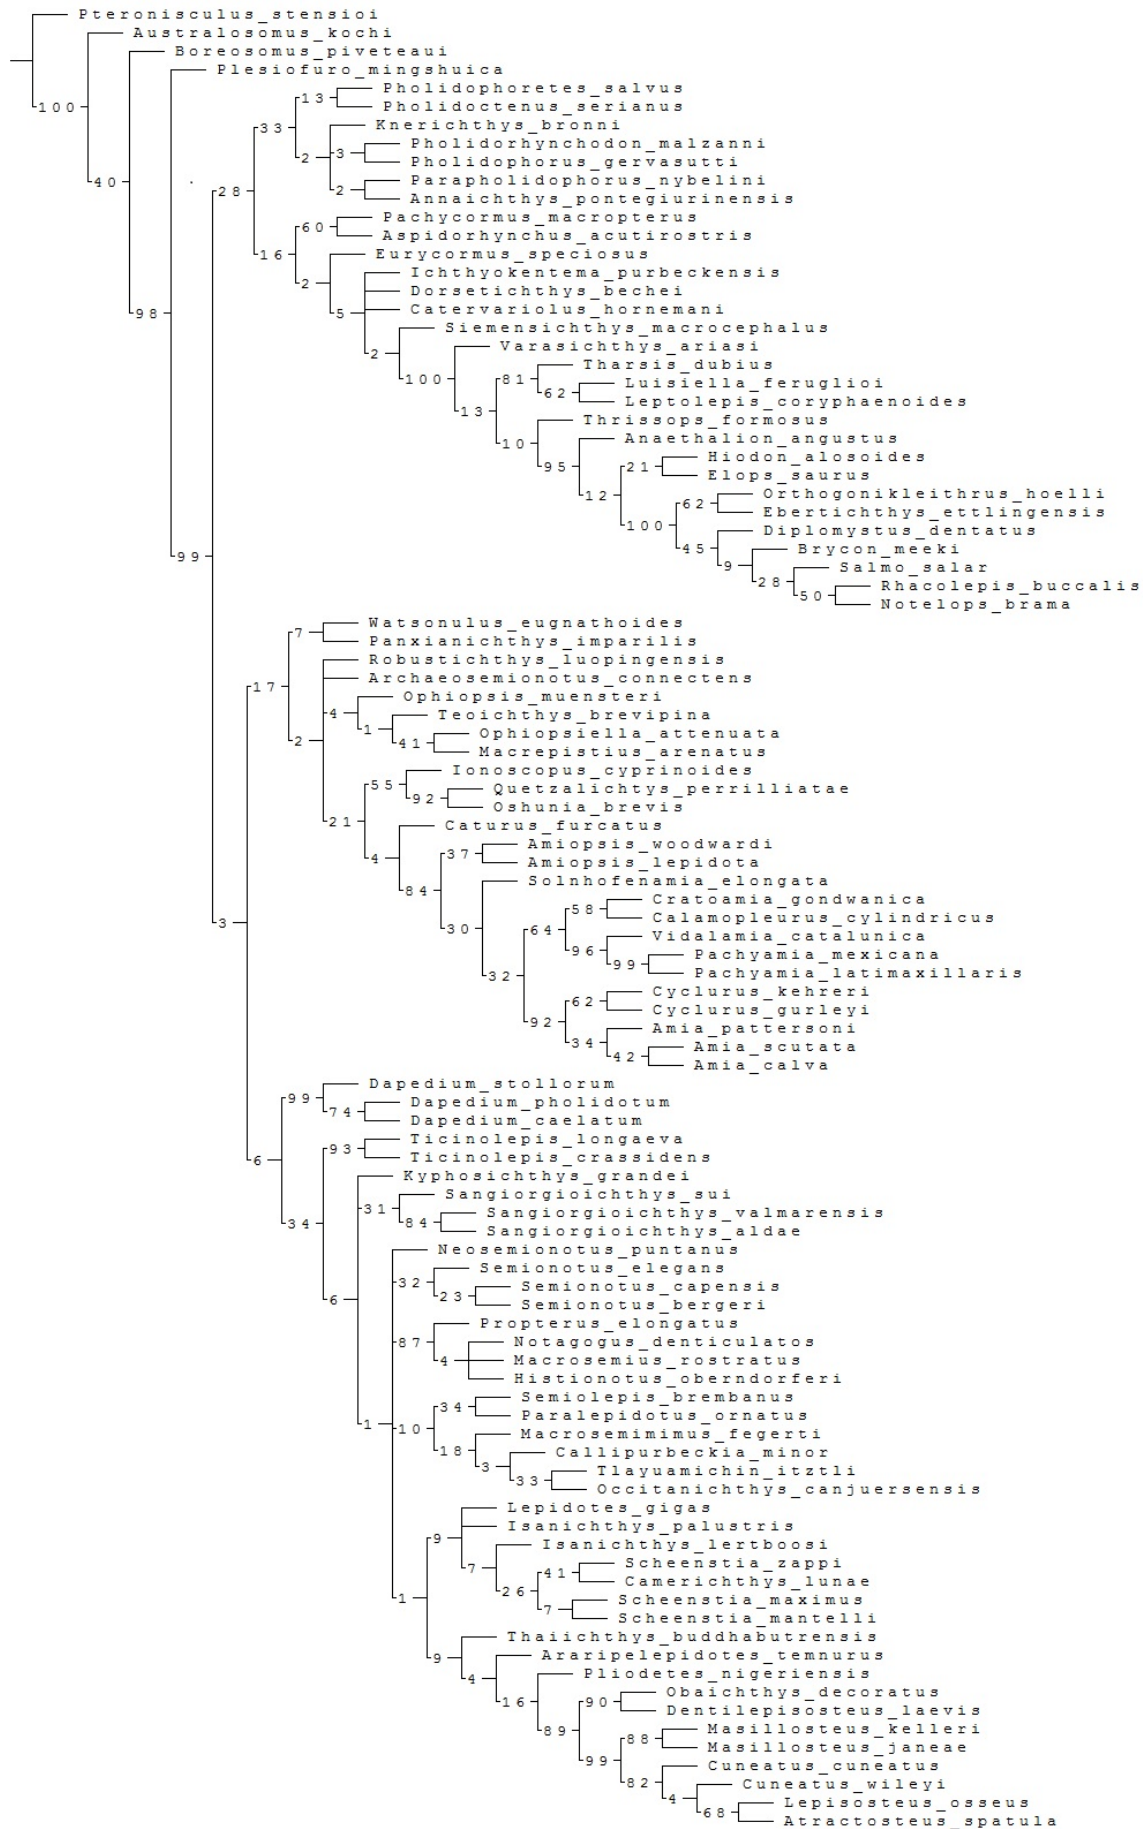

# Implied weighting analyses (K = 8):

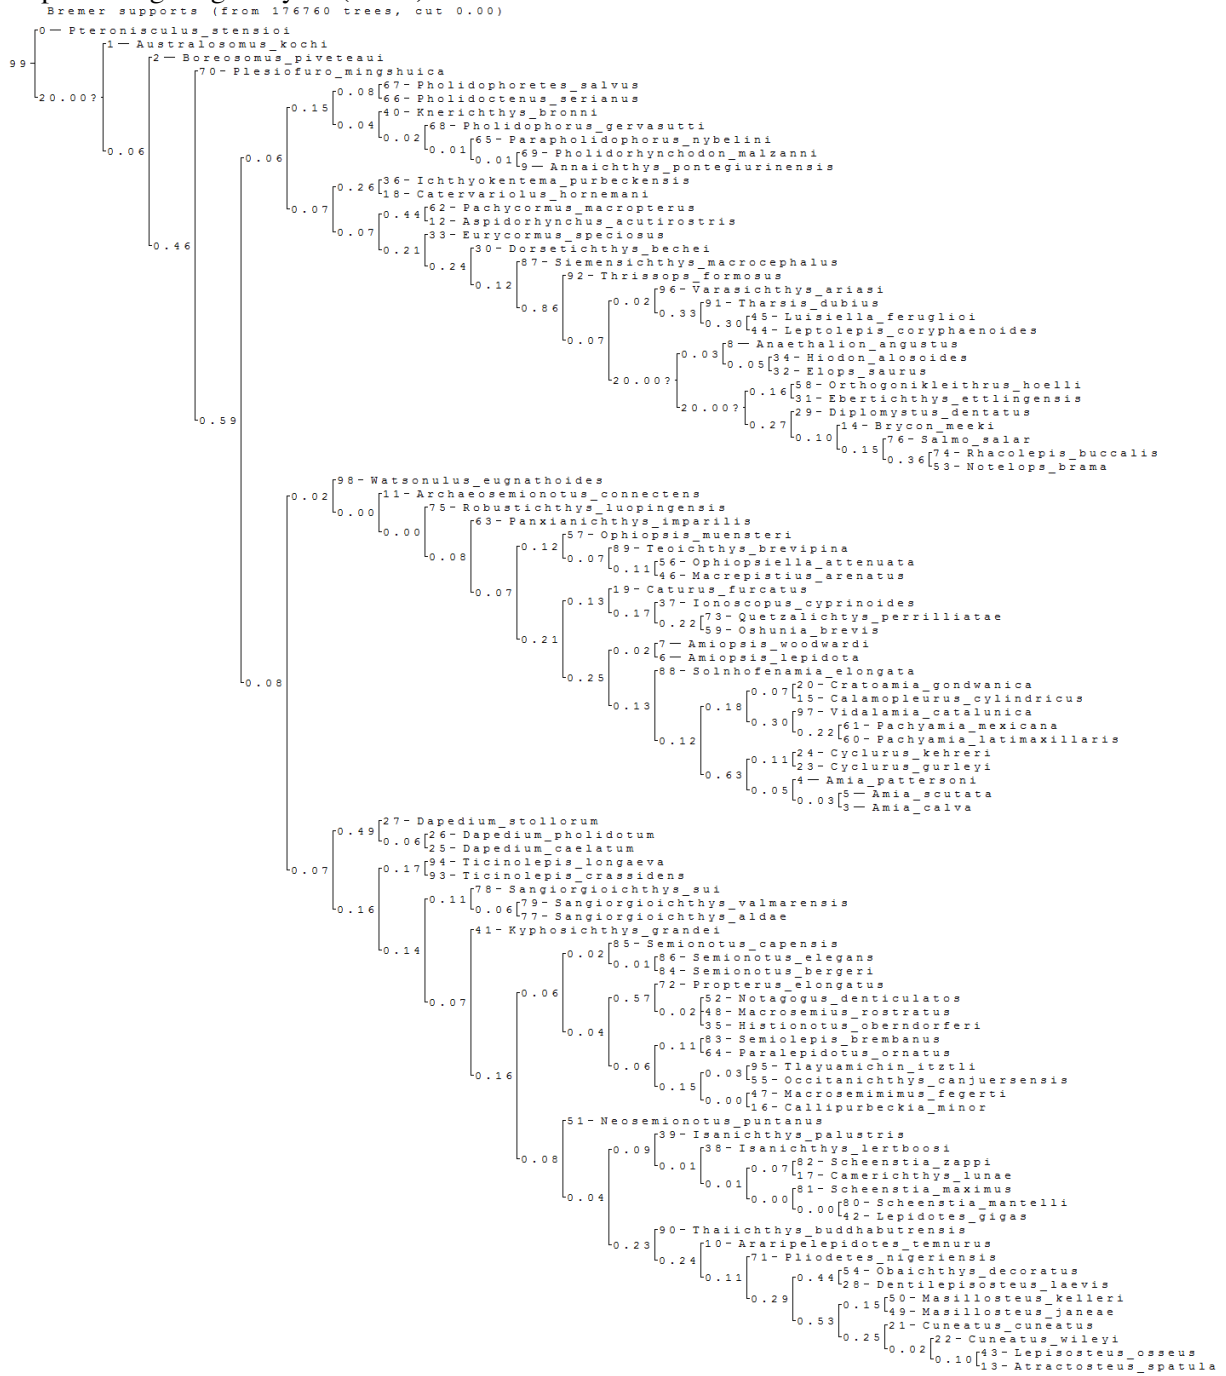

# Implied weighting analyses (K = 8):

GC values, 1000 replicates, cut=1 (tree 0) - Standard Bootstrap

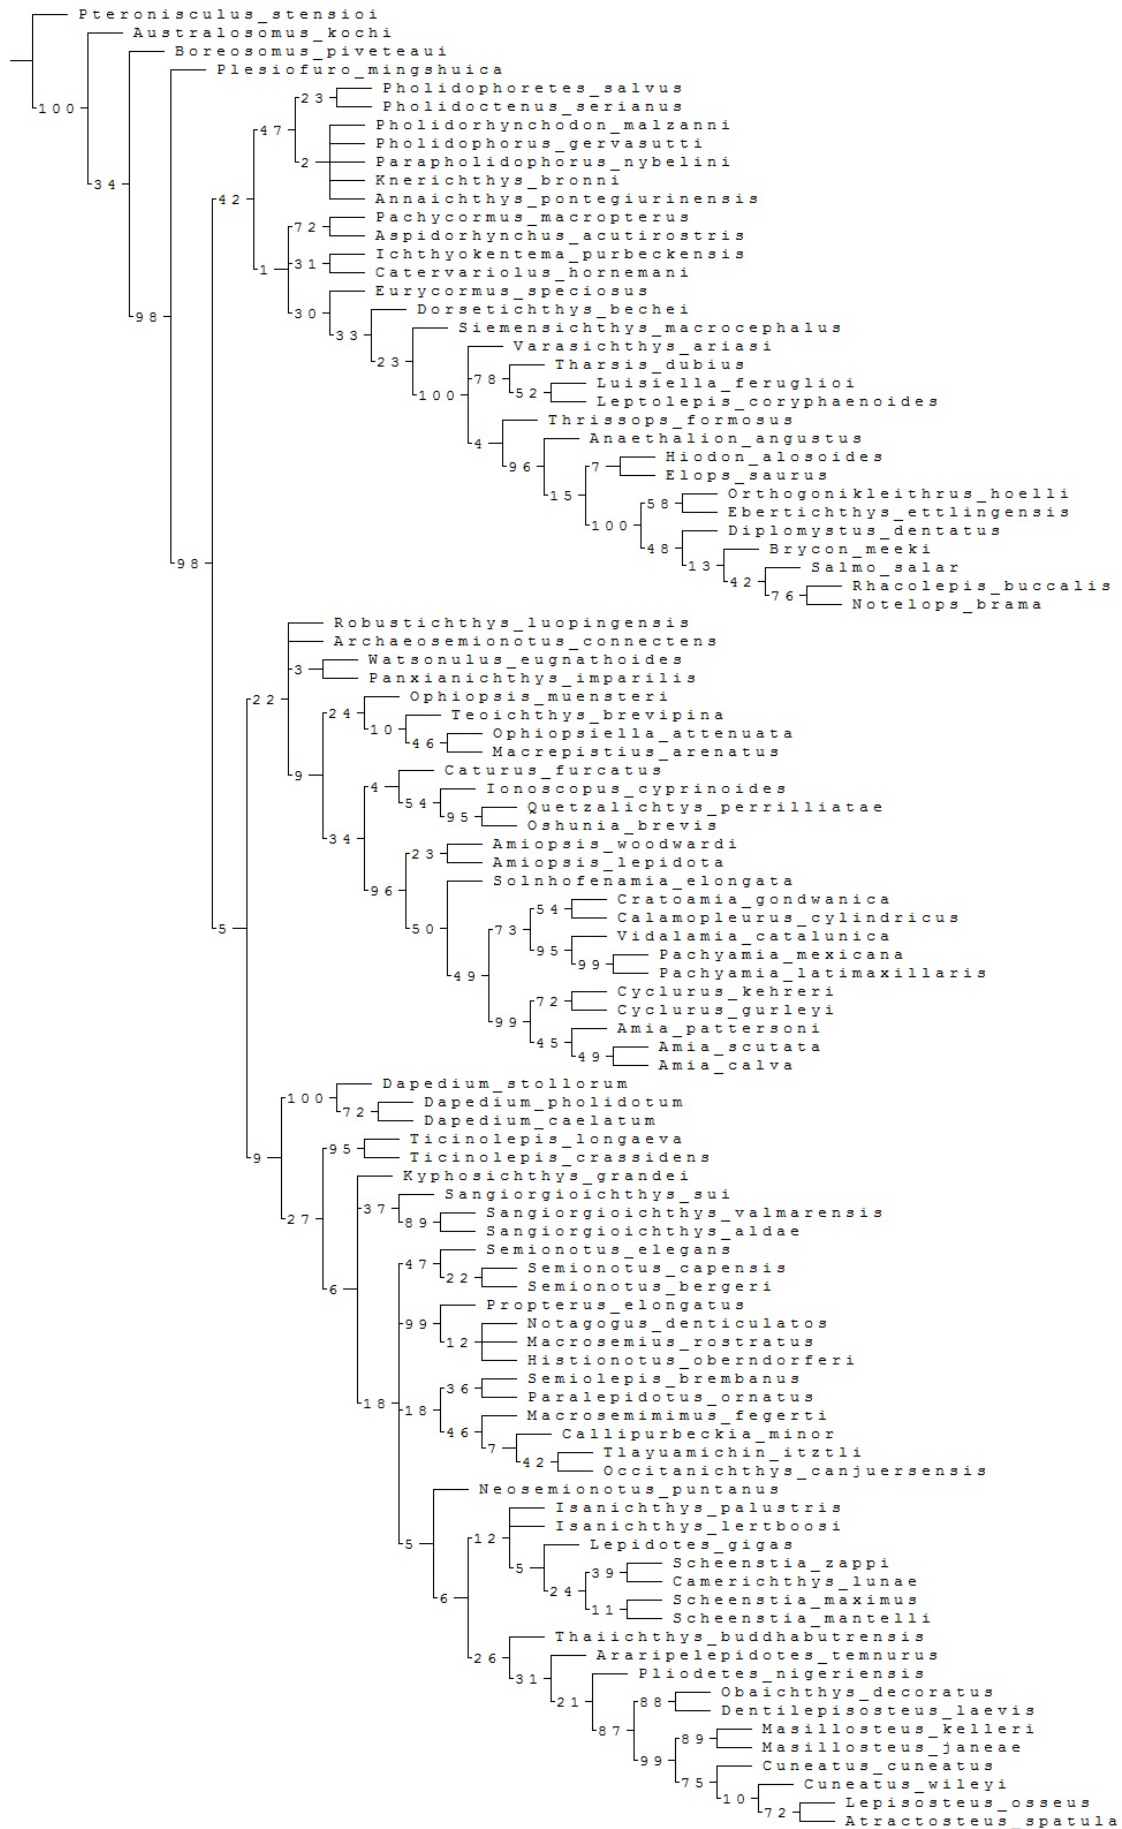

Supplement: rsos172337supp3.pdf [file rsos172337supp3.pdf]
