# Supplementary material for: Neopterygian phylogeny: the merger assay
Source: PubMed Central journal article supplement (PMC5882744; doi:10.1098/rsos.172337), 2018-03-21
Supplement: rsos172337supp4.pdf [file rsos172337supp4.pdf]

### **Crown-Neopterygii (Node 115):**

#### *Uniquely derived synapomorphies*

- 1) Absence of postrostral bone (Char. 142: 0 --> 1)
- 2) Maxilla detached from preopercle (Char. 155: 0 --> 1)
- 3) Maxilla elongate and shallow (Char. 158: 0 --> 1)
- 4) Presence of supramaxilla (Char. 163: 0 --> 1)
- 5) Lower jaw with coronoid process (Char. 168: 0 --> 1)
- 6) Subopercle with ascending process (Char. 200: 0 --> 1)
- 7) Presence of interopercle (Char. 204: 0 --> 1)

#### *Homoplastic synapomorphies*

- 8) Absence of longitudinal articulation of scales (Char. 8: 1 --> 0)
- 9) Slightly concave ventral margin of maxilla (Char. 159: 3 --> 2)
- 10) Dorsal margin of maxilla generally straight or convex (Char. 162: 0 --> 1)
- 11) Dentary forming a well-developed process extending beyond the coronoid process (Char. 166: 0 --> 1)

### **Holostei (Node 114):**

#### *Homoplastic synapomorphies*

- 1) Presence of four or more suborbital bones (Char. 144: 01 --> 3)
- 2) Presence of a presupracleithrum (Char. 319: 0 --> 1)

#### *Potential synapomorphies*

- 1) Four hypobranchials (211[1]; only in †*Pachycormus macrocephalus* outside Holostei)
- 2) Lateral dermethmoids forming the nasal processes of the premaxilla (48[0]; unique of Holostei)

### **†*Dapedium* (Node 164):**

#### *Homoplastic synapomorphies*

- 1) Dorsal fin originating posterior to insertion of pelvic and extending backwards up to end of anal fin (Char. 1: 0 --> 5)
- 2) More than two pairs of extrascapulars (Char. 90: 0 --> 2)
- 3) Large supraorbital bones (Char. 117: 0 --> 1)
- 4) Large, keystone shaped dermosphenotic (Char. 119: 3 --> 4)
- 5) Edentulous maxilla (Char. 180: 0 --> 1)
- 6) Dentary tooth row present only on the anterior one third or less of dentary (Char. 183: 0 --> 1)
- 7) High, bluntly pencil like dentary teeth (Char. 184: 0 --> 2)
- 8) L-shape preopercle (Char. 187: 2 --> 3)
- 9) Suborbital bones completely overlap the dorsal limb of preopercle (Char. 194: 0 --> 1)
- 10) Convexly rounded caudal fin web (Char. 277: 0 --> 1)
- 11) One unbranched ray forming the ventral margin of the caudal fin (Char. 285: 0 --> 2)
- 12) 21 to 34 dorsal fin rays (Char. 300: 0 --> 1)
- 13) Bow-shaped or straight anal fin (Char. 306: 0 --> 2)
- 14) Low posttemporal, approximately as high as the dermopterotic (Char. 316: 0 --> 1)
- 15) Blunt anterior process of posttemporal (Char. 317: 0 --> 1)

### **Node 163:**

#### *Homoplastic synapomorphies*

- 1) Ganoid scales with smooth posterior margin (Char. 6: 1 --> 0)
- 2) One hypaxial procurrent caudal fin ray (Char. 289: 2 --> 1)
- 3) 20 to 35 anal fin rays (Char. 305: 0 --> 1)

### **Ginglymodi + Halecomorphi (Node 113):**

#### *Uniquely derived synapomorphies*

- 1) Antorbital bone with tapering canal bearing anterior arm (Char. 137: 0 --> 1)

#### *Homoplastic synapomorphies* (\*=derived only within this clade)

- 2) \*Supramaxillary notch (Char. 162: 1 --> 3)
- 3) \*Branchiopercle (Char. 206: 0 --> 1)

- 4) Exposed surface of dermopterotic extending anterior to parietals by more than 40% but less than 50% of its total length (Char. 93: 3 --> 1)
- 5) Nasal bones not excavated by the posterior nostril (Char. 109: 0 --> 3)
- 6) Two supraorbital bones (Char. 115: 3 --> 2)
- 7) Maxilla with straight ventral margin (Char. 159: 2 --> 0)

*Potential synapomorphies*

- 1) Relatively small rostral, approximately rectangular to tube-like

**Ginglymodi *sensu* López-Arbarello (2012) (Node 137):**

*Uniquely derived synapomorphies*

- 1) Splint-like quadratojugal (Char. 72: 0 --> 1)
- 2) Anterior infraorbital bones (Char. 130: 0 --> 1)

*Homoplastic synapomorphies*

- 3) Ectopterygoid approximately crescent shape, convex dorsally, concave ventrally (Char. 62: 0 --> 1)
- 4) Antorbital bone excluded from the margin of the orbit (Char. 139: 1 --> 0)
- 5) Subopercle less than half the depth of the opercle (Char. 203: 0 --> 1)
- 6) Absence of gulars (Char. 208: 1 --> 0)

**†*Ticinolepis* (Node 190):**

*Uniquely derived synapomorphies*

- 1) The largest circumborbital bone is the infraorbital placed at the centre of the ventral margin of the orbit (Char. 125: 1 --> 5)

*Homoplastic synapomorphies*

- 2) Squamation of the ventrum made of numerous horizontal rows of distinctly shallow scales (Char. 10: 0 --> 1)
- 3) A mosaic of numerous suborbital bones (Char. 146: 0 --> 2)
- 4) Largest premaxillary teeth are smaller than dentary teeth (Char. 179: 0 --> 2)
- 5) Dorsal processes on the bases of innermost principal caudal fin rays (Char. 286: 0 --> 1)

**(†*Sangiorgioichthys*, more derived ginglymodians) (Node 136):**

*Uniquely derived synapomorphies*

- 1) Dorsal ridge of scales between the skull and the dorsal fin (Char. 11: 0 --> 1)
- 2) Anterior ceratohyal, deeply hourglass shape, without Beryciform foramen (Char. 81: 0 --> 3)

*Homoplastic synapomorphies*

- 3) Exposed area of dermopterotic not extending anterior to parietal (Char. 93: 1 --> 4)
- 4) Long and narrow nasal bones with anterior end incurved laterally (Char. 106: 0 --> 5)
- 5) Large premaxillary nasal processes, completely enclosing the olfactory fenestra (Char. 152: 0 --> 1)
- 6) Presupracleithrum absent (Char. 319: 1 --> 0)

**†*Sangiorgioichthys* (Node 187):**

*Uniquely derived synapomorphies*

- 1) Quadrate laterally covered by one or two suborbitals forming a triangular plate (Char. 150: 0 --> 1)

*Homoplastic synapomorphies*

- 2) Only one anterior infraorbital bone (Char. 131: 1 --> 0)
- 3) Dorsal margin of the maxilla gently concave allocating supramaxilla (Char. 162: 3 --> 2)
- 4) Coronoid process of the lower jaw is completely formed by the surangular (Char. 169: 0 --> 2)

**(†*Sangiorgioichthys aldae*, †*Sangiorgioichthys valmarensis*) (Node 186):**

*Homoplastic synapomorphies*

- 1) Ratio of frontals in adult sized individuals equal or larger than three (Char. 101: 0 --> 1)
- 2) Frontals tapering gradually (Char. 102: 0 --> 1)
- 3) Subinfraorbitals subrectangular, a quarter to half the size of the orbit (Char. 127: 2 --> 3)
- 4) Tooth row is present on only the anterior one third or less of dentary (Char. 183: 0 --> 1)

**(† *Kyphosichthys grandei*, more derived ginglymodians) (Node 135):**

*Homoplastic synapomorphies*

- 1) Longitudinal articulation of the scales of the body (Char. 8: 0 --> 1)
- 2) Subinfraorbitals subrectangular to triangular, about 1,5 to 2,5 times deeper than long (Char. 127: 2 --> 0)
- 3) Loss of branchiopercle (Char. 206: 1 --> 0)
- 4) Low posttemporal bone, approximately as high as the dermopterotic (Char. 316: 0 --> 1)

**Neoginglymodi (Node 134):**

*Homoplastic synapomorphies*

- 1) Dermal bones of the skull smooth or very slightly ornamented (Char. 3: 0 --> 1)
- 2) Absence of an ossified sclerotic ring (Char. 111: 0 --> 1)
- 3) Dorsal margin of maxilla generally straight or convex (Char. 162: 3 --> 1)
- 4) Separate retroarticular bone (Char. 174: 0 --> 1)
- 5) Absence of hypaxial procurent caudal fin rays (Char. 289: 2 --> 0)
- 6) First principal anal fin ray branched (Char. 309: 1 --> 0)
- 7) Stout and increasing up to relatively high basal fulcra in the dorsal fin, higher than the basal segment of the first dorsal fin ray (Char. 311: 0 --> 2)

**†Semionotiformes *sensu* López-Arbarello (2012) (Node 155):**

*Homoplastic synapomorphies*

- 1) Absence of intercalar (Char. 33: 0 --> 1)
- 2) Ratio of frontals in adult sized individuals equal or larger than three (Char. 101: 0 --> 1)
- 3) Frontals tapering gradually (Char. 102: 0 --> 1)
- 4) The largest circumborbital bone is one of the anterior infraorbitals (Char. 125: 1 --> 7)
- 5) Minimum of three anterior infraorbitals (Char. 131: 1 --> 2)
- 6) One suborbital bone (Char. 144: 23 --> 0)
- 7) Absence of supraneural bones (Char. 237: 1 --> 0)
- 8) Maximum of 19 principal caudal fin rays (Char. 281: 1 --> 3)
- 9) Eight principal caudal fin rays below the lateral line (Char. 283: 0 --> 1)
- 10) Presence of serrated appendages (Char. 327: 0 --> 1)

**†*Semionotus* (Node 189):**

*Homoplastic synapomorphies*

- 1) Exposed surface of dermopterotic extending anterior to parietal by less than 30% of its total length (Char. 93: 4 --> 3)
- 2) Only one postorbital bone (Char. 124: 1 --> 0)
- 3) Tooth row is present on only the anterior one third or less of dentary (Char. 183: 0 --> 1)

**(†*Macrosemiidae*, †*Callipurbeckiidae*) (Node 154):**

*Homoplastic synapomorphies*

- 1) Ascending processes of the parasphenoid oriented perpendicularly (Char. 53: 2 --> 0)
- 2) Retroarticular bone included in the joint facet for quadrate (Char. 175: 0 --> 1)

**†*Macrosemiidae sensu* López-Arbarello (2012) (Node 168):**

*Uniquely derived synapomorphies*

- 1) Scroll-like subinfraorbital bones (Char. 127: 0 --> 4)
- 2) Dorsal fin divided in two sections (Char. 301: 0 --> 3)

*Homoplastic synapomorphies*

- 3) Dorsal fin originating anterior to insertion of pelvic and extending opposite to anal fins (Char. 1: 0 --> 3)
- 4) Well-developed peg-and-socket articulation (Char. 8: 1 --> 0)
- 5) Absence of Dorsal ridge of scales between the skull and the dorsal fin (Char. 11: 1 --> 0)
- 6) Absence of lateral ethmoids (Char. 46: 0 --> 1)
- 7) Tubular extrascapular bones (Char. 91: 0 --> 1)

- 8) Posterior extension of parietals median to the single pair of laterally placed extrascapular bones (Char. 92: 0 --> 1)
- 9) Frontal bones with tubular antorbital portion (Char. 102: 1 --> 3)
- 10) Approximately tubular nasal bones (Char. 106: 5 --> 2)
- 11) Widely separated nasal bones (Char. 107: 1 --> 2)
- 12) Minimum of four anterior infraorbital bones (Char. 131: 2 --> 3)
- 13) Tubular antorbital bone (Char. 136: 3 --> 5)
- 14) Absence of suborbital bones (Char. 143: 0 --> 1)
- 15) Slightly concave ventral margin of maxilla (Char. 159: 0 --> 2)
- 16) Absence of supramaxilla (Char. 163: 1 --> 0)
- 17) Posteroventral end of dentary not particularly expanded (Char. 166: 1 --> 0)
- 18) Posterior border of the preopercle notched ventrally (Char. 196: 0 --> 1)
- 19) Interopercle remote from mandible (Char. 205: 0 --> 1)
- 20) Supraorbital sensory canal does not enter in parietal (Char. 216: 0 --> 1)
- 21) No accessory row of scales adjacent to the ventral border of the body lobe (Char. 292: 1 --> 0)
- 22) 21 to 34 dorsal fin rays (Char. 300: 0 --> 1)
- 23) Anal fin bow-shaped or straight (Char. 306: 0 --> 2)
- 24) Ray-like basal fulcra in dorsal fin (Char. 311: 2 --> 3)
- 25) Absence of fringing fulcra in pectoral fin (Char. 334: 0 --> 1)

(†*Notagogous*, †*Macrosemius*, †*Histionotus*) (Node 167):

*Homoplastic synapomorphies*

- 1) Preopercle and dermopterotic are well separated by a space without bone (Char. 195: 0 --> 1)
- 2) Supratemporal commissure pierces extrascapulars and parietals (Char. 218: 0 --> 1)

†*Callipurbeckiidae sensu López-Arbarello (2012)* (Node 153):

*Homoplastic synapomorphies*

- 1) Dermal bones of the skull ornamented with tubercles or ridges (Char. 3: 1 --> 0)
- 2) Absence of marginal row of teeth on ectopterygoid (Char. 63: 1 --> 0)
- 3) Anterior/anterioventral end of preopercle finely tapered (Char. 189: 0 --> 1)
- 4) One unbranched ray forming the dorsal margin of the caudal fin (Char. 282: 2 --> 3)
- 5) One unbranched ray forming the ventral margin of the caudal fin (Char. 285: 1 --> 2)

(†*Semiolepis*, †*Paralepidotus*) (Node 184):

*Homoplastic synapomorphies*

- 1) More than four supraorbital bone (Char. 115: 1 --> 0)
- 2) Between 19 and 50 principal caudal fin rays (Char. 281: 3 --> 1)
- 3) More than eight principal caudal fin rays below the lateral line (Char. 283: 1 --> 0)
- 4) Two to five hypaxial procurrent caudal fin rays (Char. 289: 0 --> 2)
- 5) Slender basal fulcra in the dorsal fin, equalling or more slender than the basal segment of the first dorsal fin ray (Char. 311: 2 --> 0)

(†*Macrosemimimus*, †*Callipurbeckia* (†*Occitanichthys*, †*Tlayuamichin*)) (Node 152):

*Homoplastic synapomorphies*

- 1) Spiny, with a few small spines, posterior margin of ganoid scales (Char. 6: 1 --> 2)
- 2) Double longitudinal articulation of ganoid scales, anterior dorsal and ventral processes (Char. 9: 1 --> 2)
- 3) Most anterior anterior infraorbital narrowing dorsally, expanded ventrally, further ventral than the adjacent anterior infraorbitals (Char. 132: 0 --> 2)
- 4) Two suborbital bones (Char. 144: 0 --> 1)
- 5) Posterior border of maxilla at the anterior orbital margin (Char. 158: 1 --> 3)

(†*Occitanichthys*, †*Tlayuamichin*) (Node 180):

*Homoplastic synapomorphies*

- 1) Dorsal ridge scales with a low spine (Char. 12: 1 --> 0)
- 2) Three suborbital bones (Char. 144: 1 --> 2)

- 3) Large suborbital covering almost the whole area between the infraorbital bones and the preopercle (Char. 147: 1 --> 0)

**(†*Neosemionotus*, Lepisosteiformes) (Node 133):**

*Homoplastic synapomorphies*

- 1) Ganoid scales with smooth posterior margin (Char. 6: 1 --> 0)
- 2) Supraorbital bones large relative to orbit (Char. 117: 0 --> 1)
- 3) Large, keystone shaped dermosphenotic (Char. 119: 3 --> 4)
- 4) Concave posterior margin of caudal fin (Char. 277: 0 --> 2)
- 5) Lateral line emergin at the upper half of supracleithrum (Char. 321: 0 --> 1)

**Lepisosteiformes sensu López-Arbarello (2012) (Node 132):**

*Uniquely derived synapomorphies*

- 1) Broad kidney shaped nasal bones (Char. 106: 5 --> 1)
- 2) Most anterior supraorbital bone trapezoidal, longest ventrally, contacting more than one infraorbital bone (Char. 118: 0 --> 1)

*Homoplastic synapomorphies*

- 3) Two or more accessory row of scales adjacent to the ventral border of the body lobe (Char. 292: 1 --> 2)

**(†*Isanichthys*, Lepidotidae) (Node 159):**

*Homoplastic synapomorphies*

- 1) Dermal bones of the skull ornamented with tubercles or ridges (Char. 3: 1 --> 0)
- 2) The largest circumborbital bone is the dermosphenotic or a supraorbital (all these bones being of similar size) (Char. 125: 1 --> 3)
- 3) Suborbital bones occupy the area between the infraorbitals and preopercle posterior and below the orbit (Char. 145: 0 --> 1)
- 4) Pointed pencil like teeth on anterior coronoids (Char. 185: 0 --> 1)

**Lepidotidae (Node 158):**

*Uniquely derived synapomorphies*

- 1) Large and knob-like antero process of posttemporal bone (Char. 317: 1 --> 2)

*Homoplastic synapomorphies*

- 2) Ganoid scales with serrate or dentate posterior margin (Char. 6: 0 --> 1)
- 3) Frontals tapering gradually (Char. 102: 0 --> 1)
- 4) Ventral border of infraorbital series flexes abruptly dorsally at the anterior margin of the orbit (Char. 133: 0 --> 1)

**Clade including †*Camerichthys* and †*Scheenstia* (Node 157):**

*Homoplastic synapomorphies*

- 1) The most anterior and most dorsal suborbitals are notably larger than the other suborbitals (Char. 149: 0 --> 1)
- 2) Posterior border of maxilla at the anterior orbital margin (Char. 158: 1 --> 3)
- 3) Opercular ornamentation made of well-defined tubercles (Char. 199: 4 --> 1)

**(†*Camerichthys lunae*, †*Scheenstia zappi*) (Node 156):**

*Homoplastic synapomorphies*

- 1) Suprapreopercle present (Char. 197: 0 --> 1)
- 2) Subopercle is more than half de depth of the opercle (Char. 203: 1 --> 0)

**†*Scheenstia maximus* + †*Scheenstia mantelli* (Node 188):**

*Homoplastic synapomorphies*

- 1) Tooth row is present on only the anterior one third or less of dentary (Char. 183: 0 --> 1)

**Lepisosteioidei sensu López-Arbarello (2012) (Node 131):**

*Uniquely derived synapomorphies*

- 1) Parietals about half the length of frontals (Char. 100: 0 --> 1)

*Homoplastic synapomorphies*

- 2) Quadrate laterally covered by infraorbital bones (Char. 112: 0 --> 1)
- 3) Contact between preopercle and jugal or lower postinfraorbital (Char. 126: 0 --> 1)
- 4) Very short maxilla, does not reach the coronoid process (Char. 156: 1 --> 2)
- 5) Supramaxillae absent (Char. 163: 1 --> 0)
- 6) Dentary tooth row present only on the anterior one third or less of dentary (Char. 183: 0 --> 1)
- 7) L-shape preopercle (Char. 187: 2 --> 3)
- 8) Junction of supraorbital and temporal canals exclusively within dermopterotic bone (Char. 215: 1 --> 2)

**Node 130:**

*Uniquely derived synapomorphies*

- 1) Exoccipital placed anterior to basioccipital (Char. 28: 0 --> 2)

*Homoplastic synapomorphies*

- 2) Dorsal fin extending anterior to opposite of insertion of pelvic fins (Char. 1: 0 --> 2)
- 3) Ganoid scales with serrate or dentate posterior margin (Char. 6: 0 --> 1)
- 4) Absence of Dorsal ridge of scales between the skull and the dorsal fin (Char. 11: 1 --> 0)
- 5) Posteroventral end of dentary not particularly expanded (Char. 166: 1 --> 0)
- 6) Supraorbital sensory canal does not enter in parietal (Char. 216: 0 --> 1)
- 7) Maximum of 19 principal caudal fin rays (Char. 281: 1 --> 3)

**Node 144:**

*Uniquely derived synapomorphies*

- 1) Dermal bones of the skull ornamented with sharp tubercles (odontodes) resembling conical teeth (Char. 3: 1 --> 2)
- 2) Opercle ornamented with denticles (Char. 199: 4 --> 3)

*Homoplastic synapomorphies*

- 3) Double longitudinal articulation of ganoid scales, anterior dorsal and ventral processes (Char. 9: 2 --> 1)
- 4) The largest circumborbital bone is the dermosphenotic or a supraorbital (all these bones being of similar size) (Char. 125: 1 --> 3)
- 5) Ventral border of infraorbital series flexes abruptly dorsally at the anterior margin of the orbit (Char. 133: 0 --> 1)
- 6) Opercle approximately as deep as long (Char. 198: 0 --> 1)
- 7) Subopercle is more than half the depth of the opercle (Char. 203: 1 --> 0)

**Lepisosteioidea sensu López-Arbarello (2012) (Node 143):**

*Uniquely derived synapomorphies*

- 1) Ectopterygoid forms most of the palatal region (Char. 64: 0 --> 1)

*Homoplastic synapomorphies*

- 2) Dorsal fin originating approximately at the level of the origin of the anal fin and extending opposite to it (Char. 1: 2 --> 1)
- 3) Anterior ceratohyal elongate hourglass shape (Char. 81: 3 --> 1)
- 4) Frontals tapering gradually (Char. 102: 0 --> 1)
- 5) Large parapophyses fused to the centra (Char. 230: 0 --> 2)
- 6) All or most neural arches fused to the centra (Char. 233: 0 --> 1)
- 7) Very small posttemporal bones (Char. 316: 1 --> 2)

**†Obaichthyidae (Node 165):**

*Uniquely derived synapomorphies*

- 1) Sphenotic fused to dermosphenotic (Char. 42: 0 --> 1)

*Homoplastic synapomorphies*

- 2) Rostral region extends well anterior to the dentary symphysis by more than 50% of mandibular length (Char. 2: 0 --> 1)
- 3) More than two pairs of extrascapulars (Char. 90: 1 --> 2)

- 4) Parietals more than half the length of frontals (Char. 100: 1 --> 0)
- 5) Ratio of frontals in adult sized individuals equal or larger than three (Char. 101: 0 --> 1)
- 6) Quadrate is not laterally covered by infraorbital bones (Char. 112: 0 --> 1)
- 7) Small supraorbital bones (Char. 117: 1 --> 0)
- 8) Small dermosphenotic, not distinctly extended rostrally or caudally (Char. 119: 4 --> 3)
- 9) Dermosphenotic is excluded from orbital margin (Char. 120: 0 --> 1)
- 10) Anterior/anteroventral end of preopercle finely tapered (Char. 189: 0 --> 1)

**Lepisosteidae *sensu* López-Arbarello (2012) (Node 142):**

*Uniquely derived synapomorphies*

- 1) There is no dermosphenotic/sphenotic association (Char. 121: 0 --> 1)
- 2) Maxilla fused to toothed infraorbital bones (Char. 154: 0 --> 1)
- 3) Plicidentine structure in teeth (Char. 177: 0 --> 1)
- 4) Broad ascending process of the subopercle, more than 30% of the maximal length of the bone (Char. 201: 1 --> 0)

*Homoplastic synapomorphies*

- 5) Dermal bones of the skull ornamented with tubercles or ridges (Char. 3: 2 --> 0)
- 6) Ganoid scales with smooth posterior margin (Char. 6: 1 --> 0)
- 7) Suborbital bones completely overlap the dorsal limb of preopercle (Char. 194: 0 --> 1)
- 8) Opercle ornamented with densely arranged low tubercles and/or ridges (Char. 199: 3 --> 0)
- 9) Interopercle absent (Char. 204: 1 --> 0)

†**Masillosteus (Node 177):**

*Uniquely derived synapomorphies*

- 1) Most anterior anterior infraorbital approximately rectangular, deeper than adjacent anterior infraorbital (Char. 132: 0 --> 3)

*Homoplastic synapomorphies*

- 2) Anterior coronoid teeth high, blunt, flattened or broadly rounded (Char. 185: 0 --> 2)
- 3) Vomerine teeth blunt, flattened or broadly rounded (Char. 186: 0 --> 2)

**Lepisosteinae *sensu* Grande (2010) (Node 141):**

*Uniquely derived synapomorphies*

- 1) Elongate ectopterygoid with bar-like anterior portion and deeply expanded posterior portion (Char. 62: 3 --> 4)
- 2) Part of dorsal surface of ectopterygoid ornamented and forming part of skull roof (Char. 65: 0 --> 1)
- 3) A series of toothed infraoborderings the snout (Char. 134: 0 --> 1)

*Homoplastic synapomorphies*

- 4) Originating posterior to insertion of pelvic and extending backwards up to end of anal fin (Char. 1: 1 --> 4)
- 5) Length of parietals more than half the length of frontals (Char. 100: 1 --> 3)
- 6) Tooth row is present on only the anterior one third or less of dentary (Char. 183: 1 --> 0)

**Lepisosteini *sensu* Grande (2010) (Node 140):**

*Uniquely derived synapomorphies*

- 1) In addition to a lateral single row of similar sized dentary teeth, there is a medial row of much larger fangs (Char. 182: 0 --> 1)

*Homoplastic synapomorphies*

- 2) Lower jaw articulation placed in front of the orbit (Char. 69: 3 --> 4)
- 3) Length of parietals less than one half but more than one third the length of frontals (Char. 100: 3 --> 0)
- 4) Ratio of frontals in adult sized individuals equal or larger than three (Char. 101: 0 --> 1)
- 5) Subinfraorbitals subrectangular to triangular, about 1,5 to 2,5 times deeper than long (Char. 127: 2 --> 0)
- 6) Presence of serrated appendages (Char. 327: 0 --> 1)

**Halecomorphi (Node 112):***Uniquely derived synapomorphies*

- 1) Sensory canal in maxilla (Char. 220: 0 --> 1)

*Homoplastic synapomorphies*

- 2) Longitudinal articulation of the scales of the body (Char. 8: 0 --> 1)
- 3) Symplectic participates directly in the jaw joint (Char. 83: 0 --> 1)
- 4) The largest circumborbital bone is the jugal or the lacrimal, both with similar size (Char. 125: 1 --> 8)
- 5) Opercle ornamented with well-defined tubercles (Char. 199: 0 --> 1)

**Node 138:***Homoplastic synapomorphies*

- 1) Absence of quadratojugal (Char. 70: 0 --> 1)

**Node 111:***Uniquely derived synapomorphies*

- 1) Presence of a small postmaxillary process (Char. 161: 0 --> 1)

*Homoplastic synapomorphies*

- 2) Anterior ceratohyal narrow anteriorly, more expansive and laterally compressed posteriorly (Char. 81: 0 --> 2)
- 3) Frontals tapering gradually (Char. 102: 0 --> 1)
- 4) Posterodorsal corner of maxilla forming an acute angle (Char. 160: 0 --> 1)
- 5) Three postcleithra (Char. 325: 4 --> 3)

**Node 110:***Uniquely derived synapomorphies*

- 1) Rostral roughly V-shaped, with lateral horns and caudal triangular process (Char. 141: 0 --> 4)

*Homoplastic synapomorphies*

- 2) Ratio of frontals in adult sized individuals equal or larger than three (Char. 101: 0 --> 1)
- 3) Antorbital approximately tear-shape, broadest anteriorly, narrowing posteriorly (Char. 106: 0 --> 3)
- 4) Lateral line emerging at its upper half of supracleithrum Char. 322: 2 --> 1

**Halecomorphi Section B of Grande & Bemis (1998) (Node 109):***Homoplastic synapomorphies*

- 1) Absence of quadratojugal (Char. 70: 0 --> 1)
- 7) Subopercle less than half the depth of the opercle (Char. 203: 0 --> 1)
- 7) Presupracleithrum absent (Char. 319: 1 --> 0)

**Node 176:***Homoplastic synapomorphies*

- 1) Exposed area of dermopterotic not extending anterior to parietal (Char. 93: 1 --> 4)
- 2) Large preorbital portion of frontal, more than 1/3 of total length of frontal (Char. 104: 0 --> 1)
- 3) More than four supraorbital bones (Char. 115: 2 --> 0)
- 4) All supraorbitals small except the first, most anterior supraorbital, which is large, expanded anteriorly (Char. 117: 0 --> 2)
- 5) Presence of orbital canal (Char. 219: 0 --> 1)
- 6) Eight principal caudal fin rays below the lateral line (Char. 283: 0 --> 1)

**†Ophiopsidae (Node 175):***Uniquely derived synapomorphies*

- 1) Postinfraorbital bones subrectangular and elongated in posterodorsal to anteroventral direction (Char. 123: 0 --> 5)

*Homoplastic synapomorphies*



- 2) Dorsal fin originating anterior to insertion of pelvic and extending opposite to anal fins (Char. 1: 0 --> 3)
- 3) Frontals subrectangular not significantly narrower anteriorly than posteriorly (Char. 102: 1 --> 0)
- 4) Sickle- to L-shape antorbital bone (Char. 136: 2 --> 3)
- 5) Four or more, usually numerous suborbitals (Char. 144: 1 --> 3)
- 6) Absence of postmaxillary process (Char. 161: 1 --> 0)
- 7) Presence of lateral line ossicles between caudal fin rays (Char. 223: 0 --> 1)

**Node 174:**

*Homoplastic synapomorphies*

- 1) Dermosphenotic is excluded from orbital margin (Char. 120: 0 --> 1)
- 2) Smooth surface of arcocentra (Char. 229: 0 --> 2)
- 3) 21 to 34 dorsal fin rays (Char. 300: 0 --> 1)

**Node 108:**

*Homoplastic synapomorphies*

- 1) Dermal bones of the skull smooth or very slightly ornamented (Char. 3: 0 --> 1)
- 2) Elasmoid scales of amioid type (Char. 4: 0 --> 1)
- 3) Posterior extent of exoccipitals do not reach posterior margin of occiput (Char. 25: 0 --> 1)
- 4) Absence of pterotic bone (Char. 37: 0 --> 1)
- 5) Presence of few isolated urodermals (Char. 293: 0 --> 1)

**(†*Caturus*, †*Ionoscopidae*) (Node 161):**

*Homoplastic synapomorphies*

- 1) One or more, and notably large dermopterotic posterior projections (Char. 97: 0 --> 2)
- 2) Absence of supraneural bones (Char. 237: 1 --> 0)
- 3) Dorsal principal caudal fin rays oriented oblique to main axis of hypurals (Char. 280: 0 --> 1)
- 4) A single ventral scute at the base of the caudal fin (Char. 296: 2 --> 1)
- 5) First principal dorsal ray branched (Char. 304: 1 --> 0)
- 6) First principal anal fin ray branched (Char. 309: 1 --> 0)

**†*Ionoscopidae* (Node 169):**

*Uniquely derived synapomorphies*

- 1) Ventral surface of subinfraorbital bones intensely pitted (Char. 128: 0 --> 1)

*Homoplastic synapomorphies*

- 2) Absence of an ossified sclerotic ring (Char. 111: 0 --> 1)
- 3) Sickle- to L-shape antorbital bone (Char. 136: 2 --> 3)
- 4) Three suborbital bones (Char. 144: 1 --> 2)
- 5) Absence of diplospondylous centra in caudal region (Char. 228: 1 --> 0)
- 6) Large parapophyses separated from the centra (Char. 230: 0 --> 1)
- 7) Four or more ural neural spines (Char. 263: 4 --> 0)
- 8) Absence of hypaxial basal fulcra (Char. 291: 0 --> 1)

**Node 181:**

*Uniquely derived synapomorphies*

- 1) Inverted Y-shaped antorbital bone (Char. 106: 3 --> 6)

*Homoplastic synapomorphies*

- 2) Widely separated nasal bones (Char. 107: 1 --> 2)
- 3) Nasals placed lateral to frontals (Char. 108: 0 --> 1)
- 4) Numerous, 11 to 22 ural centra (Char. 258: 1 --> 0)
- 5) 21 to 34 dorsal fin rays (Char. 300: 0 --> 1)
- 6) Blunt anterior process of posttemporal (Char. 317: 0 --> 1)

***Amiidae sensu Grande & Bemis (1998)* (Node 107):**

*Uniquely derived synapomorphies*

- 1) Gular maximal with to maximal length ratio between 0.3 and 0.5 (Char. 209: 0 --> 1)

*Homoplastic synapomorphies*

- 2) One suborbital bone (Char. 144: 1 --> 0)
- 3) Anteriorly projecting spine-like processes on caudal haemal arches (Char. 250: 0 --> 1)
- 4) Convexly rounded caudal fin web (Char. 277: 0 --> 1)
- 5) Ray-like basal fulcra in the dorsal fin (Char. 311: 0 --> 3)
- 6) Ray-like basal fulcra in the anal fin (Char. 312: 0 --> 3)
- 7) Absence of fringing fulcra on dorsal and anal fins (Char. 314: 0 --> 1)
- 8) Absence of fringing fulcra on pelvic fins (Char. 337: 0 --> 1)

† ***Amiopsis* (Node 117):**

*Homoplastic synapomorphies*

- 1) Absence of dorsal scute(s) preceding caudal fin (Char. 295: 2 --> 0)
- 2) More than one ventral scute(s) preceding caudal fin (Char. 296: 2 --> 0)

***Amiida sensu Grande & Bemis (1998) (Node 106):***

*Homoplastic synapomorphies*

- 1) Dorsal fin originating anterior to insertion of pelvic and extending opposite to anal fins (Char. 1: 0 --> 3)
- 2) Parietals less than one half but more than one third the length of frontals (Char. 100: 2 --> 0)
- 3) Absence of fringing fulcra on caudal fins (Char. 297: 0 --> 2)
- 4) 21 to 34 dorsal fin rays (Char. 300: 0 --> 1)
- 5) Bow-shaped dorsal fin (Char. 301: 0 --> 2)

***Amiista sensu Grande & Bemis (1998) (Node 105):***

*Uniquely derived synapomorphies*

- 1) Ascending processes of parasphenoid oriented anteriorly (Char. 53: 2 --> 1)
- 2) Two separate articular bones, not in contact with each other (Char. 171: 1 --> 2)

*Homoplastic synapomorphies*

- 3) Dermal bones of the skull ornamented with tubercles or ridges (Char. 3: 1 --> 0)
- 4) Large postorbital portion of frontal, more than 1/3 of total length of frontal (Char. 104: 0 --> 1)
- 5) Broad nasal bones, approximately rectangular to oval or trapezoidal (Char. 106: 3 --> 0)
- 6) The largest circumborbital bone is a postorbital occupying the posteroventral and posterior rim of the orbit (in some cases this area is occupied by one or more bones of similar size) (Char. 125: 1 --> 2)
- 7) Absence of suborbital bones (Char. 143: 0 --> 1)
- 8) Junction of supraorbital and temporal canals exclusively within frontal bone (Char. 215: 1 --> 0)

***Amiinae sensu Grande & Bemis (1998) (Node 104):***

*Uniquely derived synapomorphies*

- 1) Paired orbitosphenoid ossifications (Char. 44: 0 --> 1)
- 2) All but first hypural fused to the centra (Char. 269: 0 --> 1)
- 3) 43 or more dorsal fin rays (Char. 300: 1 --> 3)

*Homoplastic synapomorphies*

- 4) Length to width ratio of frontals is lower than three (Char. 101: 1 --> 0)
- 5) Nasal bones sutured to each other (Char. 107: 1 --> 0)
- 6) Absence of an ossified sclerotic ring (Char. 111: 0 --> 1)
- 7) Absence of supraorbital bones (Char. 113: 0 --> 1)
- 8) Dermosphenotic extended and tapering caudally, ending at the level of the anterior margin of the dermopterotic (or pterotic) (Char. 119: 3 --> 1)
- 9) Posterodorsal corner of maxilla rounded to straight angle (Char. 160: 1 --> 0)
- 10) Supramaxillary notch (Char. 162: 1 --> 3)
- 11) Middle pit-line leaving a groove or pore-line on the parietal and dermopterotic (Char. 217: 3 --> 0)

- 12) Large parapophyses fused to the centra (Char. 230: 0 --> 2)
- 13) Absence of urodermals (Char. 293: 1 --> 2)
- 14) Absence of scapulocoracoid ossification (Char. 328: 0 --> 1)

***Amia* (Node 103):**

*Uniquely derived synapomorphies*

*Homoplastic synapomorphies*

- 1) Absence of ossified ural neural arches (Char. 262: 3 --> 4)
- 2) Absence of dorsal scute(s) preceding caudal fin (Char. 295: 2 --> 0)
- 3) Lateral line emerging at the middle and supracleithrum (Char. 321: 1 --> 0)

**Node 102:**

*Homoplastic synapomorphies*

- 1) Dermopterotic (or pterotic) exposed surface extending anterior to parietal by more than 30% but less than 40% of its total length (Char. 93: 1 --> 2)
- 2) Opercle approximately as deep as long (Char. 198: 0 --> 1)

† ***Cyclurus* (Node 162):**

*Homoplastic synapomorphies*

- 1) Ascending processes of parasphenoid oriented perpendicular (Char. 53: 1 --> 0)
- 2) Dermopterotic (or pterotic) exposed surface extending posterior to parietal (Char. 94: 0 --> 1)
- 3) Parietal width to length ratio well exceeding 0.90 (Char. 99: 0 --> 1)
- 4) Posterior extent of maxilla up to posterior orbital margin (Char. 157: 0 --> 1)
- 5) Anterior coronoid teeth high, blunt, flattened or broadly rounded (Char. 185: 0 --> 2)
- 6) Vomerine teeth blunt, flattened or broadly rounded (Char. 186: 0 --> 2)

† **Vidalaminae sensu Grande & Bemis (1998) (Node 151):**

*Homoplastic synapomorphies*

- 1) Dentary teeth conical with labiolingually compressed, sharply carinate (keeled) caps (Char. 184: 0 --> 4)
- 2) Gular maximal with to maximal length ratio higher than 0.5 (Char. 209: 1 --> 0)
- 3) Numerous, 11 to 22 ural centra (Char. 258: 1 --> 0)
- 4) One ural neural spine (Char. 263: 4 --> 3)
- 5) Lateral edge of posttemporal elongate, about equal to or greater than width of anterior edge (Char. 318: 0 --> 1)
- 6) Absence of clavicles (Char. 326: 0 --> 1)

† **Calamopleurini sensu Grande & Bemis (1998) (Node 150):**

*Homoplastic synapomorphies*

- 1) Pu1 and U1 fused, forming a compound centrum (Char. 260: 0 --> 1)

† **Vidalamiini sensu Grande & Bemis (1998) (Node 183):**

*Uniquely derived synapomorphies*

- 1) Postmaxillary process notably large, posterior border of maxilla deeply excavated (Char. 161: 1 --> 2)
- 2) Distal ends of pleural ribs flatly truncated (Char. 231: 0 --> 1)
- 3) Basypterygium proximal end rodlike, without significant widening anteriorly (Char. 336: 0 --> 1)

*Homoplastic synapomorphies*

- 4) Supramaxilla short, about a quarter of the length of the maxilla (Char. 164: 0 --> 1)
- 5) Opercle longer than deep (Char. 198: 0 --> 3)

† ***Pachyamia* sensu Grande & Bemis (1998) (Node 182):**

*Homoplastic synapomorphies*

- 1) Dermopterotic (or pterotic) exposed surface extending anterior to parietal by more than 50% of its total length (Char. 93: 1 --> 0)

- 2) Parietals less than one third the length of frontals (Char. 100: 0 --> 2)
- 3) Presence of an interfrontal fontanelle (Char. 105: 0 --> 1)
- 4) Nasal bones sutured to each other (Char. 107: 1 --> 0)
- 5) Dermosphenotic extended and tapering caudally, ending at the level of the anterior margin of the dermopterotic (or pterotic) (Char. 119: 3 --> 1)
- 6) Dermosphenotic is excluded from orbital margin (Char. 120: 0 --> 1)
- 7) Absence of ossified ural neural arches (Char. 262: 3 --> 4)

### **Teleostei (Node 126):**

#### *Uniquely derived synapomorphies*

- 1) Orbitosphenoid confined to the dorsal portion of the orbit (Char. 45: 0 --> 1)
- 2) Quadratojugal fused to quadrate (Char. 71: 0 --> 1)
- 3) Presence of median basibranchial tooth plates (Char. 210: 0 --> 2)

#### *Homoplastic synapomorphies*

- 4) Dermal bones of the skull smooth or very slightly ornamented (Char. 3: 0 --> 1)
- 5) Ganoid scales with smooth posterior margin (Char. 6: 1 --> 0)
- 6) Exit of the vagus nerve (X) placed between intercalar and exoccipital (Char. 24: 0 --> 1)
- 7) Dermal component of intercalar (Char. 34: 0 --> 1)
- 8) Parietals less than one third the length of frontals (Char. 100: 0 --> 2)
- 9) Approximately quadrangular postinfraorbital bones (Char. 123: 0 --> 1)
- 10) Opercle ornamentation weak or absent (Char. 199: 0 --> 4)
- 11) Presence of a chordacentrum (Char. 226: 0 --> 1)
- 12) Dorsal principal caudal fin rays oriented oblique to main axis of hypurals (Char. 280: 0 --> 1)

### **(†*Aspidorhynchus*, †*Pachycormus*) (Node 139):**

#### *Uniquely derived synapomorphies*

- 1) Supramaxilla placed posterodorsal to the maxilla (Char. 165: 0 --> 1)
- 2) Absence of epural bones (Char. 264: 1 --> 0)

#### *Homoplastic synapomorphies*

- 3) Opercular process of hyomandibula notably elongated (Char. 87: 0 --> 1)
- 4) The largest infraorbital is the lacrimal or infraorbital placed at the anteroventral corner of the orbit (Char. 125: 1 --> 6)
- 5) Antorbital bone excluded from the margin of the orbit (Char. 139: 1 --> 0)
- 6) Independent of the total number, there is a large suborbital covering almost the whole area between the infraorbital bones and the preopercle (Char. 147: 0 --> 1)
- 7) Maxilla extremely slender (Char. 158: 1 --> 2)
- 8) Supramaxilla short, about a quarter of the length of the maxilla (Char. 164: 0 --> 1)
- 9) Retroarticular present and fused to articular only (Char. 174: 0 --> 3)
- 10) Arcocentrum present and thin, ring-like centra (Char. 225: 0 --> 1)
- 11) 'Z' or step-like segmentation of marginal principal caudal fin rays (Char. 288: 0 --> 1)
- 12) Epaxial basal fulcra present as procurrent rays (Char. 290: 0 --> 1)
- 13) Lateral line emergin at the upper half of supracleithrum (Char. 321: 0 --> 1)

### **Node 125:**

#### *Uniquely derived synapomorphies*

- 1) Symplectic shape slightly curved tube or splint (Char. 85: 1 --> 0)
- 2) Antorbital bone approximately triangular or drop-like, narrowing posterodorsally (Char. 136: 1 --> 0)

#### *Homoplastic synapomorphies*

- 3) Posterior end of the fossa parampullaris of Bjerring (1984) in autopterotic (Char. 14: 0 --> 2)
- 4) Well-developed basiptyergoid processes of parasphenoid (Char. 51: 0 --> 1)
- 5) Lower jaw articulation placed around the level of the posterior border of the orbit (Char. 69: 0 --> 1)
- 6) Anterodorsal ascending margin of the dentary interrupted by a characteristic notch (so-called leptolepid notch) (Char. 167: 0 --> 1)

**Node 160 :***Homoplastic synapomorphies*

- 1) Presence of supraoccipital bone (Char. 17: 0 --> 1)
- 2) Ascending processes of the parasphenoid oriented perpendicularly (Char. 53: 2 --> 0)
- 3) Absence of marginal row of teeth on ectopterygoid (Char. 63: 1 --> 0)
- 4) Nasal bones sutured to each other (Char. 107: 2 --> 0)
- 5) Three or four supraorbital bones (Char. 115: 3 --> 1)
- 6) Junction of supraorbital and temporal canals no direct connection between the temporal (otic) and supraorbital sensory canals (Char. 214: 1 --> 0)
- 7) Median neural spines on abdominal vertebrae (Char. 234: 0 --> 1)

**Node 124:***Uniquely derived synapomorphies*

- 1) Two supramaxillae (Char. 163: 1 --> 2)
- 2) Gular maximal with to maximal length ratio lower than 0.3 (Char. 209: 0 --> 2)

*Homoplastic synapomorphies*

- 3) Presence of a parasphenoid tooth patch (Char. 56: 1 --> 0)
- 4) Posterior nostril completely included in the posterior portion of the nasals (Char. 109: 0 --> 1)
- 5) Maxilla very long, extends beyond the coronoid process (Char. 156: 1 --> 0)
- 6) Preopercle and dermopterotic are well separated by a space without bone (Char. 195: 0 --> 1)
- 7) 10 to 15 branchiostegal rays (Char. 207: 3 --> 2)

**Pholidophoriformes (Node 129):***Homoplastic synapomorphies*

- 1) Absence of pterotic bone (Char. 37: 0 --> 1)
- 2) Absence of lateral dermethmoids (Char. 47: 1 --> 0)
- 3) Symplectic participates directly in the jaw joint (Char. 83: 0 --> 1)
- 4) Two supraorbital bones (Char. 115: 3 --> 2)
- 5) Supraorbital sensory canal does not enter in parietal (Char. 216: 0 --> 1)
- 6) Presence of a pectoral axillary process (Char. 335: 0 --> 1)
- 7) Spatulate fin rays only in pectoral fins (Char. 339: 0 --> 1)

**Node 128:***Uniquely derived synapomorphies*

- 1) Anterior notch of preopercle (Char. 193: 0 --> 1)

*Homoplastic synapomorphies*

- 2) Lower jaw articulation at the level of the centre of the orbit (Char. 69: 1 --> 2)
- 3) Largest premaxillary teeth larger than dentary teeth (Char. 179: 0 --> 1)

**Node 127:***Homoplastic synapomorphies*

- 1) Opercular ornamentation made of well-defined tubercles (Char. 199: 4 --> 1)
- 2) One accessory row of scales adjacent to the ventral border of the body lobe (Char. 292: 0 --> 1)

**Node 170:***Homoplastic synapomorphies*

- 1) Independent of the total number, there is a large suborbital covering almost the whole area between the infraorbital bones and the preopercle (Char. 147: 0 --> 1)
- 2) Opercular ornamentation made of densely arranged low tubercles and/or ridges (Char. 199: 4 --> 0)
- 3) Tiny ascending process of subopercle, its base being less than 10% of the maximal length of the bone (Char. 201: 1 --> 2)

**Node 185:**

### *Homoplastic synapomorphies*

- 1) Extrascapular bones semicircular, expanded caudolaterally (Char. 91: 0 --> 2)
- 2) Antorbital approximately tear-shape, broadest anteriorly, narrowing posteriorly (Char. 106: 0 --> 3)
- 3) Nasal bones broad kidney shaped (Char. 107: 2 --> 1)
- 4) Posterodorsal corner of maxilla forming an acute angle (Char. 160: 0 --> 1)

### **Node 123:**

#### *Uniquely derived synapomorphies*

- 1) Posteroventral angle of an L-shape preopercle expanded fan shape (Char. 191: 0 --> 1)

#### *Homoplastic synapomorphies*

- 2) Independent of the total number, there is a large suborbital covering almost the whole area between the infraorbital bones and the preopercle (Char. 147: 0 --> 1)
- 3) L-shape preopercle (Char. 187: 2 --> 3)
- 4) Low ascending process of preopercle, its height being 20% of the maximal length of the bone (Char. 202: 1 --> 0)
- 5) Preopercular sensory canal with 12 or more long, simple or branched tubules (Char. 221: 1 --> 2)
- 6) Epineural bones present (Char. 239: 0 --> 1)
- 7) Neural spine on second preural vertebra (Pu2) shorter than neural spine on third preural vertebra (Char. 246: 0 --> 1)
- 8) Two fin rays, at least the first unbranched, forming the dorsal margin of the caudal fin (Char. 282: 3 --> 1)
- 9) Dorsal processes of the bases of innermost principal caudal fin rays (Char. 286: 0 --> 1)
- 10) 'Z' or step-like segmentation of marginal principal caudal fin rays (Char. 288: 0 --> 1)
- 11) Lateral line emerging at the upper half of supracleithrum (Char. 321: 0 --> 1)

### **Node 122:**

#### *Uniquely derived synapomorphies*

- 1) Presence of urohyal (Char. 75: 0 --> 1)
- 2) Exposed surface of dermopterotic resembling an inverted L (Char. 95: 0 --> 1)
- 3) Rostral bone relatively large and roughly rounded or rectangular-shaped without lateral horns (Char. 141: 2 --> 3)

#### *Homoplastic synapomorphies*

- 4) Presence of supraoccipital bone (Char. 17: 0 --> 1)
- 5) Absence of a notch in the anterodorsal ascending margin of the dentary (Char. 167: 1 --> 0)

### **Node 121:**

#### *Homoplastic synapomorphies*

- 1) Absence of suborbital bones (Char. 143: 0 --> 1)
- 2) Arcocentrum present and thin, ring-like centra (Char. 225: 0 --> 1)
- 3) Absence of diplospondylous centra in caudal region (Char. 228: 1 --> 0)
- 4) Epaxial basal fulcra present as procurrent rays (Char. 290: 0 --> 1)

### **Node 120:**

#### *Uniquely derived synapomorphies*

- 1) Elasmoid scales of cycloid type (Char. 4: 0 --> 2)
- 2) Lateral dermethmoids forming part of a compound mesethmoid with chondral and dermal components (Char. 48: 1 --> 3)
- 3) Well-developed postarticular process of lower jaw, extending posterior to the articular facet for quadrate (Char. 172: 0 --> 1)
- 4) Presence of autocentrum (Char. 227: 0 --> 1)

#### *Homoplastic synapomorphies*

- 5) Absence of canal or groove for the dorsal aorta in the surface of the basioccipital (Char. 32: 1 --> 2)
- 6) Absence of opisthotic (Char. 36: 0 --> 1)

- 7) Dermopterotic (or pterotic) exposed surface extending posterior to parietal (Char. 94: 0 --> 1)
- 8) Absence of surangular (Char. 170: 1 --> 0)
- 9) Anteromedial wing of preopercle absent (Char. 192: 1 --> 0)
- 10) Absence of fringing fulcra on dorsal and anal fins (Char. 314: 0 --> 1)
- 11) Cleithrum sickle with anterior portion bent downwards (Char. 322: 2 --> 3)
- 12) Cleithrum not ornamented (Char. 324: 1 --> 0)
- 13) Absence of fringing fulcra in pectoral fin (Char. 334: 0 --> 1)
- 14) Absence of fringing fulcra on pelvic fins (Char. 337: 0 --> 1)

**Node 119:**

*Uniquely derived synapomorphies*

- 1) Epipleural bones (Char. 240: 0 --> 1)

*Homoplastic synapomorphies*

- 2) Absence of posterior projection(s) of dermopterotic (Char. 97: 1 --> 0)
- 3) Absence of 'posterior uroneurals' (Char. 274: 1 --> 0)
- 4) One unbranched ray forming the dorsal margin of the caudal fin (Char. 282: 1 --> 3)
- 5) One unbranched ray forming the ventral margin of the caudal fin (Char. 285: 0 --> 2)
- 6) Bases of innermost principal caudal fin rays narrow, with pointed proximal end (Char. 287: 0 --> 1)

**Node 173:**

*Homoplastic synapomorphies*

- 1) Anterodorsal ascending margin of the dentary interrupted by a characteristic notch (so-called leptolepid notch) (Char. 167: 0 --> 1)
- 2) Epipleural bones in abdominal and anterior caudal region (Char. 242: 0 --> 1)
- 3) Absence of hypaxial basal fulcra (Char. 291: 0 --> 1)
- 4) First anal pterygiophore posterior to first haemal spine or infrahaemal (Char. 307: 1 --> 0)

**Leptolepid-clade (Node 172):**

*Uniquely derived synapomorphies*

- 1) Preopercular process of hyomandibula (Char. 86: 0 --> 1)
- 2) Preural neural spines broad with a median groove (Char. 243: 0 --> 1)
- 3) Preural haemal spines broad with a median groove (Char. 244: 0 --> 1)

*Homoplastic synapomorphies*

- 4) Retroarticular bone included in the joint facet for quadrate (Char. 175: 0 --> 1)
- 5) Anteriorly projecting spine-like processes on caudal neural arches (Char. 249: 0 --> 1)
- 6) First and second hypurals fused at their bases only (Char. 268: 0 --> 1)
- 7) Absence of space or diastema between second and third hypurals (Char. 270: 1 --> 0)

**Node 171:**

*Homoplastic synapomorphies*

- 1) Dermopterotic (or pterotic) exposed surface not extending posterior to parietal (Char. 94: 1 --> 0)
- 2) Posteroventral angle of an L-shape preopercle not distinctly expanded (Char. 191: 1 --> 0)
- 3) Tiny ascending process of subopercle, its base being less than 10% of the maximal length of the bone (Char. 201: 1 --> 2)
- 4) Subopercle is more than half the depth of the opercle (Char. 203: 1 --> 0)
- 5) Smooth autocentra (Char. 330: 1 --> 0)
- 6) Anterior supraneurals not expanded, simple rod-like (Char. 238: 1 --> 0)
- 7) Epipleural bones absent (Char. 240: 1 --> 0)

**Teleocephala (Node 118):**

*Homoplastic synapomorphies*

- 1) Basipterygoid processes of parasphenoid almost or totally absent (Char. 51: 1 --> 0)
- 2) Absence of parasphenoid tooth patch (Char. 56: 0 --> 1)
- 3) Dentary teeth of similar size arranged in two or more rows and (Char. 182: 0 --> 2)

- 4) Seven hypurals (Char. 267: 0 --> 1)
- 5) First uroneural extent up to preural centrum 2 (Char. 275: 0 --> 1)
- 6) Two uroneurals extending forwards beyond second ural centrum (Char. 276: 0 --> 1)
- 7) Absence of dorsal processes of the bases of innermost principal caudal fin rays (Char. 286: 1 --> 0)
- 8) Lateral line emerging at the middle (Char. 322: 3 --> 0)
- 9) Medial wing of cleithrum absent (Char. 323: 1 --> 0)

**Node 149:**

*Homoplastic synapomorphies*

- 1) Ascending process of subopercle of medium height, 20-40% of the maximal length of the bone (Char. 202: 0 --> 1)
- 2) Absence of ural neural spines (Char. 263: 3 --> 4)
- 3) Three or less uroneurals (Char. 273: 1 --> 2)
- 4) Simple first dorsal proximal pterygiophore (Char. 302: 1 --> 0)

**Node 148:**

*Uniquely derived synapomorphies*

- 1) Bar-like ectopterygoid (Char. 62: 2 --> 5)
- 2) Tooth plates present on infrapharyngobranchials 1 to 3 (Char. 212: 2 --> 3)

*Homoplastic synapomorphies*

- 3) Intercalar without extensive dermal outgrowths (Char. 35: 1 --> 0)
- 4) Rostral bone absent, no trace of ethmoidal commissure (Char. 140: 2 --> 4)
- 5) Absence of gulars (Char. 208: 1 --> 0)
- 6) Preural haemal arches (excluding the parhypural) fused to the centra (Char. 256: 0 --> 1)

**Clupeocephala (Node 147):**

*Homoplastic synapomorphies*

- 1) Maxilla extent up to centre of the orbit (Char. 157: 1 --> 2)
- 2) Posteroventral angle of an L-shape preopercle not distinctly expanded (Char. 191: 1 --> 0)
- 3) Preopercular sensory canal with four or less, short simple tubules (Char. 221: 1 --> 0)
- 4) Epipleural bones in abdominal and anterior caudal region (Char. 242: 0 --> 3)
- 5) Six or less hypurals (Char. 267: 1 --> 2)
- 6) One to three principal caudal fin rays associated with the preural skeleton (Char. 284: 3 --> 4)

**Node 166:**

*Uniquely derived synapomorphies*

- 1) Preural neural spines broad due to anterior and posterior membranous outgrowths (Char. 243: 0 --> 2)
- 2) Preural haemal spines broad due to anterior and posterior membranous outgrowths (Char. 244: 0 --> 2)

*Homoplastic synapomorphies*

- 3) Anteriorly projecting spine-like processes on caudal neural arches (Char. 249: 0 --> 1)
- 4) First and second hypurals fused at their bases only (Char. 268: 0 --> 1)
- 5) Bipartite or tripartite first dorsal proximal pterygiophore (Char. 302: 1 --> 0)
- 6) Cleithrum sickle with anterior portion bent downwards (Char. 322: 0 --> 3)
- 7) Medial wing of cleithrum absent (Char. 323: 0 --> 1)

**Node 146:**

*Uniquely derived synapomorphies*

- 1) Splint-like antorbital bone (Char. 136: 0 --> 6)

*Homoplastic synapomorphies*

- 2) Tubular extrascapular bones (Char. 91: 0 --> 1)
- 3) First uroneural extend anteriorly up to preural centrum 1 (Char. 275: 1 --> 2)

**Node 145:**



*Uniquely derived synapomorphies*

- 1) Lateroparietal skull roof (Char. 98: 0 --> 1)

*Homoplastic synapomorphies*

- 2) Presence of a supraoccipital crest (Char. 18: 0 --> 1)
- 3) Presence of a parasphenoid tooth patch (Char. 56: 1 --> 0)
- 4) Straight or almost straight ventral margin of maxilla (Char. 159: 1 --> 0)
- 5) Presence of 'posterior uroneurals' (Char. 274: 0 --> 1)

**Node 179:**

*Uniquely derived synapomorphies*

- 1) High and triangular supraoccipital crest (Char. 19: 1 --> 0)

*Homoplastic synapomorphies*

- 2) Dorsal fin extending anterior to opposite of insertion of pelvic fins (Char. 1: 0 --> 2)
- 3) Parasphenoid long, reaching the occipital condyle or close to it (Char. 50: 1 --> 2)
- 4) Very large dermosphenotic, extended and tapering caudally, reaching close to the level of the preopercular canal (Char. 119: 0 --> 2)
- 5) Presence of a rostrodermethmoid (Char. 140: 4 --> 3)
- 6) Junction of supraorbital and temporal canals no direct connection between the temporal (otic) and supraorbital sensory canals (Char. 214: 1 --> 0)
- 7) Epipleural bones absent (Char. 240: 1 --> 0)

**Node 178:**

*Uniquely derived synapomorphies*

- 1) Premaxillary teeth organized in a single row plus anterior fang (Char. 178: 0 --> 2)

*Homoplastic synapomorphies*

- 2) Posterior process of epioccipital (Char. 21: 0 --> 1)
- 3) Ectopterygoid approximately boomerang shape (Char. 62: 5 --> 2)
- 4) Semicircular extrascapulars, expanded caudolaterally (Char. 91: 1 --> 2)
- 5) Absence of antorbital bone (Char. 135: 0 --> 1)
- 6) Maxilla extremely slender (Char. 158: 1 --> 2)
- 7) Posterodorsal corner of maxilla forming an acute angle (Char. 160: 0 --> 1)
- 4) Largest premaxillary teeth larger than dentary teeth Char. 179: 0 --> 1
- 5) Neural spine on second preural vertebra (Pu2) shorter than neural spine on third preural vertebra (Char. 246: 0 --> 1)
- 6) First and second hypurals fused to each other along their length (Char. 268: 0 --> 2)
